# Supplementary material for: Construction of highly sterically hindered 1,1-disilylated terminal alkenes
Source: Royal Society of Chemistry journal article supplement (doi:10.1039/c8cc07765g), 2018-01-01

## Supporting Information

# Construction of highly sterically hindered geminal disilylated terminal alkenes

Xueyan Zhang,<sup>1§</sup> Xin Ji,<sup>1§</sup> Xingze Xie,<sup>1</sup> and Shengtao Ding<sup>1</sup>.

<sup>1</sup> *State Key Laboratory of Organic-Inorganic Composites, College of Chemical Engineering, Beijing University of Chemical Technology, Beijing, China*

<sup>§</sup> *These authors contributed equally to this work.*

## Table of Contents

|                                                                          |             |
|--------------------------------------------------------------------------|-------------|
| <b>I. General Information.....</b>                                       | <b>S-2</b>  |
| <b>II. Ru-Catalyzed Hydrosilylation of 1-Silyl Terminal Alkenes.....</b> | <b>S-3</b>  |
| <b>III. Derivatizations of the Hydrosilylation Products.....</b>         | <b>S-10</b> |
| <b>IV. Deuterium Labeling Experiment .....</b>                           | <b>S-12</b> |
| <b>V. <sup>1</sup>H NMR and <sup>13</sup>C NMR Spectra.....</b>          | <b>S-14</b> |

## I. General Information

All air or moisture sensitive reactions were conducted in oven-dried glassware under nitrogen atmosphere using dry solvents. Flash column chromatography was performed over silica gel (200-300 mesh) purchased from Qingdao Puke Co., China. Silanes and common organic chemicals were purchased from commercial suppliers, such as Sigma-Aldrich<sup>®</sup> and J&K<sup>®</sup> Scientific Ltd., and used as received. [CpRu(MeCN)<sub>3</sub>]PF<sub>6</sub> and [Cp\*Ru(MeCN)<sub>3</sub>]PF<sub>6</sub> were purchased from Strem<sup>®</sup> Chemicals, Inc. <sup>1</sup>H and <sup>13</sup>C NMR spectra were collected on a Bruker AV 400 MHz NMR spectrometer using residue solvent peaks as an internal standard (<sup>1</sup>H NMR: CDCl<sub>3</sub> at 7.26 ppm, <sup>13</sup>C NMR: CDCl<sub>3</sub> at 77.0 ppm). Mass spectra were collected on an Thermo Scientific GC/MS ISQ7000 system, or a Xevo G2 Qtof mass spectrometer.

## II. Ru-Catalyzed Hydrosilylation of 1-Silyl Terminal Alkynes

### General Procedure.

In a glove box, to an oven-dried 5-mL vial was added the alkyne (0.40 mmol), the silane (0.60 mmol), [CpRu(MeCN)<sub>3</sub>]PF<sub>6</sub> (0.008 mmol), and DCM (2.0 mL). The vial was capped and removed from the glove box. The reaction mixture was stirred at room temperature for 4 h, and then concentrated under reduced pressure. The residue was purified by silica gel flash column chromatography (eluent: 0→10% EtOAc in hexanes) to give the desired product.

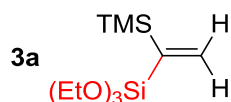

**Triethoxy(1-(trimethylsilyl)vinyl)silane (3a)** was prepared as colorless oil from ethynyltrimethylsilane (0.40 mmol, 40.0 mg) and (EtO)<sub>3</sub>SiH (0.60 mmol, 100.6 mg), according to the General Procedure in 78% yield (81.9 mg, 78%,  $\alpha/\beta > 50:1$ ).

<sup>1</sup>H NMR (400 MHz, CDCl<sub>3</sub>)  $\delta$  6.56 (d,  $J = 5.6$  Hz, 1 H), 6.41 (d,  $J = 5.6$  Hz, 1 H), 3.78 (q,  $J = 6.8$  Hz, 6 H), 1.20 (t,  $J = 6.8$  Hz, 9 H), 0.10 (s, 9 H).

<sup>13</sup>C NMR (100 MHz, CDCl<sub>3</sub>)  $\delta$  146.4, 144.9, 58.3, 18.1, -1.2.

MS (ESI)  $m/z$  (relative intensity) 247.11(100) [M-15(CH<sub>3</sub>)]<sup>+</sup>.

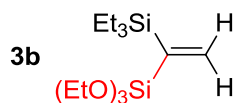

**Triethoxy(1-(triethylsilyl)vinyl)silane (3b)** was prepared as colorless oil from triethyl(ethynyl)silane (0.40 mmol, 56.2 mg) and (EtO)<sub>3</sub>SiH (0.60 mmol, 100.6 mg), according to the General Procedure in 96% yield (117.0 mg, 96%,  $\alpha/\beta > 50:1$ ).

<sup>1</sup>H NMR (400 MHz, CDCl<sub>3</sub>)  $\delta$  6.65 (d,  $J = 5.6$  Hz, 1 H), 6.41 (d,  $J = 5.6$  Hz, 1 H), 3.79 (q,  $J = 6.8$  Hz, 6 H), 1.20 (t,  $J = 6.8$  Hz, 9 H), 0.90 (t,  $J = 8.0$  Hz, 9 H), 0.63 (q,  $J = 8.0$  Hz, 6 H).

<sup>13</sup>C NMR (100 MHz, CDCl<sub>3</sub>)  $\delta$  146.3, 143.2, 58.3, 18.1, 7.2, 3.1.

MS (ESI)  $m/z$  (relative intensity) 275.21 (100) [M-29(C<sub>2</sub>H<sub>5</sub>)]<sup>+</sup>.

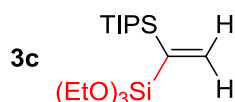

**Triethoxy(1-(triisopropylsilyl)vinyl)silane (3c)** was prepared as colorless oil from ethynyltriisopropylsilane (0.40 mmol, 73.0 mg) and  $(\text{EtO})_3\text{SiH}$  (0.60 mmol, 100.6 mg) according to the General Procedure in 89% yield (123.4 mg, 89%,  $\alpha/\beta > 50:1$ ).

$^1\text{H NMR}$  (400 MHz,  $\text{CDCl}_3$ )  $\delta$  6.74 (d,  $J = 5.6$  Hz, 1 H), 6.47 (d,  $J = 5.6$  Hz, 1 H), 3.80 (q,  $J = 6.8$  Hz, 6 H), 1.32-1.23 (m, 3 H), 1.22 (t,  $J = 6.8$  Hz, 9 H), 1.05 (d,  $J = 7.6$  Hz, 18 H).

$^{13}\text{C NMR}$  (100 MHz,  $\text{CDCl}_3$ )  $\delta$  147.7, 141.3, 58.4, 18.7, 18.1, 11.3.

**MS** (ESI)  $m/z$  (relative intensity) 303.21(100)  $[\text{M}-43(\text{C}_3\text{H}_7)]^+$ .

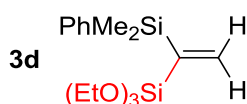

**(1-(Dimethyl(phenyl)silyl)vinyl)triethoxysilane (3d)** was prepared as colorless oil from ethynyldimethyl(phenyl)silane (0.40 mmol, 64.1 mg) and  $(\text{EtO})_3\text{SiH}$  (0.60 mmol, 100.6 mg) according to the General Procedure in 87% yield (112.8 mg, 87%,  $\alpha/\beta > 50:1$ ).

$^1\text{H NMR}$  (400 MHz,  $\text{CDCl}_3$ )  $\delta$  7.56-7.53 (m, 2 H), 7.35-7.33 (m, 3 H), 6.67 (d,  $J = 5.6$  Hz, 1 H), 6.40 (d,  $J = 5.6$  Hz, 1 H), 3.73 (q,  $J = 7.2$  Hz, 6 H), 1.17 (t,  $J = 7.2$  Hz, 9 H), 0.43 (s, 6 H).

$^{13}\text{C NMR}$  (100 MHz,  $\text{CDCl}_3$ )  $\delta$  146.9, 144.5, 138.4, 134.2, 128.7, 127.5, 58.3, 18.1, -2.5.

**HRMS**  $m/z$  (CI) calcd. for  $\text{C}_{16}\text{H}_{29}\text{O}_3\text{Si}_2$  ( $\text{M}+\text{H}$ ) $^+$  325.1655, found 325.1641.

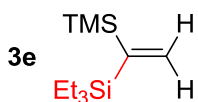

**Triethyl(1-(trimethylsilyl)vinyl)silane (3e)** was prepared as colorless oil from ethynyltrimethylsilane (0.40 mmol, 40.0 mg) and  $\text{Et}_3\text{SiH}$  (0.60 mmol, 69.8 mg) according to the General Procedure in 84% yield (72.1 mg, 84%,  $\alpha/\beta > 50:1$ ).

$^1\text{H NMR}$  (400 MHz,  $\text{CDCl}_3$ )  $\delta$  6.38 (d,  $J = 5.2$  Hz, 1 H), 6.28 (d,  $J = 5.2$  Hz, 1 H), 0.90 (t,  $J = 7.6$  Hz, 9 H), 0.62 (q,  $J = 7.6$  Hz, 6 H), 0.09 (s, 9 H).

$^{13}\text{C NMR}$  (100MHz,  $\text{CDCl}_3$ )  $\delta$  151.0, 141.6, 7.4, 3.6, 0.2.

**MS** (ESI)  $m/z$  (relative intensity) 214.28(0.5), 87.12(100)  $[M]^+$ .

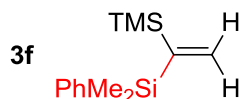

**(1-(Dimethyl(phenyl)silyl)vinyl)trimethylsilane (3f)** was prepared as colorless oil from ethynyltrimethylsilane (0.40 mmol, 40.0 mg) and  $\text{PhMe}_2\text{SiH}$  (0.60 mmol, 81.8 mg) according to the General Procedure in 84% yield (78.8 mg, 84%,  $\alpha/\beta > 50:1$ ).

**$^1\text{H}$  NMR** (400 MHz,  $\text{CDCl}_3$ )  $\delta$  7.50-7.46 (m, 2 H), 7.36-7.33 (m, 3 H), 6.41 (d,  $J = 4.8$  Hz, 1 H), 6.31 (d,  $J = 4.8$  Hz, 1 H), 0.39 (s, 6 H), 0.00 (s, 9 H).

**$^{13}\text{C}$  NMR** (100 MHz,  $\text{CDCl}_3$ )  $\delta$  152.9, 141.9, 139.1, 134.1, 128.8, 127.6, -0.3, -1.8.

**MS** (ESI)  $m/z$  (relative intensity) 234.32(12), 135.14(100)  $[M]^+$ .

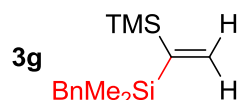

**Benzyldimethyl(1-(trimethylsilyl)vinyl)silane (3g)** was prepared as colorless oil from ethynyltrimethylsilane (0.40 mmol, 40.0 mg) and  $\text{BnMe}_2\text{SiH}$  (0.60 mmol, 90.2 mg) according to the General Procedure in 85% yield (84.5 mg, 85%,  $\alpha/\beta > 50:1$ ).

**$^1\text{H}$  NMR** (400 MHz,  $\text{CDCl}_3$ )  $\delta$  7.24-7.18 (m, 2 H), 7.10-7.15 (m, 1 H), 7.01-6.98 (m, 2 H), 6.36 (d,  $J = 5.2$  Hz, 1 H), 6.29 (d,  $J = 5.2$  Hz, 1 H), 2.18 (s, 2 H), 0.13 (s, 9 H), 0.07 (s, 6 H).

**$^{13}\text{C}$  NMR** (100MHz,  $\text{CDCl}_3$ )  $\delta$  153.0, 141.2, 140.1, 128.3, 128.0, 123.9, 26.4, -0.3, -2.5.

**HRMS**  $m/z$  (CI) calcd. for  $\text{C}_{14}\text{H}_{25}\text{Si}_2$  ( $M+H$ ) $^+$  249.1496, found 249.1507.

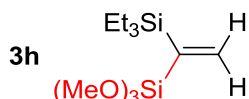

**Triethyl(1-(trimethoxysilyl)vinyl)silane (3h)** was prepared as colorless oil from triethyl(ethynyl)silane (0.40 mmol, 56.2 mg) and  $(\text{MeO})_3\text{SiH}$  (0.60 mmol, 73.3 mg) according to the General Procedure in 88% yield (92.4 mg, 88%,  $\alpha/\beta > 50:1$ ).

**$^1\text{H}$  NMR** (400 MHz,  $\text{CDCl}_3$ )  $\delta$  6.66 (d,  $J = 5.2$  Hz, 1 H), 6.46 (d,  $J = 5.2$  Hz, 1 H), 3.55 (s, 9 H), 0.92 (t,  $J = 8.0$  Hz, 9 H), 0.65 (q,  $J = 8.0$  Hz, 6 H).

**$^{13}\text{C}$  NMR** (100 MHz,  $\text{CDCl}_3$ )  $\delta$  147.0, 141.7, 50.5, 7.2, 3.0.

**HRMS**  $m/z$  (CI) calcd. for  $C_{11}H_{27}O_3Si_2$  ( $M+H$ )<sup>+</sup> 263.1499, found 263.1469.

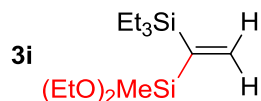

**(1-(Diethoxy(methyl)silyl)vinyl)triethylsilane (3i)** was prepared as colorless oil from triethyl(ethynyl)silane (0.40 mmol, 56.2 mg) and  $(EtO)_2MeSiH$  (0.60 mmol, 80.6 mg) according to the General Procedure in 88% yield (96.6 mg, 88%,  $\alpha/\beta > 50:1$ ).

**<sup>1</sup>H NMR** (400 MHz,  $CDCl_3$ )  $\delta$  6.56 (d,  $J = 5.2$  Hz, 1 H),  $\delta$  6.38 (d,  $J = 5.2$  Hz, 1 H), 3.74 (q,  $J = 7.2$  Hz, 4 H), 1.21 (t,  $J = 7.2$  Hz, 6 H), 0.92 (t,  $J = 7.6$  Hz, 9 H), 0.65 (t,  $J = 7.6$  Hz, 6 H), 0.17 (s, 3 H).

**<sup>13</sup>C NMR** (100 MHz,  $CDCl_3$ )  $\delta$  147.3, 144.7, 58.0, 18.3, 7.3, 3.2, -3.9.

**HRMS**  $m/z$  (CI) calcd. for  $C_{13}H_{29}O_2Si_2$  ( $M-H$ )<sup>+</sup> 273.1705, found 273.1700.

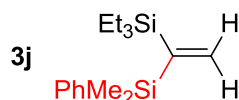

**(1-(Dimethyl(phenyl)silyl)vinyl)triethylsilane (3j)** was prepared as colorless oil from triethyl(ethynyl)silane (0.40 mmol, 56.2 mg) and  $PhMe_2SiH$  (0.60 mmol, 81.8 mg) according to the General Procedure in 93% yield (102.9 mg, 93%,  $\alpha/\beta > 50:1$ ).

**<sup>1</sup>H NMR** (400 MHz,  $CDCl_3$ )  $\delta$  7.55-7.52 (m, 2 H), 7.39-7.36 (m, 3 H), 6.46 (d,  $J = 5.2$  Hz, 1 H), 6.44 (d,  $J = 5.2$  Hz, 1 H), 0.88 (t,  $J = 8.0$  Hz, 9 H), 0.56 (q,  $J = 8.0$  Hz, 6 H), 0.43 (s, 6 H).

**<sup>13</sup>C NMR** (100 MHz,  $CDCl_3$ )  $\delta$  149.4, 143.6, 139.1, 134.0, 128.7, 127.6, 7.3, 3.5, -1.7.

**MS** (ESI)  $m/z$  (relative intensity) 276.52 (0.6), 247.30 (100) [ $M$ ]<sup>+</sup>.

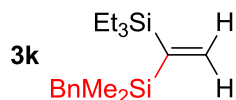

**Benzyl dimethyl(1-(triethylsilyl)vinyl)silane (3k)** was prepared as colorless oil from triethyl(ethynyl)silane (0.40 mmol, 56.2 mg) and  $BnMe_2SiH$  (0.60 mmol, 90.2 mg) according to the General Procedure in 97% yield (112.8 mg, 97%,  $\alpha/\beta > 50:1$ ).

**<sup>1</sup>H NMR** (400 MHz, CDCl<sub>3</sub>) δ 7.26-7.22 (m, 2 H), 7.12-7.02 (m, 3 H), 6.43 (d, *J* = 4.8 Hz, 1 H), 6.39 (d, *J* = 4.8 Hz, 1 H), 2.2 (s, 2 H), 0.96 (t, *J* = 7.6 Hz, 9 H), 0.68 (q, *J* = 7.6 Hz, 6 H), 0.09 (s, 6 H).

**<sup>13</sup>C NMR** (100 MHz, CDCl<sub>3</sub>) δ 149.3, 142.8, 140.2, 128.4, 128.0, 123.9, 26.3, 7.4, 3.7, -2.5.

**HRMS** *m/z* (CI) calcd. for C<sub>17</sub>H<sub>34</sub>NSi<sub>2</sub> (M+NH<sub>4</sub><sup>+</sup>)<sup>+</sup> 308.2230, found 308.2241.

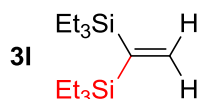

**Ethene-1,1-diylbis(triethylsilane) (3l)** was prepared as colorless oil from triethyl(ethynyl)silane (0.40 mmol, 56.2 mg) and Et<sub>3</sub>SiH (0.60 mmol, 69.8 mg) according to the General Procedure in 93% yield (95.5 mg, 93%, α/β > 50:1).

**<sup>1</sup>H NMR** (400 MHz, CDCl<sub>3</sub>) δ 6.39 (s, 2 H), 0.91 (t, *J* = 7.6 Hz, 18 H), 3.78 (q, *J* = 7.6 Hz, 12 H).

**<sup>13</sup>C NMR** (100 MHz, CDCl<sub>3</sub>) δ 147.4, 143.1, 7.3, 3.6.

**MS** (ESI) *m/z* (relative intensity) 256.61 (1.0), 115.16 (100) [M]<sup>+</sup>.

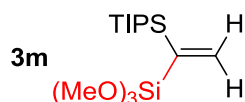

**Triisopropyl(1-(trimethoxysilyl)vinyl)silane (3m)** was prepared as colorless oil from ethynyltriisopropylsilane (0.40 mmol, 73.0 mg) and (MeO)<sub>3</sub>SiH (0.60 mmol, 73.3 mg) according to the General Procedure in 84% yield (102.3 mg, 84%, α/β > 50:1).

**<sup>1</sup>H NMR** (400 MHz, CDCl<sub>3</sub>) δ 6.75 (d, *J* = 5.2 Hz, 1 H), 6.51 (d, *J* = 5.2 Hz, 1 H), 3.54 (s, 9 H), 1.18-1.29 (m, 3 H), 1.04 (d, *J* = 4.4 Hz, 18 H).

**<sup>13</sup>C NMR** (100MHz, CDCl<sub>3</sub>) δ 148.4, 139.9, 50.5, 18.6, 11.2.

**HRMS** *m/z* (CI) calcd. for C<sub>14</sub>H<sub>31</sub>O<sub>3</sub>Si<sub>2</sub> (M-H)<sup>+</sup> 303.1811, found 303.1850.

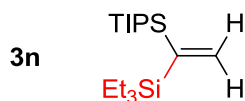

**Triethyl(1-(triisopropylsilyl)vinyl)silane (3n)** was prepared as colorless oil from ethynyltriisopropylsilane (0.40 mmol, 73.0 mg) and Et<sub>3</sub>SiH (0.60 mmol, 69.8 mg) according to the General Procedure in 42% yield (50.2 mg, 42%,  $\alpha/\beta > 50:1$ ).

<sup>1</sup>H NMR (400 MHz, CDCl<sub>3</sub>)  $\delta$  6.50 (d,  $J = 4.8$  Hz, 1 H), 6.46 (d,  $J = 4.8$  Hz, 1 H), 1.15-1.23 (m, 3 H), 1.05 (d,  $J = 7.2$  Hz, 18 H), 0.92 (t,  $J = 8.0$  Hz, 9 H). 0.86 (q,  $J = 8.0$  Hz, 6 H).

<sup>13</sup>C NMR (100MHz, CDCl<sub>3</sub>)  $\delta$  145.2, 145.1, 19.3, 11.6, 7.4, 4.1.

MS (ESI)  $m/z$  (relative intensity) 298.24 (0.1), 59.09 (100) [M]<sup>+</sup>.

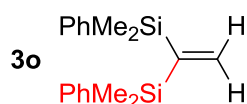

**Ethene-1,1-diylbis(dimethyl(phenyl)silane) (3o)** was prepared as colorless oil from ethynyldimethyl(phenyl)silane (0.40 mmol, 64.1 mg) and PhMe<sub>2</sub>SiH (0.60 mmol, 81.8 mg) according to the General Procedure in 94% yield (111.5 mg, 94%,  $\alpha/\beta > 50:1$ ).

<sup>1</sup>H NMR (400 MHz, CDCl<sub>3</sub>)  $\delta$  7.60-7.55 (m, 4 H), 7.49-7.42 (m, 6 H), 6.58 (s, 2 H), 0.42 (s, 12 H).

<sup>13</sup>C NMR (100 MHz, CDCl<sub>3</sub>)  $\delta$  150.9, 143.9, 138.8, 134.0, 128.8, 127.6, -1.8.

HRMS  $m/z$  (CI) calcd. for C<sub>18</sub>H<sub>25</sub>Si<sub>2</sub> (M+H)<sup>+</sup> 297.1495, found 297.1506.

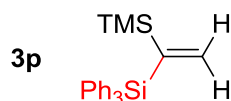

**Trimethyl(1-(triphenylsilyl)vinyl)silane (3p)** was prepared as colorless oil from ethynyltrimethylsilane (0.40 mmol, 40.0 mg) and Ph<sub>3</sub>SiH (0.60 mmol, 156.2 mg), according to the General Procedure in 62% yield (88.9 mg, 62%,  $\alpha/\beta > 50:1$ ).

<sup>1</sup>H NMR (400 MHz, CDCl<sub>3</sub>)  $\delta$  7.60-7.55 (m, 6 H), 7.44-7.33 (m, 9 H), 6.74 (d,  $J = 4.8$  Hz, 1 H), 6.40 (d,  $J = 4.8$  Hz, 1 H), -0.10 (s, 9 H).

<sup>13</sup>C NMR (100 MHz, CDCl<sub>3</sub>)  $\delta$  149.1, 147.3, 136.5, 135.0, 129.4, 127.8, 0.0.

MS (ESI)  $m/z$  (relative intensity) 358.16(4.0), 259.32(100) [M]<sup>+</sup>.

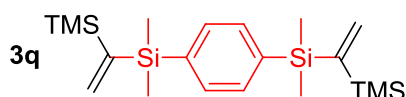



**1,4-Bis(dimethyl(1-(trimethylsilyl)vinyl)silyl)benzene (3q)** was prepared as colorless oil from ethynyltrimethylsilane (1.20 mmol, 120.0 mg) and 1,4-bis(dimethylsilyl)benzene (0.40 mmol, 77.7 mg) according to the General Procedure in 84% yield (131.3 mg, 84%,  $\alpha/\beta > 50:1$ ).

$^1\text{H NMR}$  (400 MHz,  $\text{CDCl}_3$ )  $\delta$  7.51 (s, 4 H), 6.45 (d,  $J = 5.2$  Hz, 2 H), 6.37 (d,  $J = 5.2$  Hz, 2 H), 0.4 (s, 12 H), 0.04 (s, 18 H).

$^{13}\text{C NMR}$  (100MHz,  $\text{CDCl}_3$ )  $\delta$  152.8, 141.8, 139.5, 133.2, -0.3, -1.8.

**HRMS**  $m/z$  (CI) calcd. for  $\text{C}_{20}\text{H}_{39}\text{Si}_4$  ( $\text{M}+\text{H}$ ) $^+$  391.2130, found 391.2182.

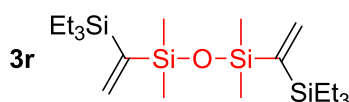

**1,1,3,3-Tetramethyl-1,3-bis(1-(triethylsilyl)vinyl)disiloxane (3r)** was prepared as colorless oil from triethyl(ethynyl)silane (1.20 mmol, 168.6 mg) and 1,1,3,3-tetramethyldisiloxane (0.40 mmol, 54.0 mg) according to the General Procedure in 70% yield (116.2 mg, 70%,  $\alpha/\beta > 50:1$ ).

$^1\text{H NMR}$  (400 MHz,  $\text{CDCl}_3$ )  $\delta$  6.50 (d,  $J = 5.2$  Hz, 2 H), 6.33 (d,  $J = 5.2$  Hz, 2 H), 0.95 (t,  $J = 8.0$  Hz, 18 H), 0.67 (q,  $J = 8.0$  Hz, 12 H), 0.2 (s, 12 H).

$^{13}\text{C NMR}$  (100MHz,  $\text{CDCl}_3$ )  $\delta$  150.8, 142.2, 7.1, 3.8, 1.6.

**HRMS**  $m/z$  (CI) calcd. for  $\text{C}_{20}\text{H}_{47}\text{OSi}_4$  ( $\text{M}+\text{H}$ ) $^+$  415.2704, found 415.2668.

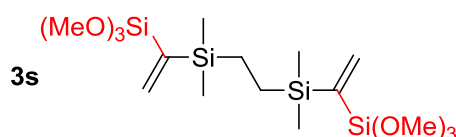

**3,3,10,10-Tetramethoxy-5,5,8,8-tetramethyl-4,9-dimethylene-2,11-dioxo-3,5,8,10-tetrasiladodecane (3s)** was prepared as colorless oil from 1,2-bis(ethynyldimethylsilyl)ethane (0.40 mmol, 77.8 mg) and  $(\text{MeO})_3\text{SiH}$  (1.20 mmol, 146.6 mg) according to the General Procedure in 58% yield (101.8 mg, 58%,  $\alpha/\beta > 50:1$ ).

$^1\text{H NMR}$  (400 MHz,  $\text{CDCl}_3$ )  $\delta$  6.58 (d,  $J = 5.6$  Hz, 2 H), 6.43 (d,  $J = 5.6$  Hz, 2 H), 3.52 (s, 18 H), 0.5 (s, 4 H), 0.07 (s, 12 H).

$^{13}\text{C NMR}$  (100MHz,  $\text{CDCl}_3$ )  $\delta$  146.0, 144.1, 50.4, 37.2, 3.7.

**HRMS**  $m/z$  (CI) calcd. for  $\text{C}_{16}\text{H}_{38}\text{KO}_6\text{Si}_4$  ( $\text{M}+\text{K}$ ) $^+$  477.1383, found 477.1380.

### III. Derivatizations of the Hydrosilylation Products

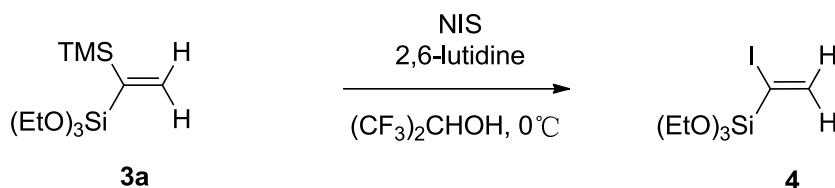

**Triethoxy(1-iodovinyl)silane (4).** To an oven-dried 5-mL vial was added **3a** (54 mg, 0.20 mmol), 2,6-lutidine (12  $\mu\text{L}$ , 0.10 mmol), and  $(\text{CF}_3)_2\text{CHOH}$  (1.0 mL). The reaction mixture was cooled to  $0^\circ\text{C}$ , and N-iodosuccinimide (0.25 mmol) was added in one portion. The reaction mixture was stirred for 1 h under air, and then concentrated under reduced pressure. The residue was purified by silica gel flash column chromatography (eluent: hexanes) to give the desired product **4** as pale yellow oil (38.0 mg, 60%).

$^1\text{H NMR}$  (400 MHz,  $\text{CDCl}_3$ )  $\delta$  7.13-7.12 (m, 1 H), 6.89-6.87 (m, 1 H), 3.89 (q,  $J = 7.2$  Hz, 6 H), 1.25 (t,  $J = 7.2$  Hz, 9 H).

$^{13}\text{C NMR}$  (100 MHz,  $\text{CDCl}_3$ )  $\delta$  143.7, 102.9, 60.2, 18.7.

**HRMS**  $m/z$  (CI) calcd. for  $\text{C}_8\text{H}_{18}\text{IO}_3\text{Si}$  ( $\text{M}+\text{H}$ ) $^+$  317.0071, found 317.0065.

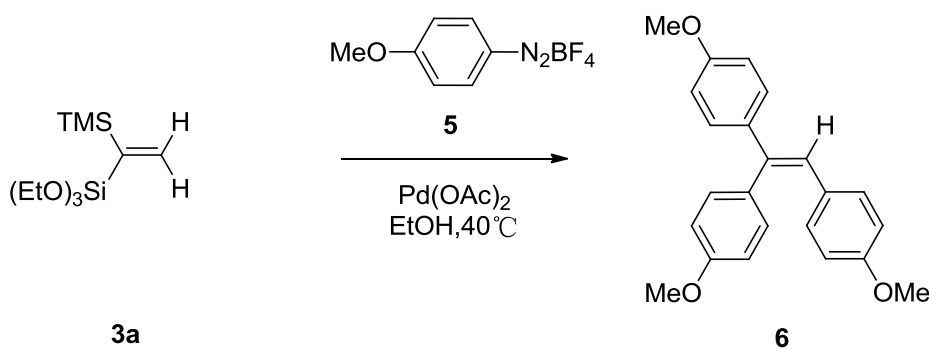

**4,4',4''-(ethene-1,1,2-triyl)tris(methoxybenzene) (6).** To an oven-dried 5-mL vial was added **3a** (104 mg, 0.40 mmol), 4-methoxybenzenediazonium tetrafluoroborate (**5**, 320 mg, 1.44 mmol),  $\text{Pd}(\text{OAc})_2$  (9.0 mg, 0.04 mmol), and EtOH (2.0 mL). The reaction mixture was stirred at  $40^\circ\text{C}$  for 4 h, and then concentrated under reduced pressure. The residue was purified by silica gel flash column chromatography (eluent: 2% EtOAc in hexanes) to give the desired product **6** as colorless oil (54.4 mg, 40%).

$^1\text{H NMR}$  (400 MHz,  $\text{CDCl}_3$ )  $\delta$  7.16 (d,  $J = 9.2$  Hz, 2 H), 7.05 (d,  $J = 8.8$  Hz, 2 H), 6.89 (t,  $J = 8.8$  Hz, 2 H), 6.81-6.74 (m, 4 H), 6.70 (s, 1 H), 6.60 (d,  $J = 8.0$  Hz, 2 H), 3.76 (s, 3 H), 3.73 (s, 3 H), 3.67 (s, 3 H).

**<sup>13</sup>C NMR** (100 MHz, CDCl<sub>3</sub>) δ 159.0, 158.8, 158.1, 139.8, 136.6, 133.0, 131.6, 130.6, 128.6, 125.8, 114.0, 113.5, 113.4, 55.3, 55.2, 55.1.

**MS** (ESI) *m/z* (relative intensity) 346.31 (100) [M]<sup>+</sup>.



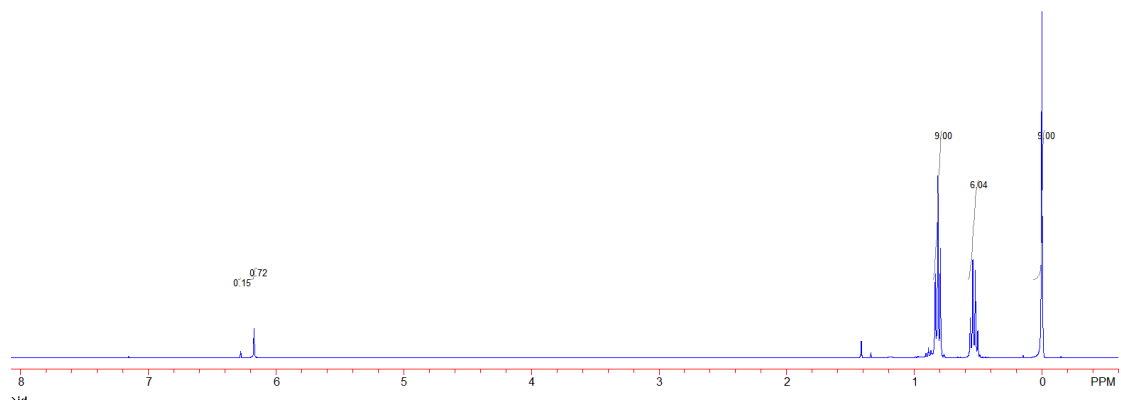

## v. $^1\text{H}$ NMR and $^{13}\text{C}$ NMR Spectra

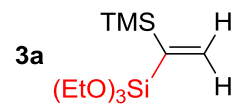

**<sup>1</sup>H NMR**

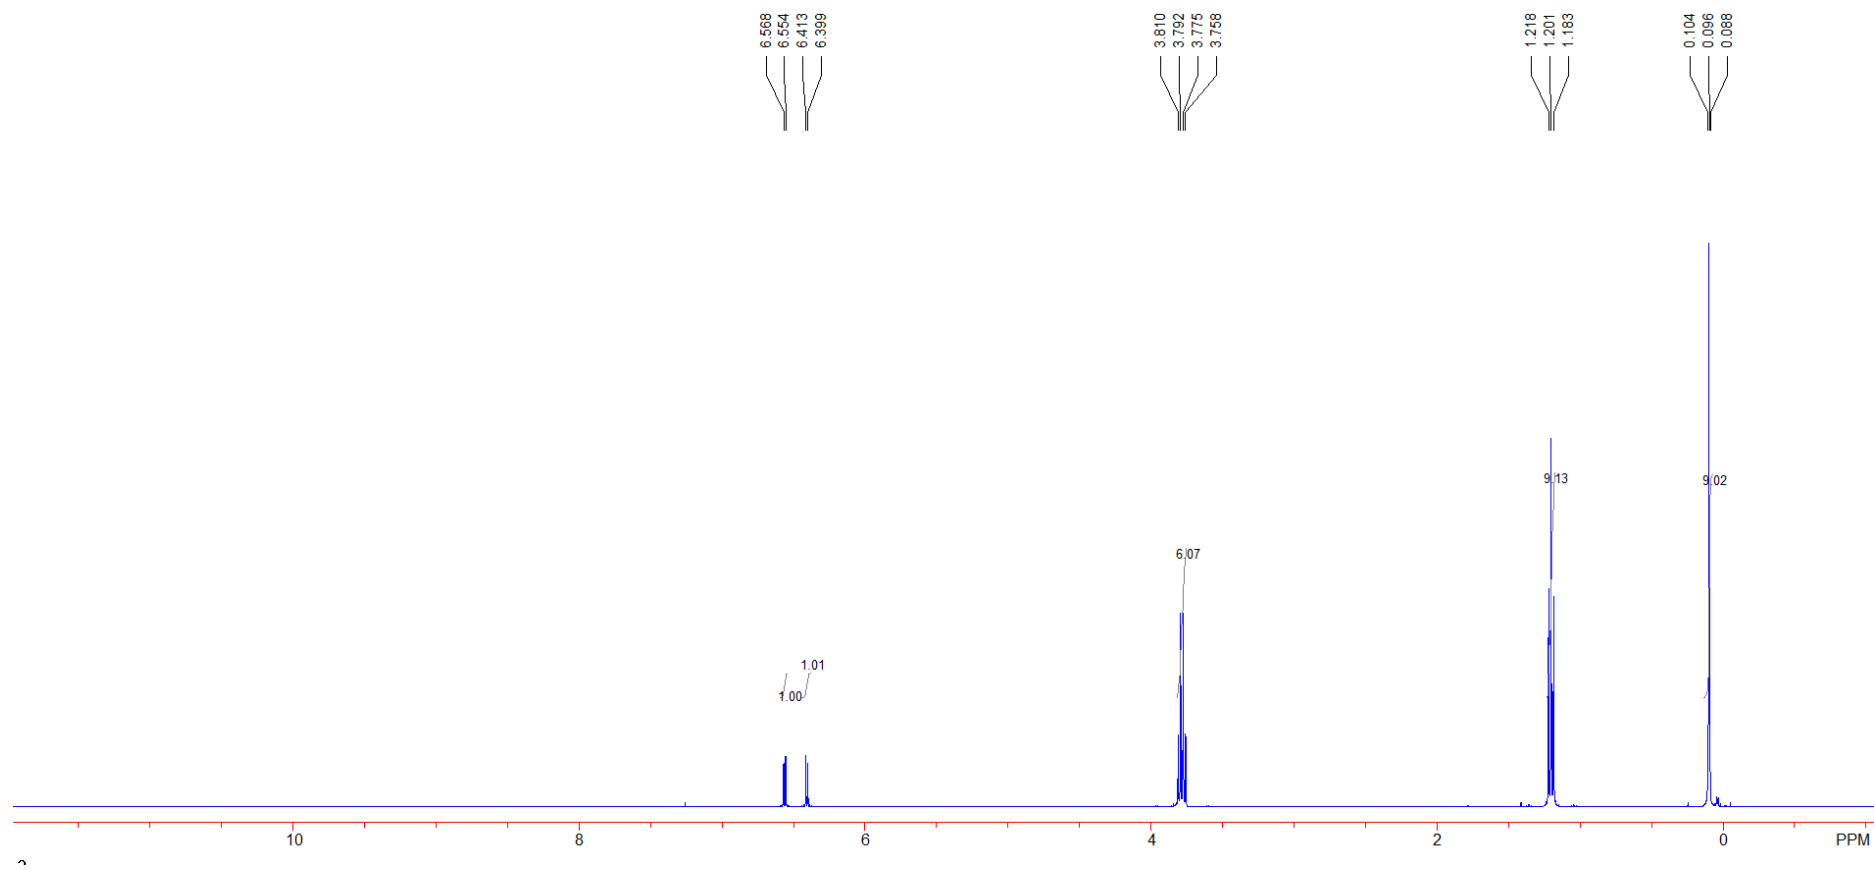



**<sup>13</sup>C NMR**

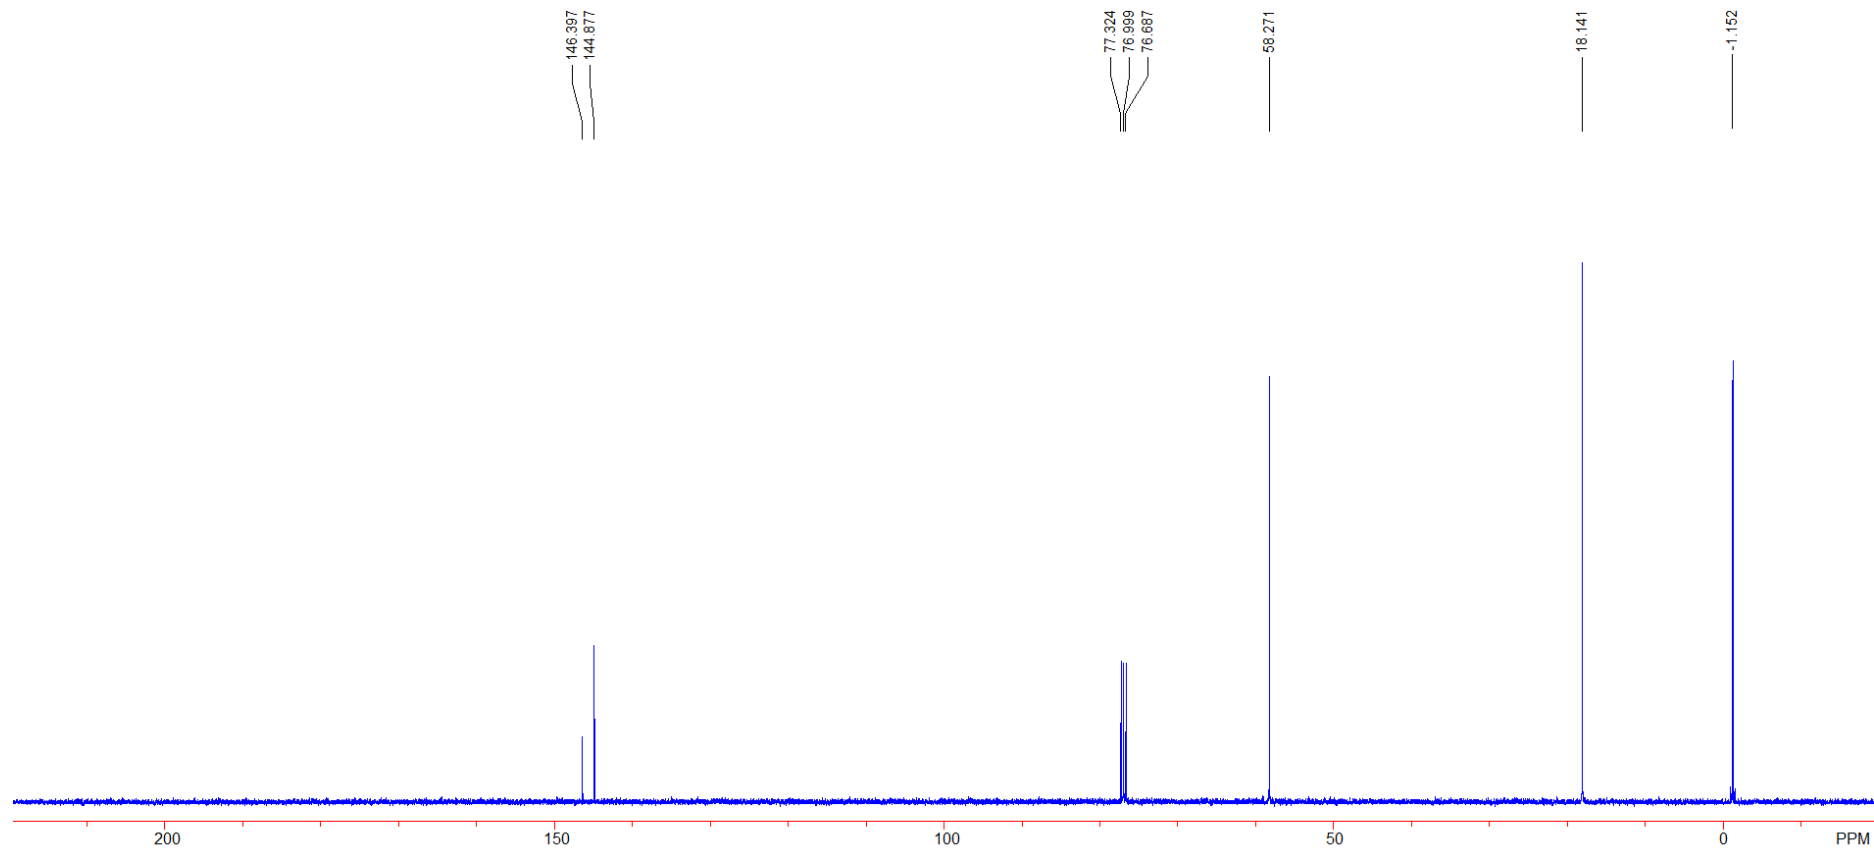





**DEPT 135**

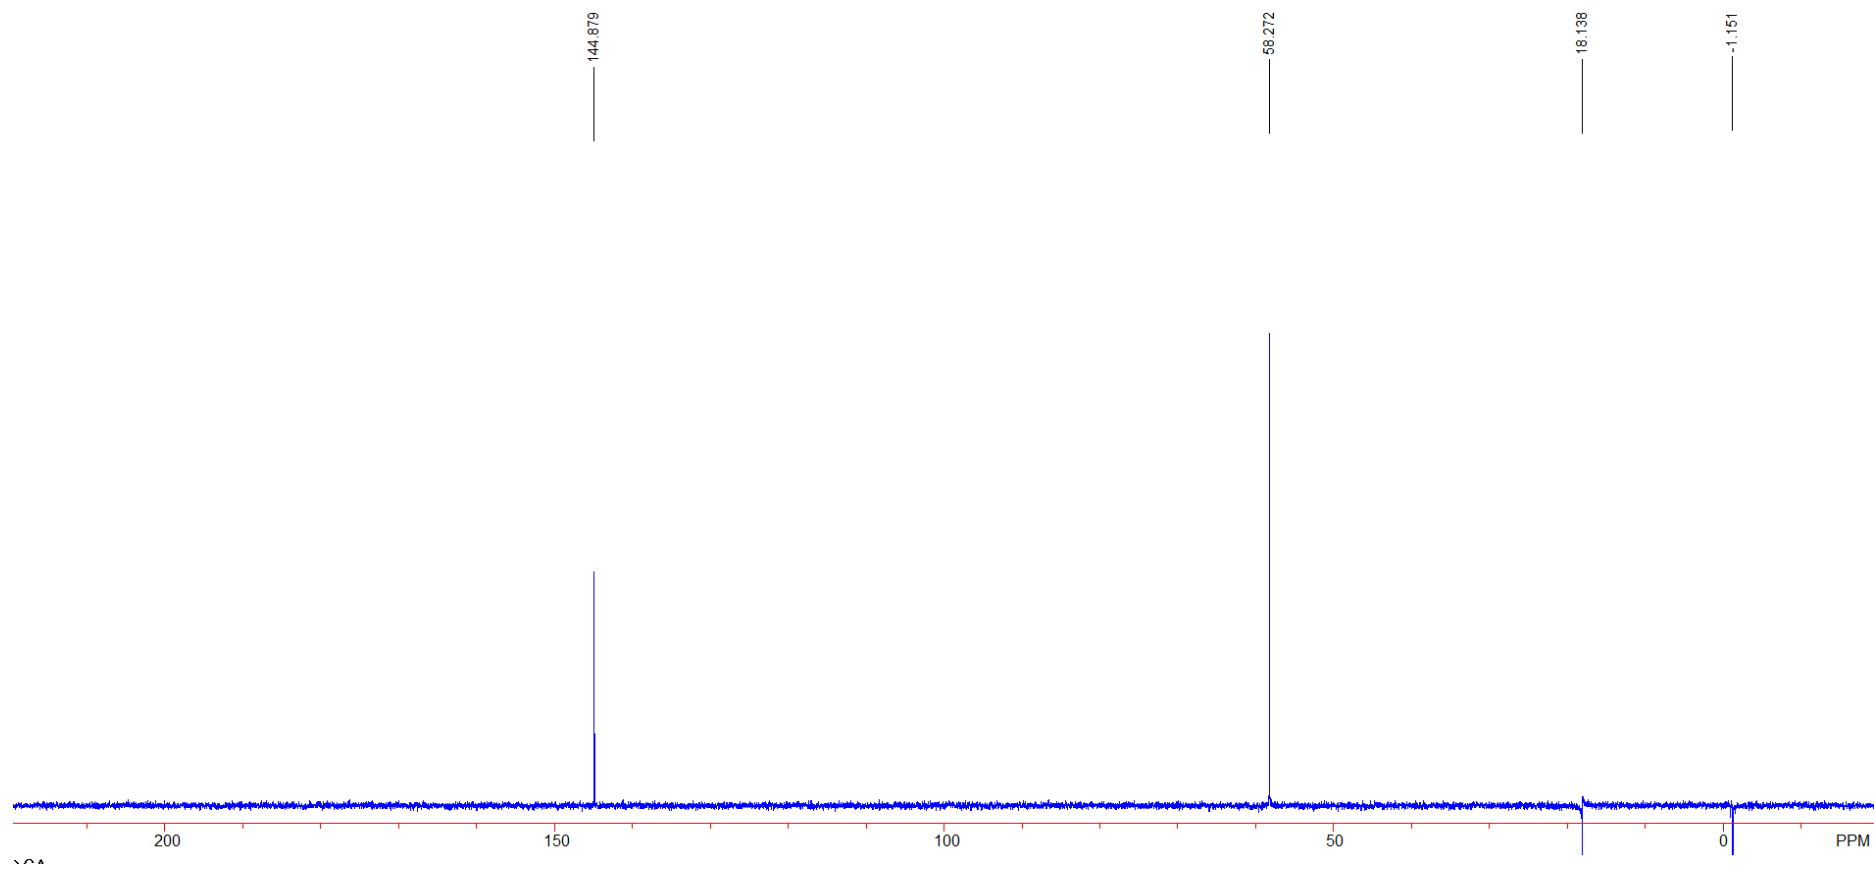

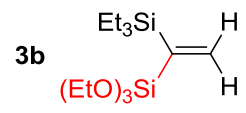

**<sup>1</sup>H NMR**

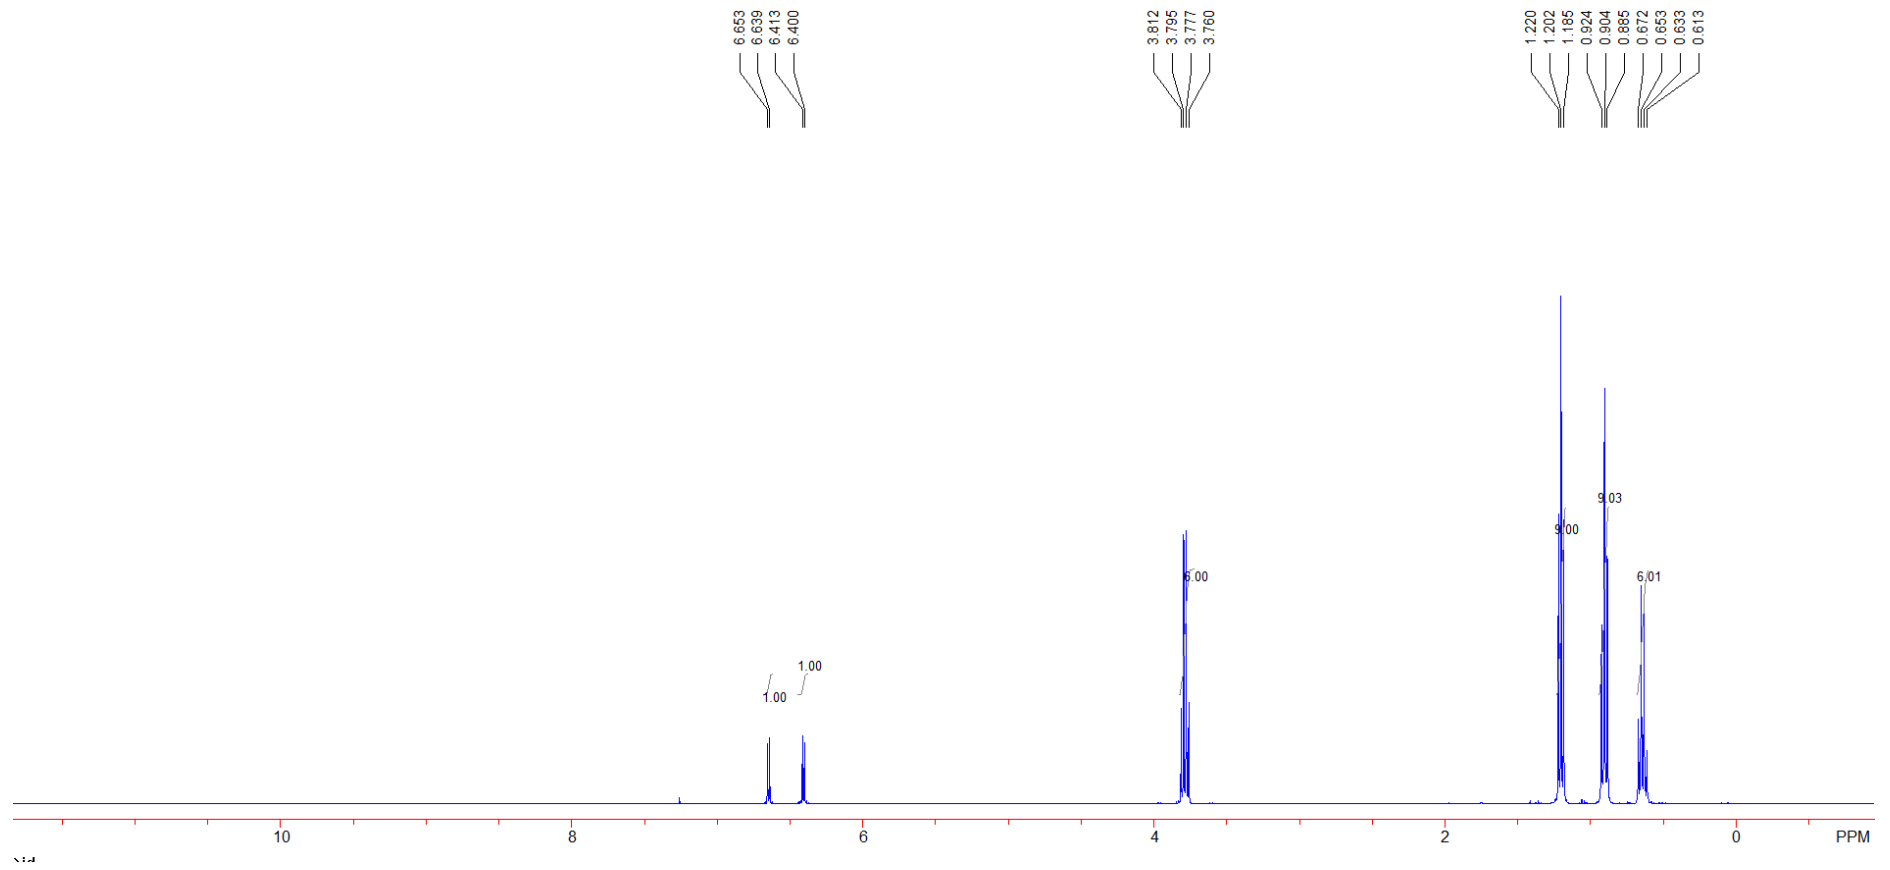



**<sup>13</sup>C NMR**

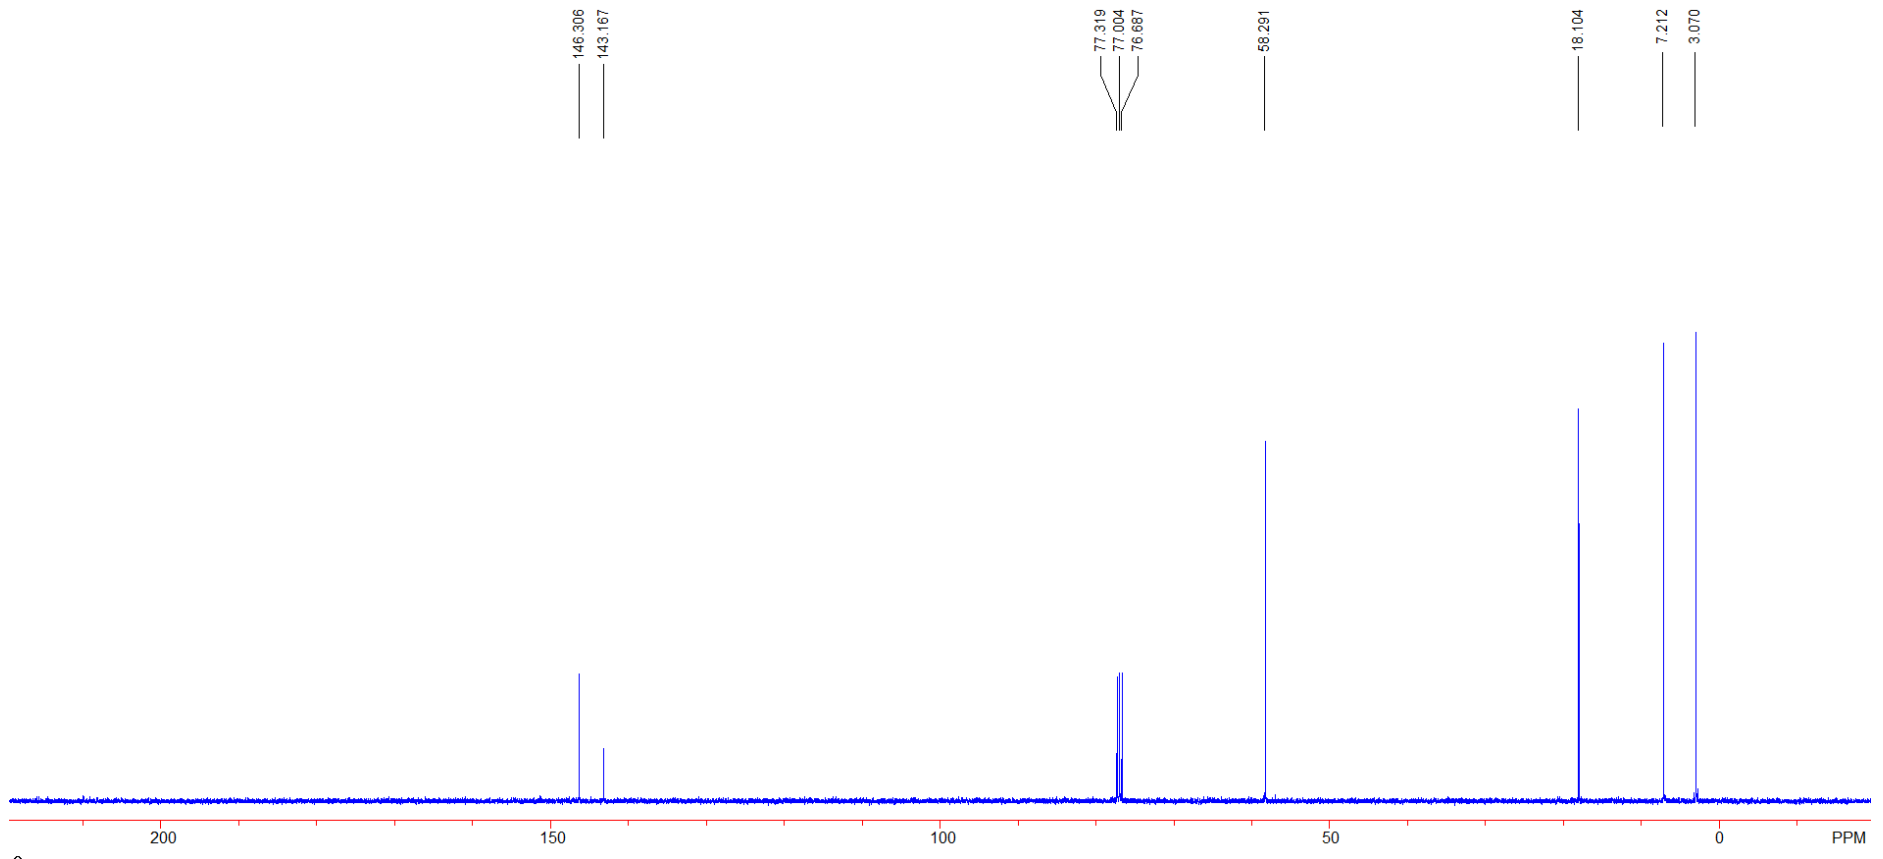

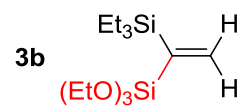

**DEPT 135**

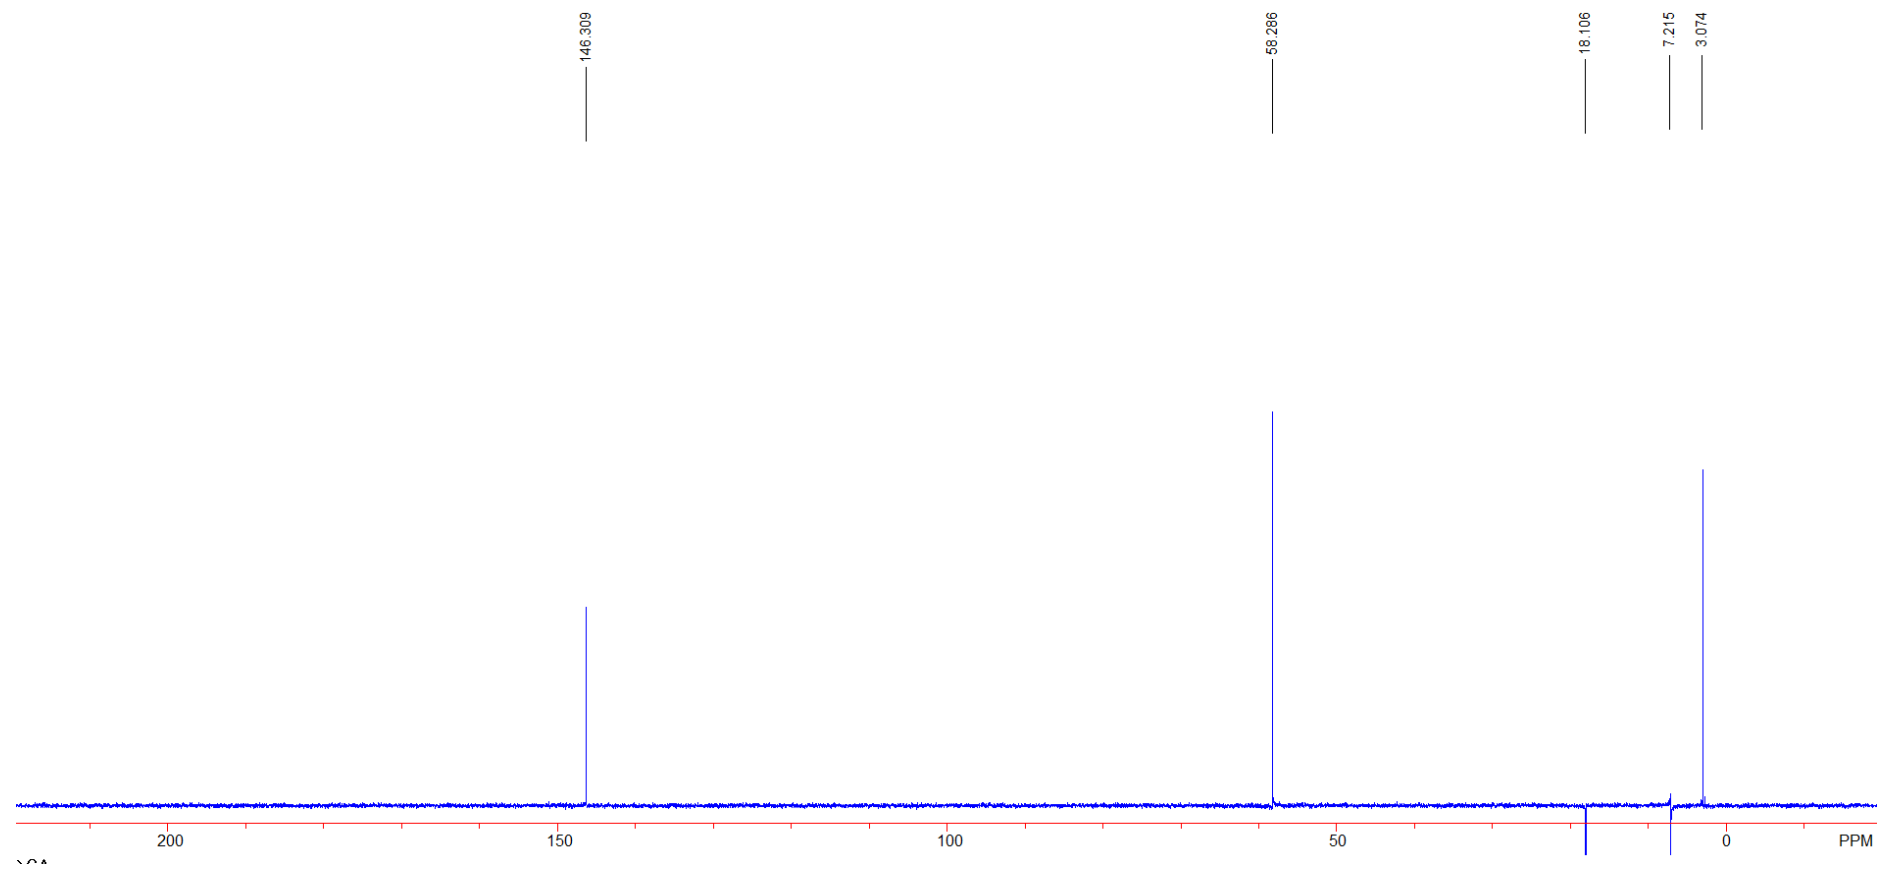

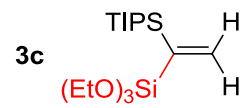

**<sup>1</sup>H NMR**

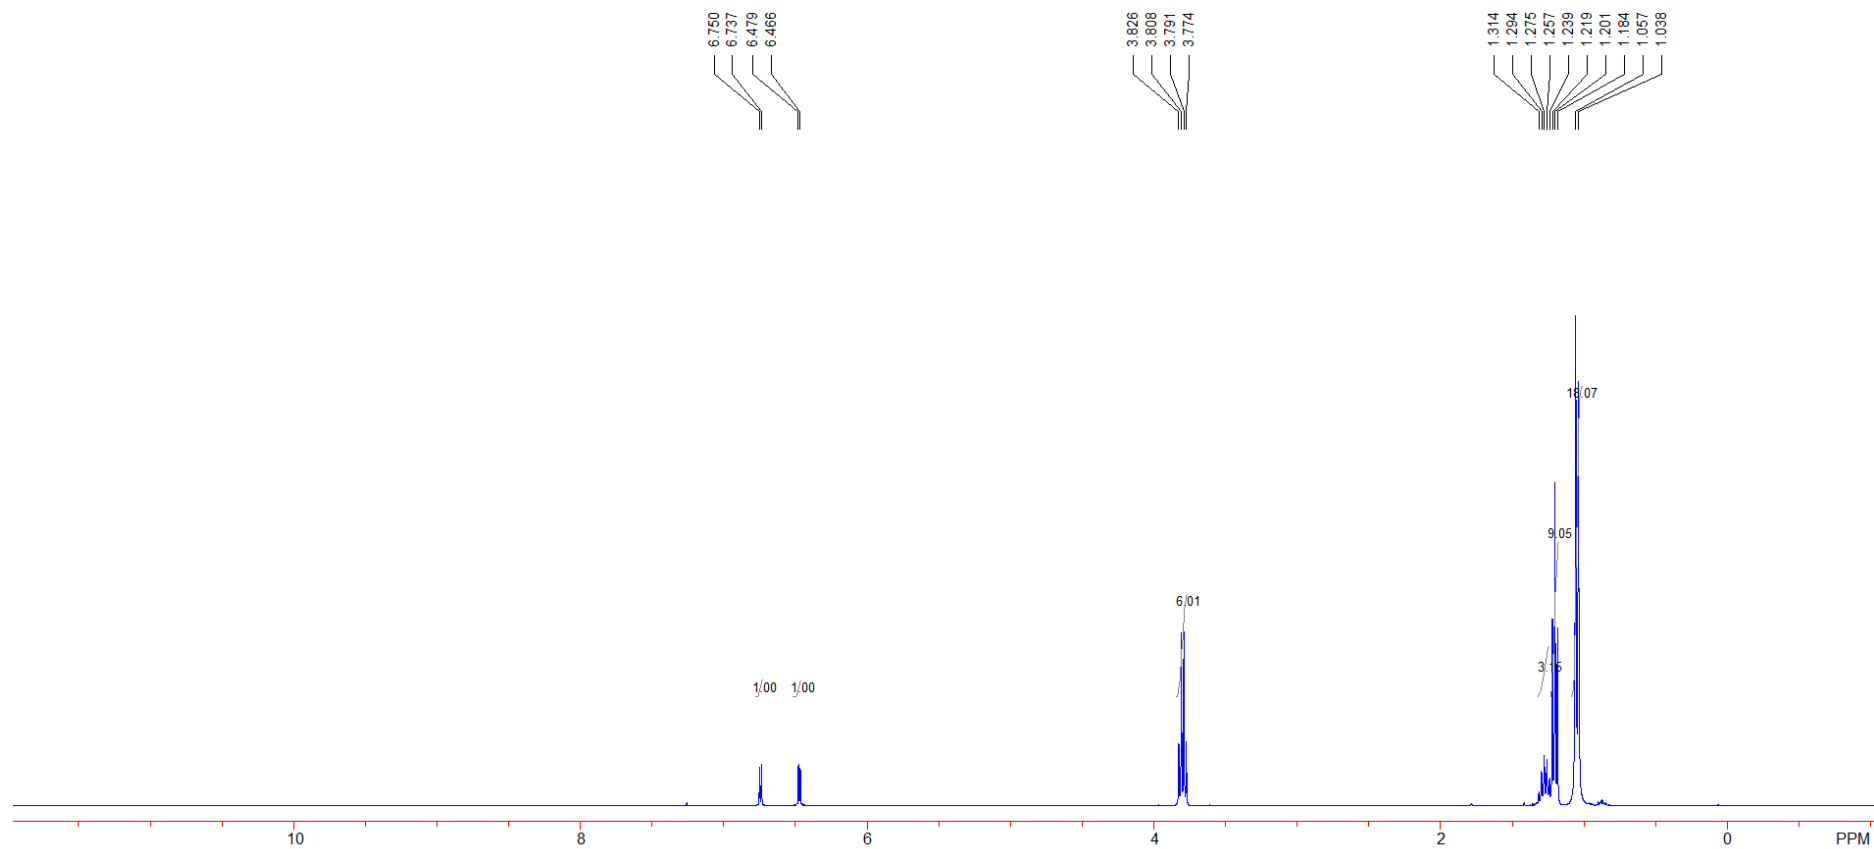

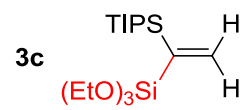

**<sup>13</sup>C NMR**

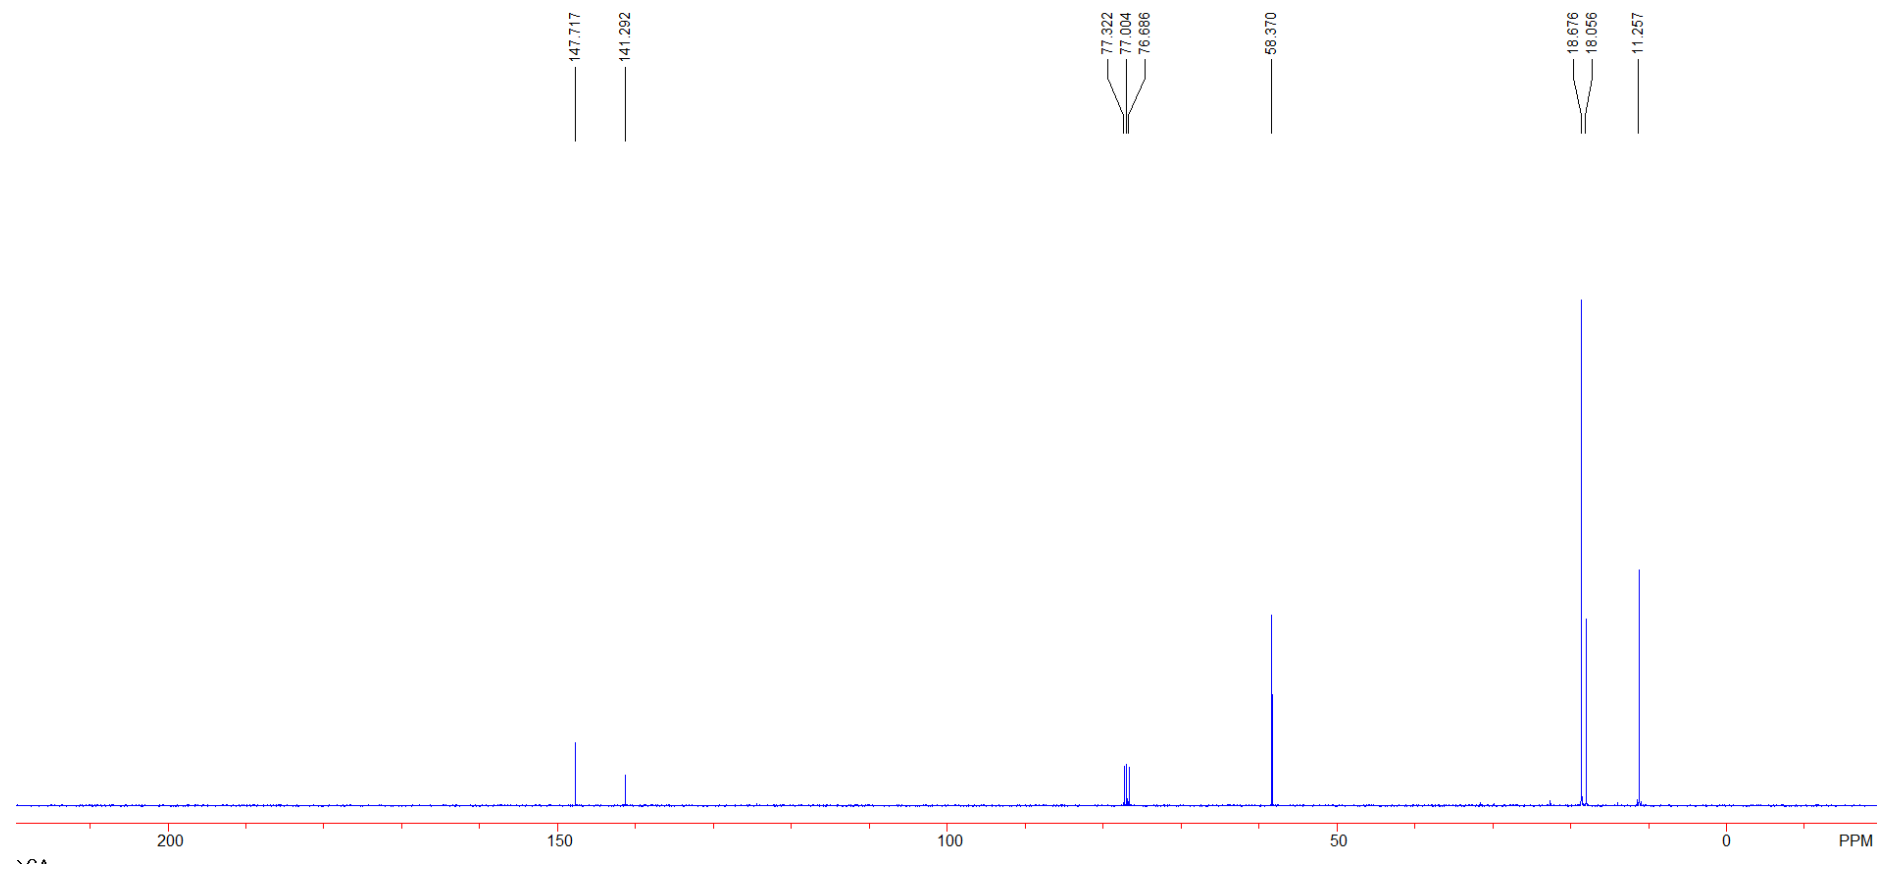



DEPT 135

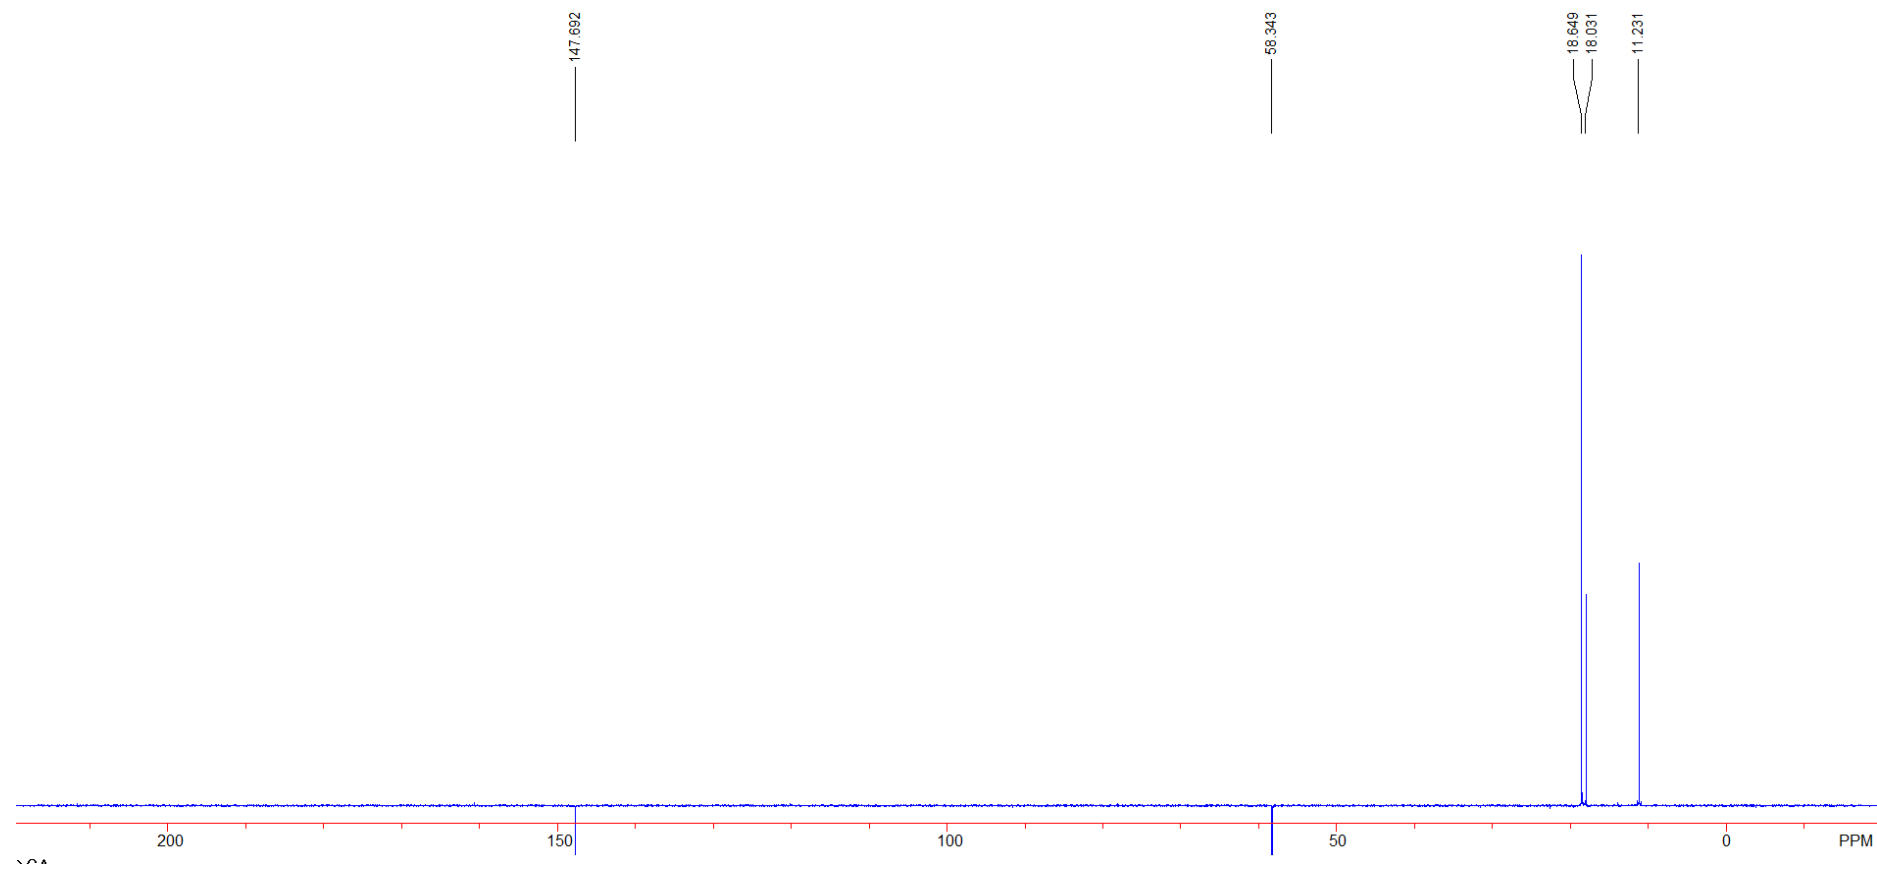

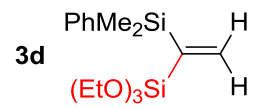

**<sup>1</sup>H NMR**

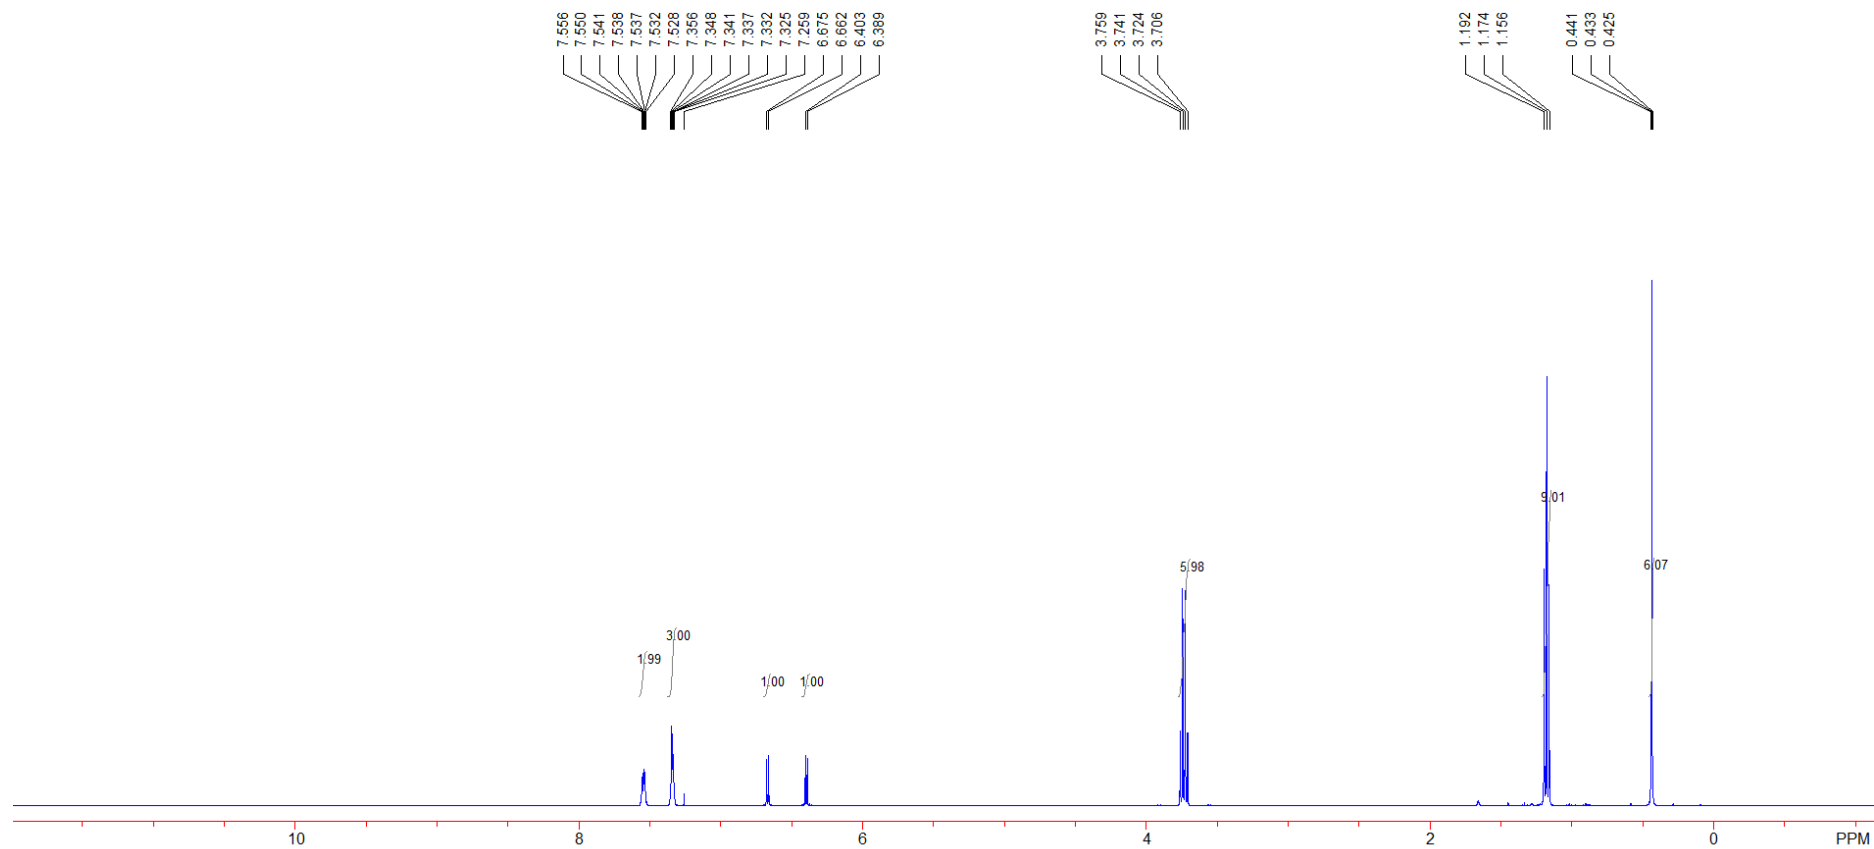



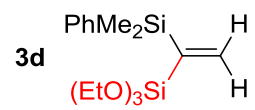

**<sup>13</sup>C NMR**

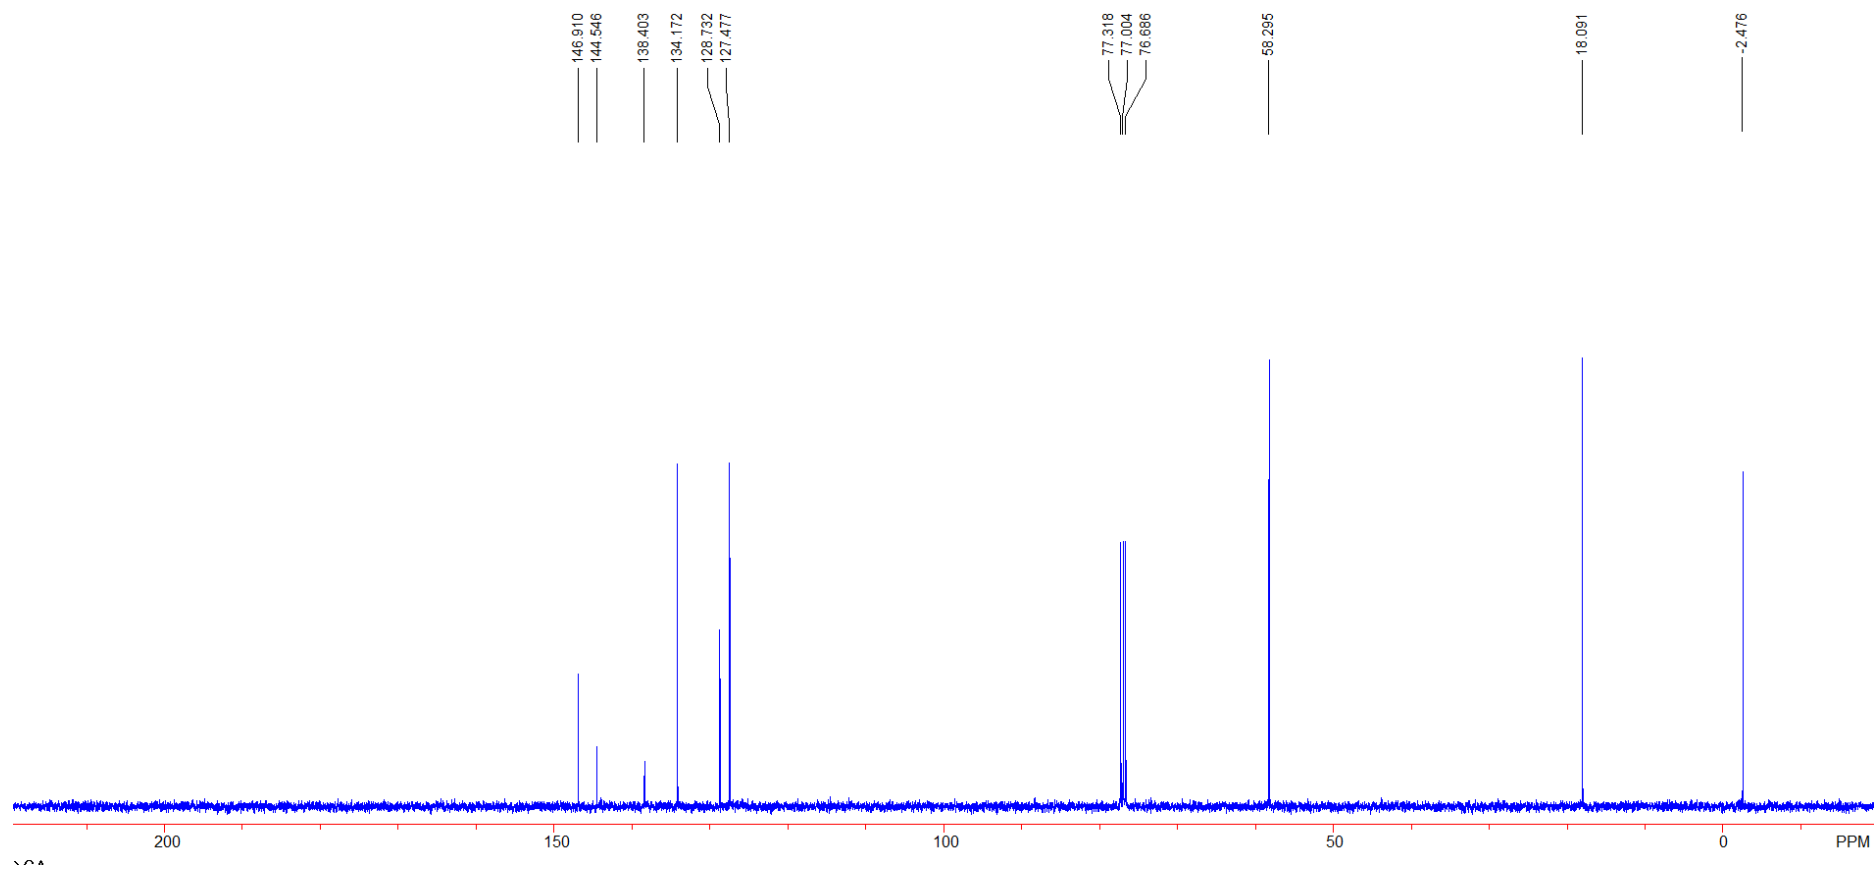

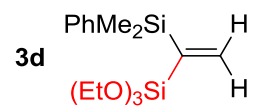

**DEPT 135**

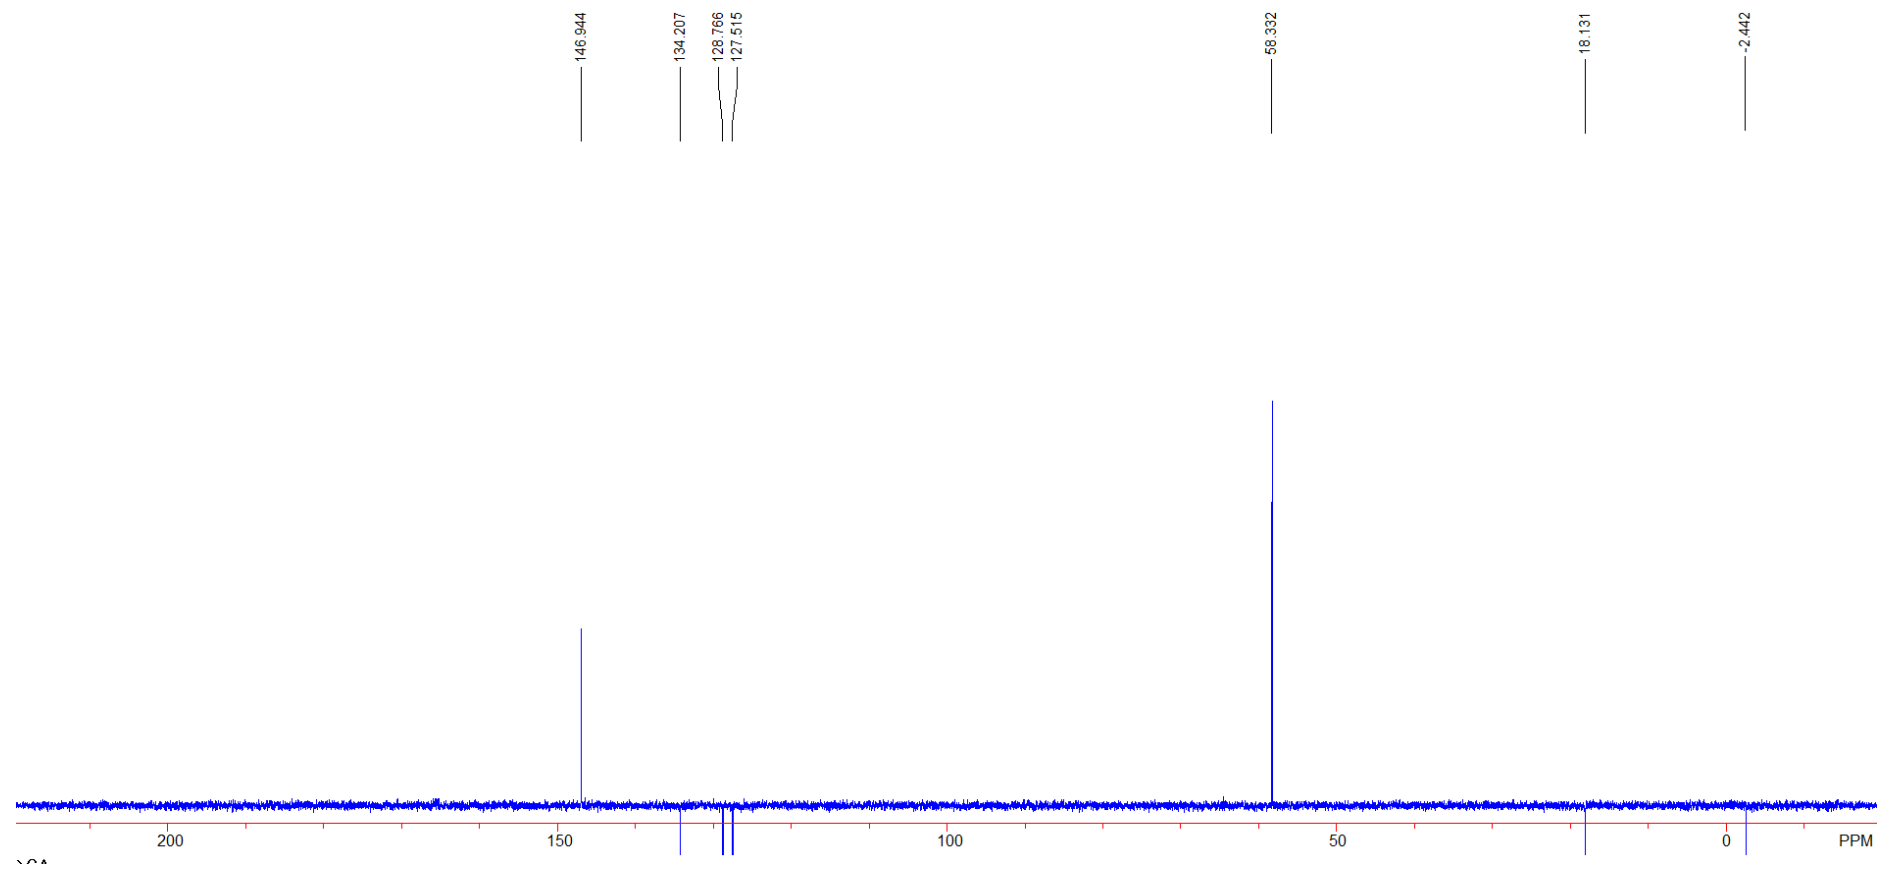

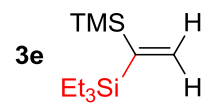

**<sup>1</sup>H NMR**

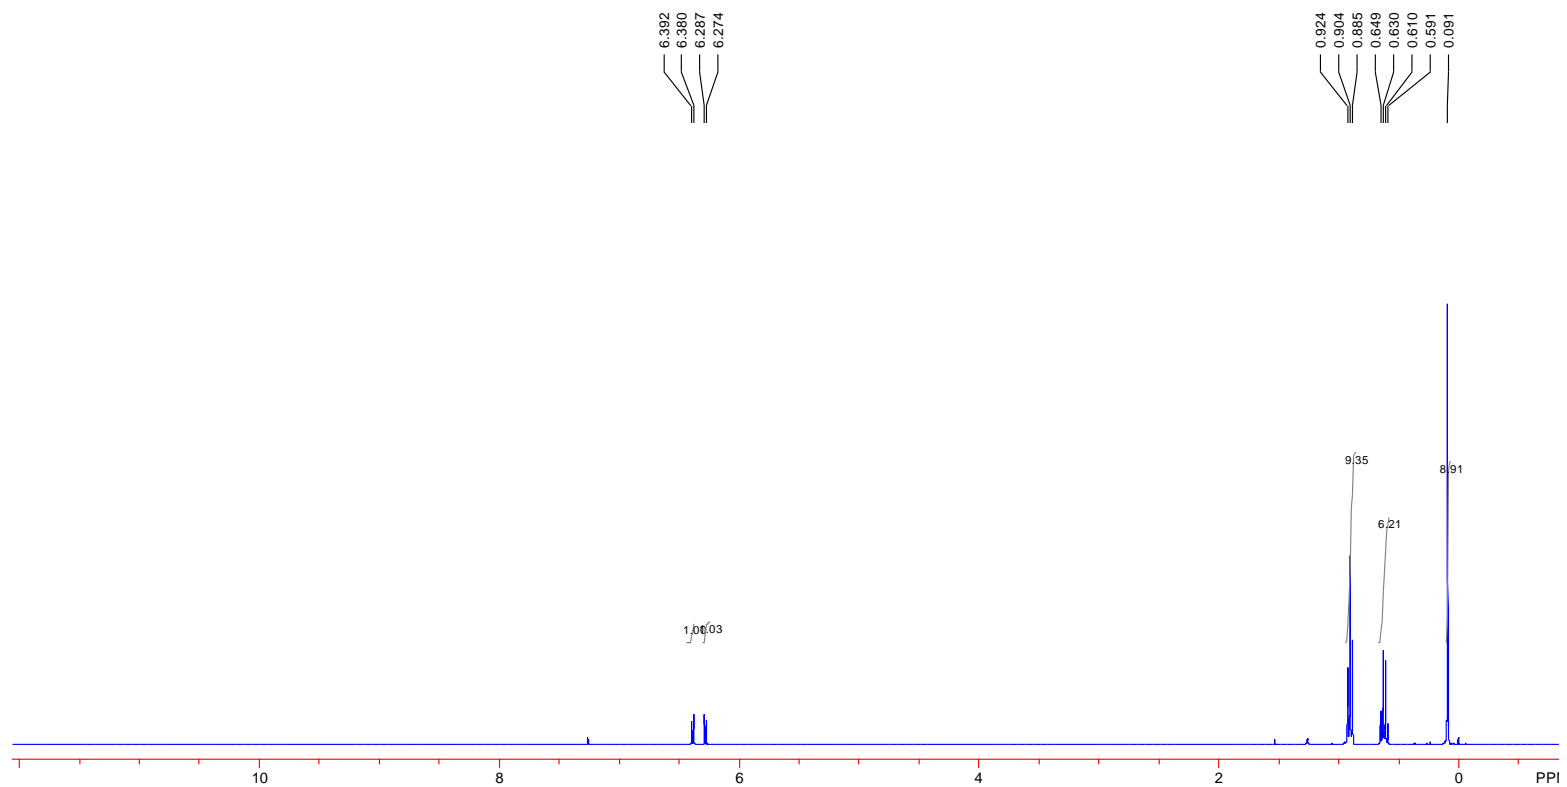



**<sup>13</sup>C NMR**

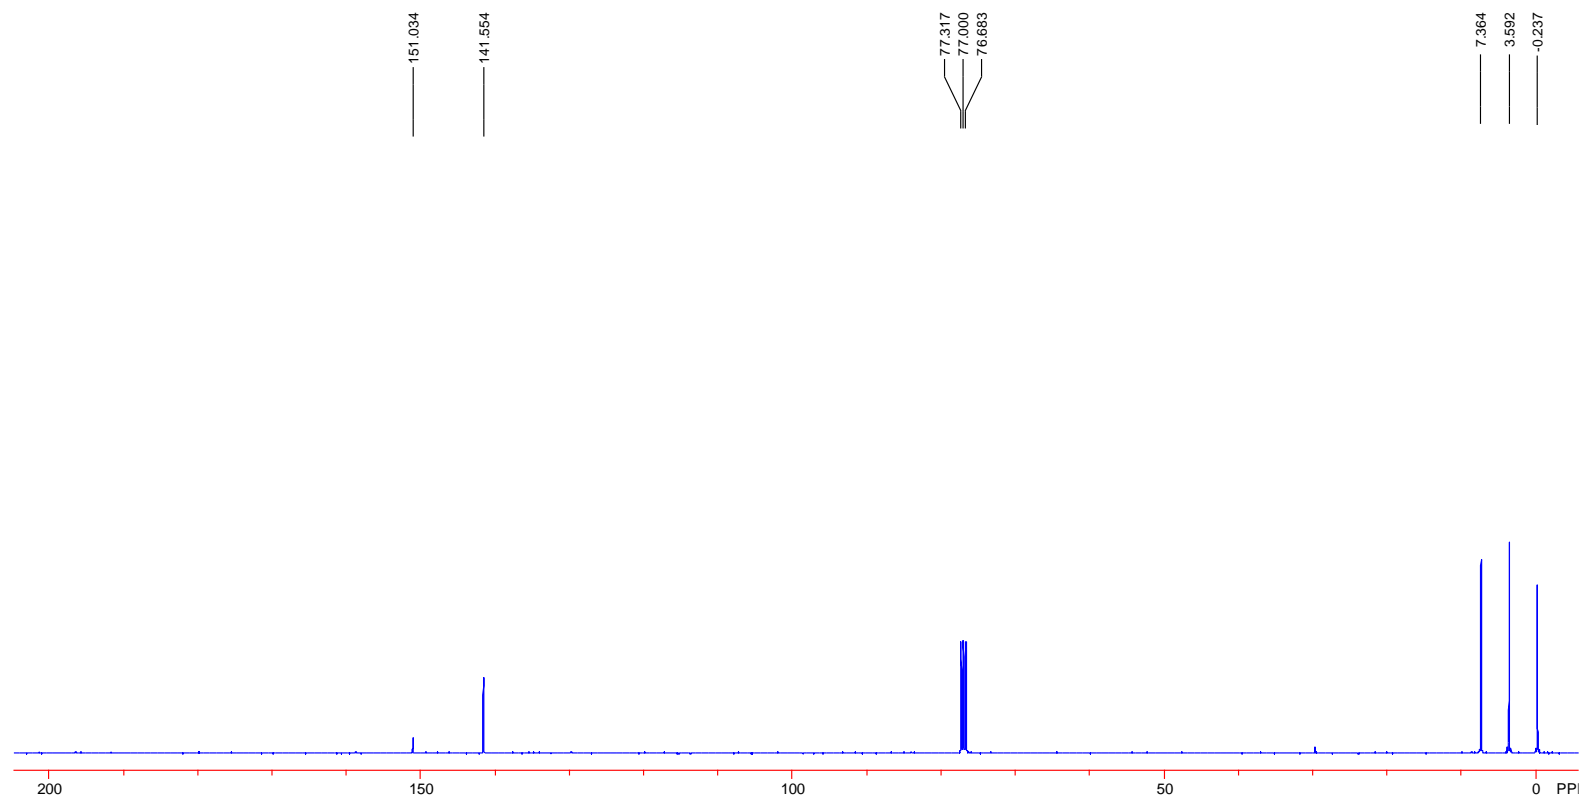

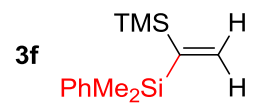

**<sup>1</sup>H NMR**

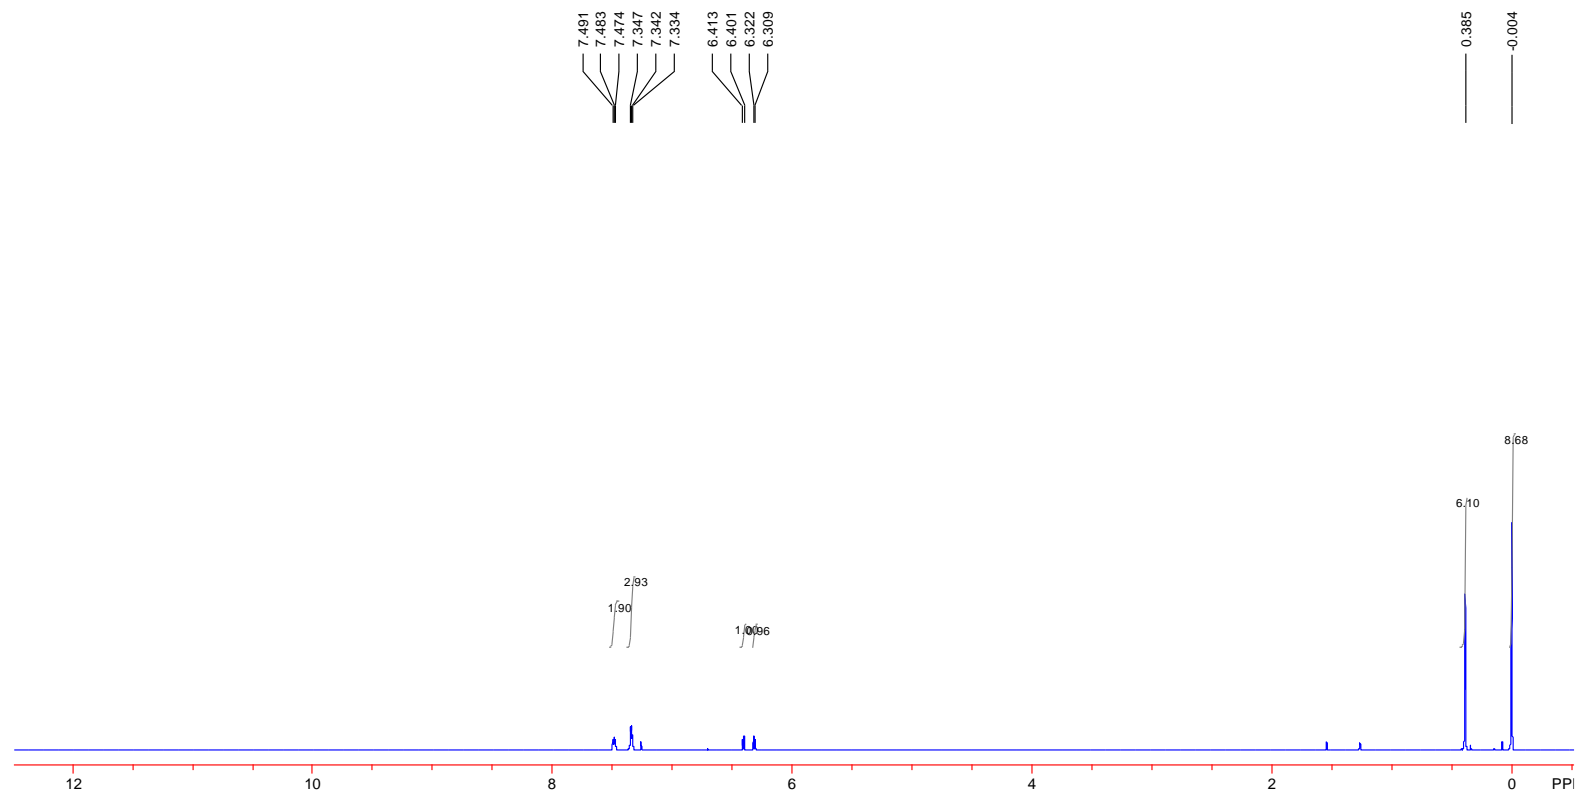

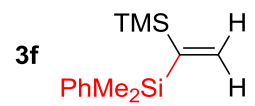

**<sup>13</sup>C NMR**

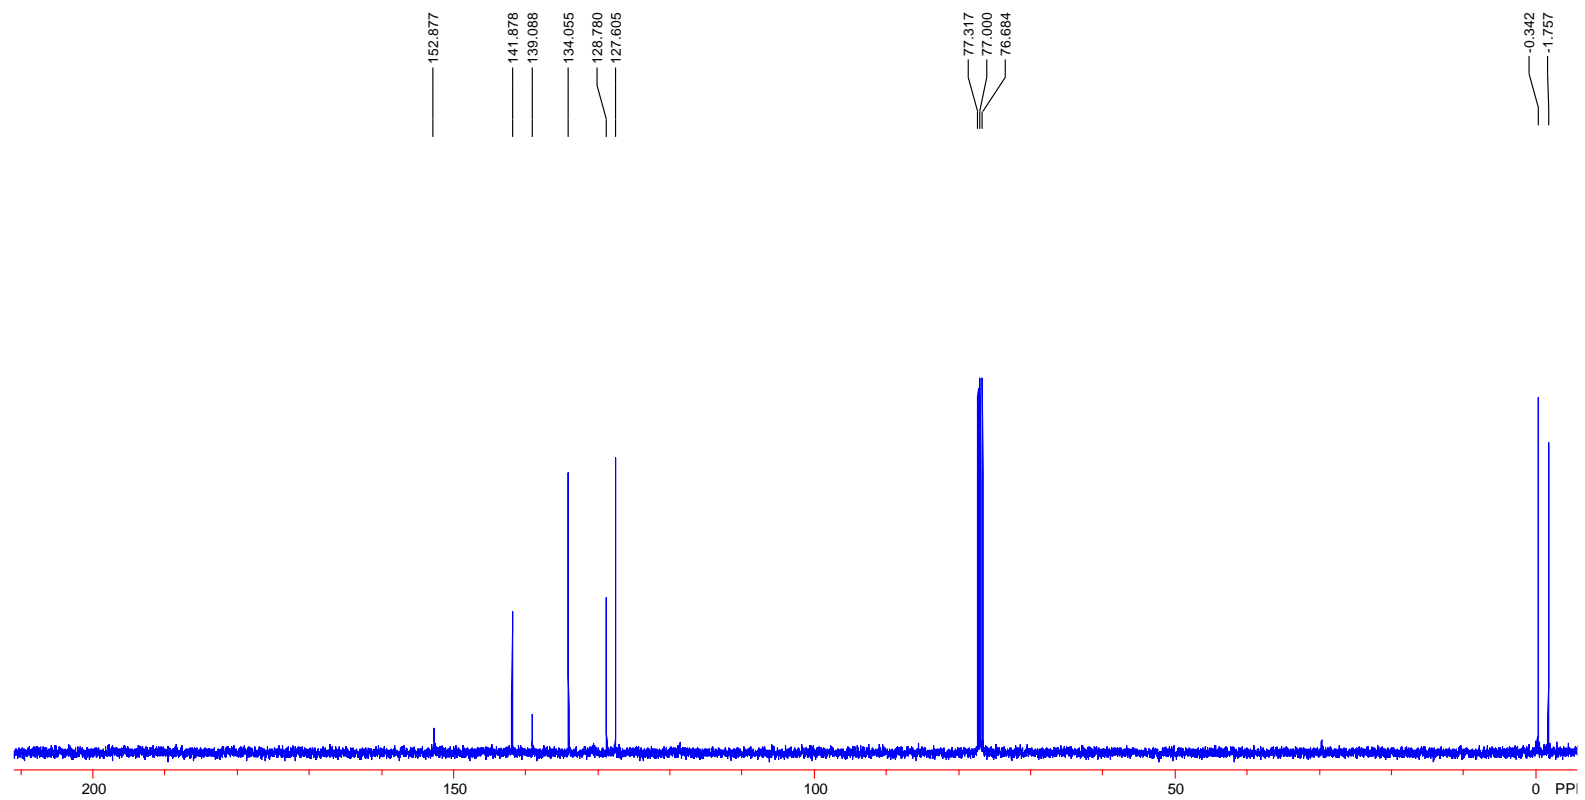



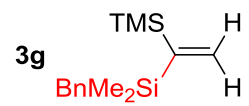

<sup>13</sup>C NMR

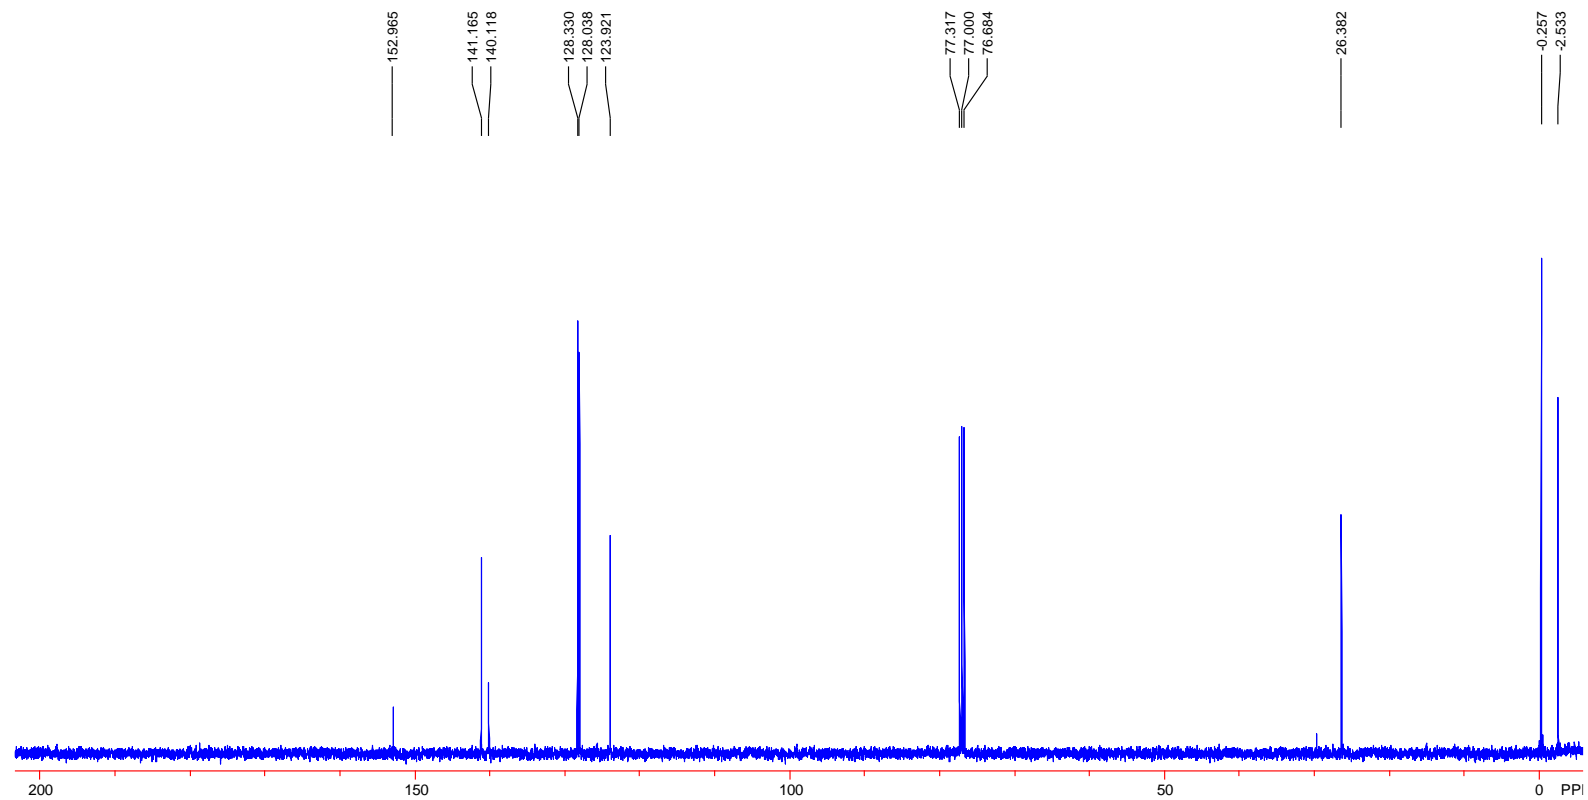



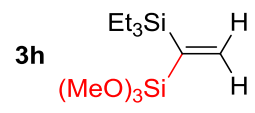

**<sup>1</sup>H NMR**

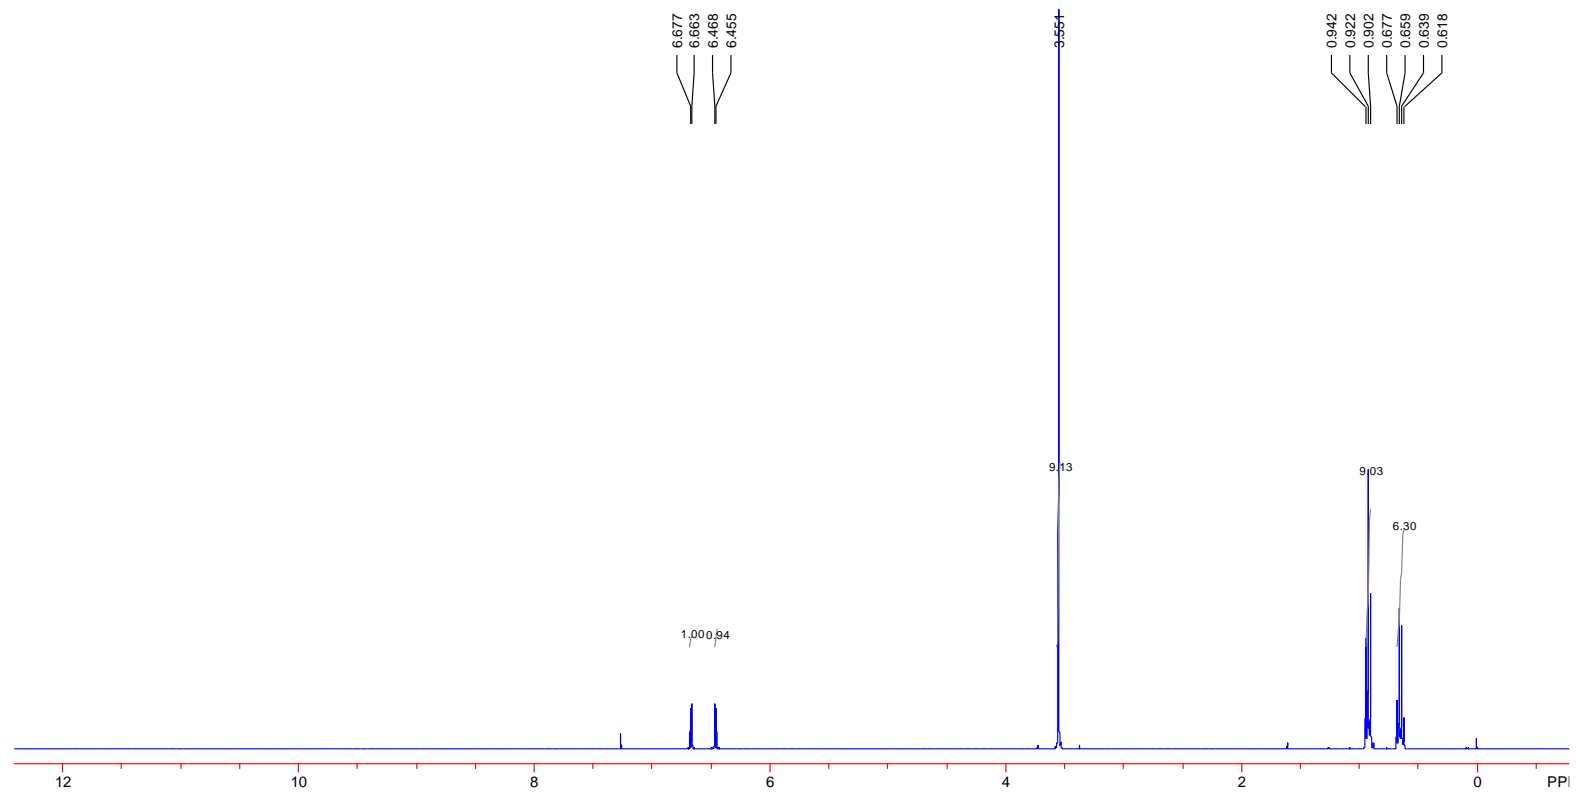



**<sup>13</sup>C NMR**

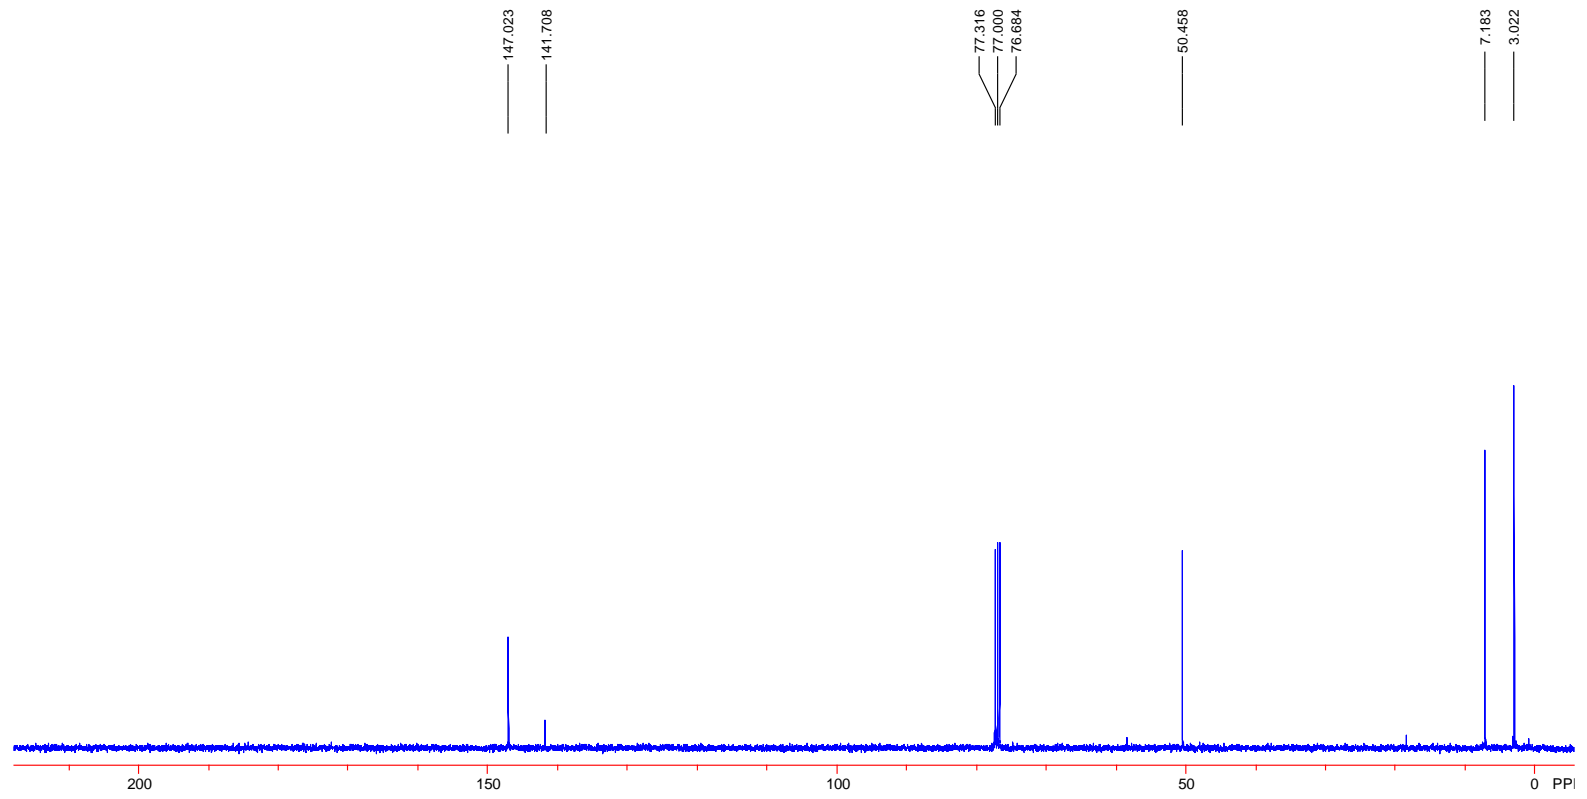

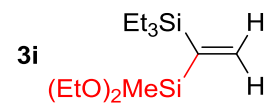

**<sup>1</sup>H NMR**

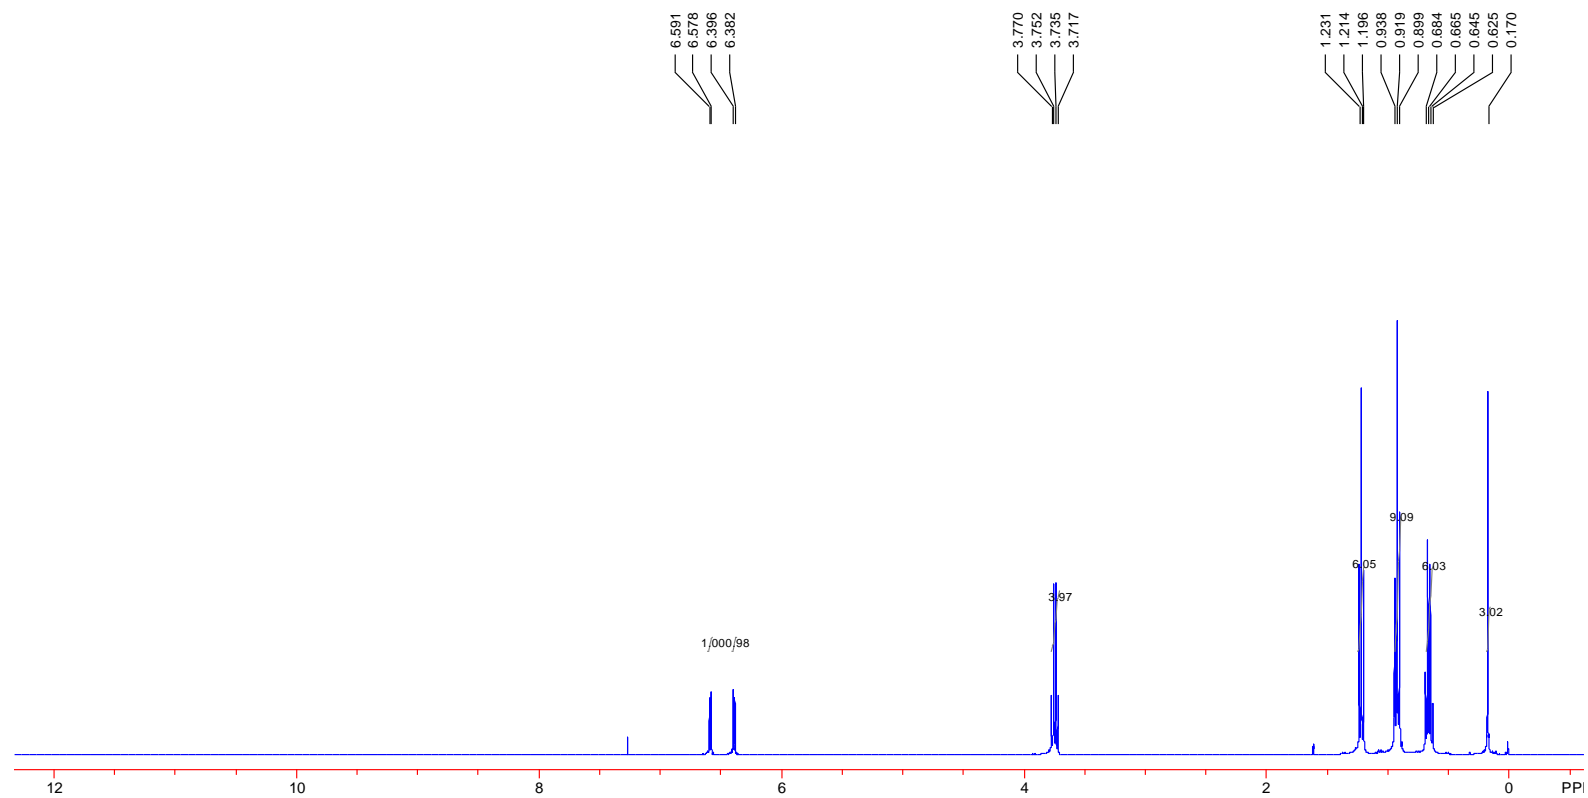

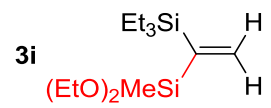

**$^{13}\text{C}$  NMR**

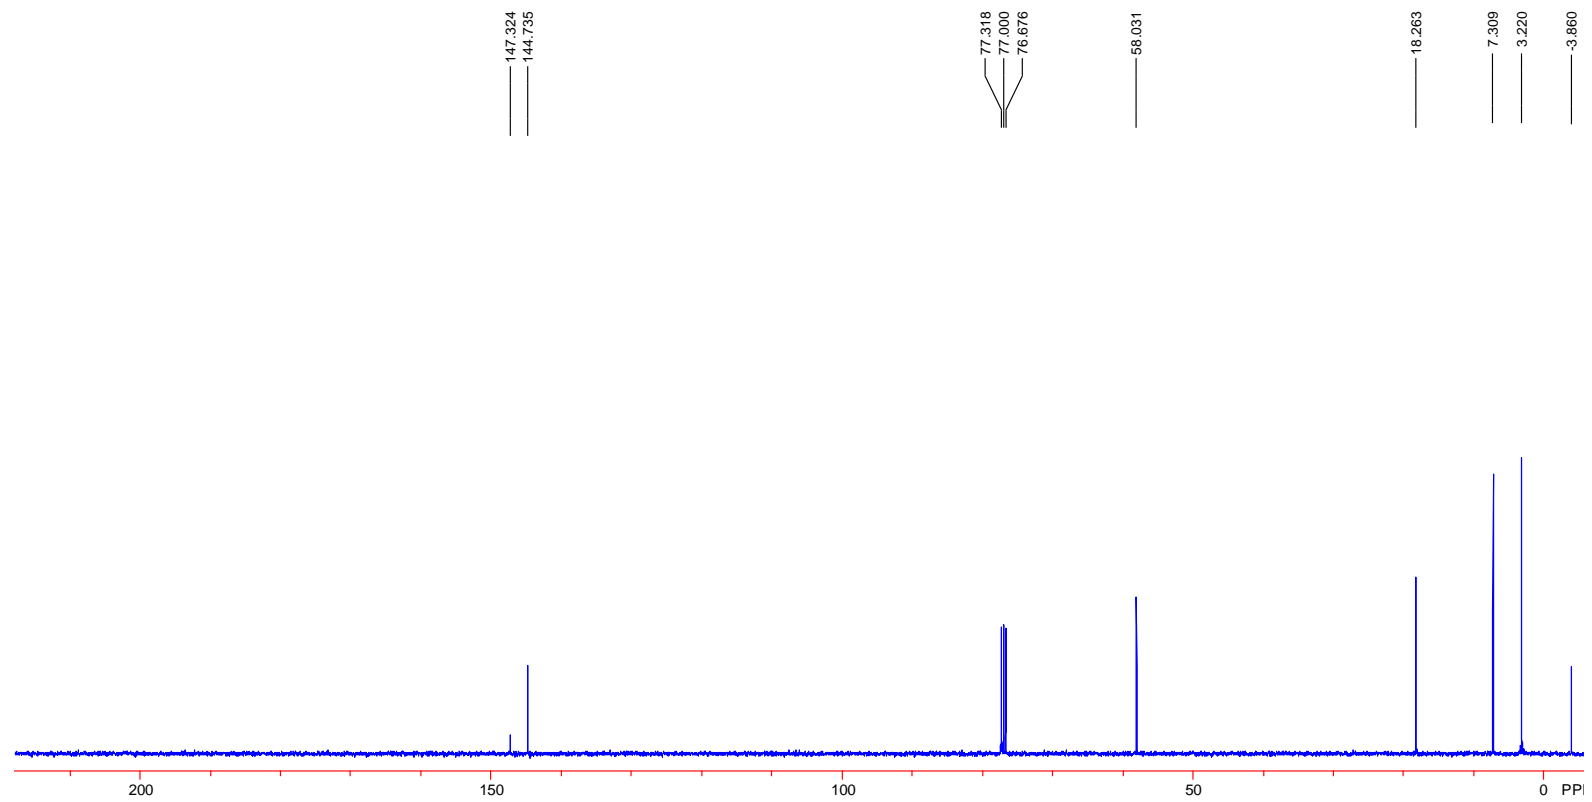

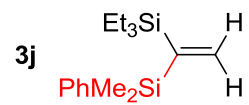

**<sup>1</sup>H NMR**

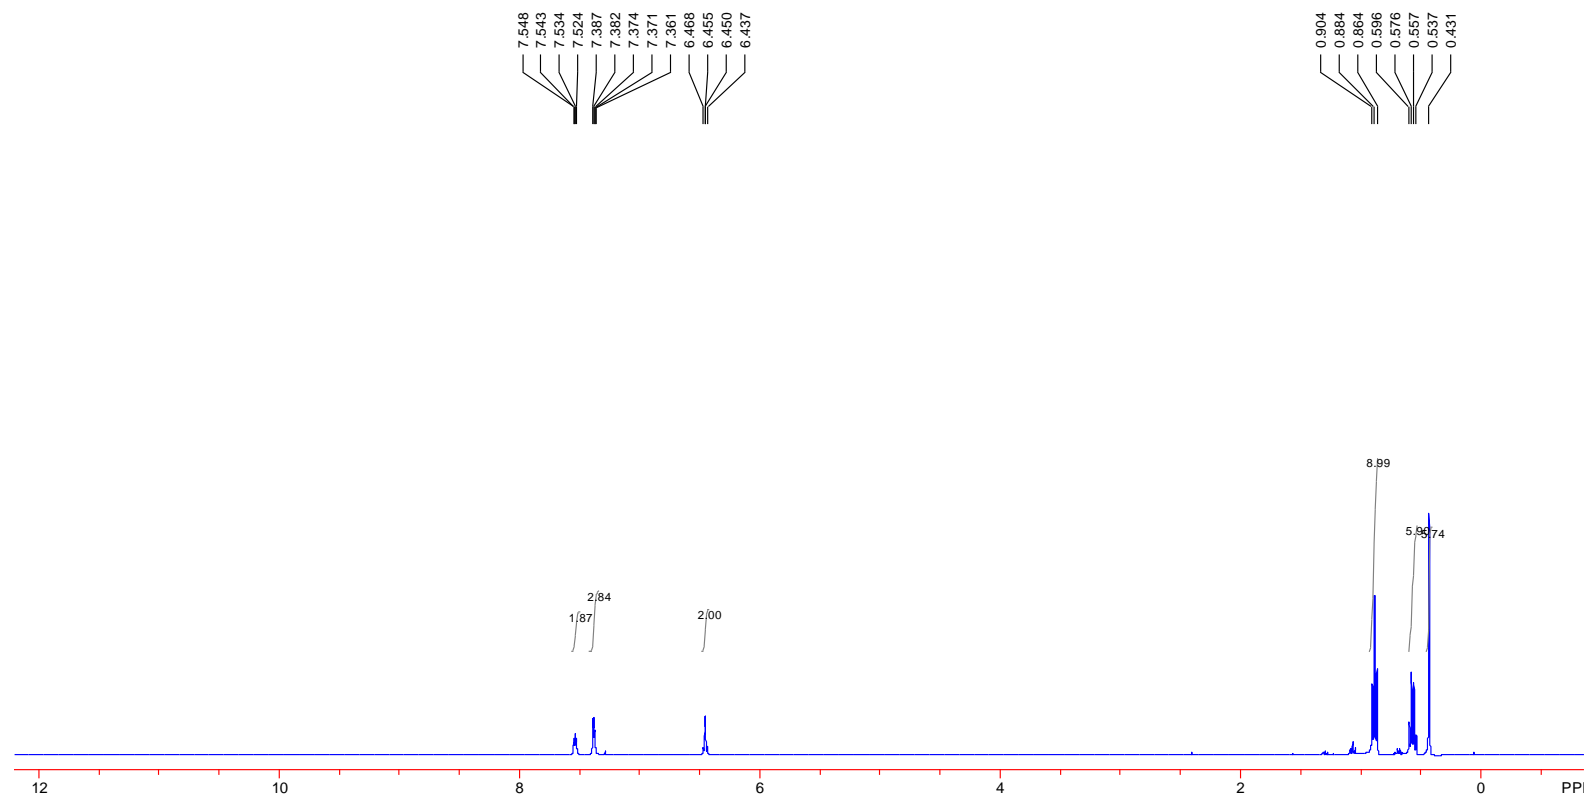

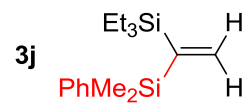

**<sup>13</sup>C NMR**

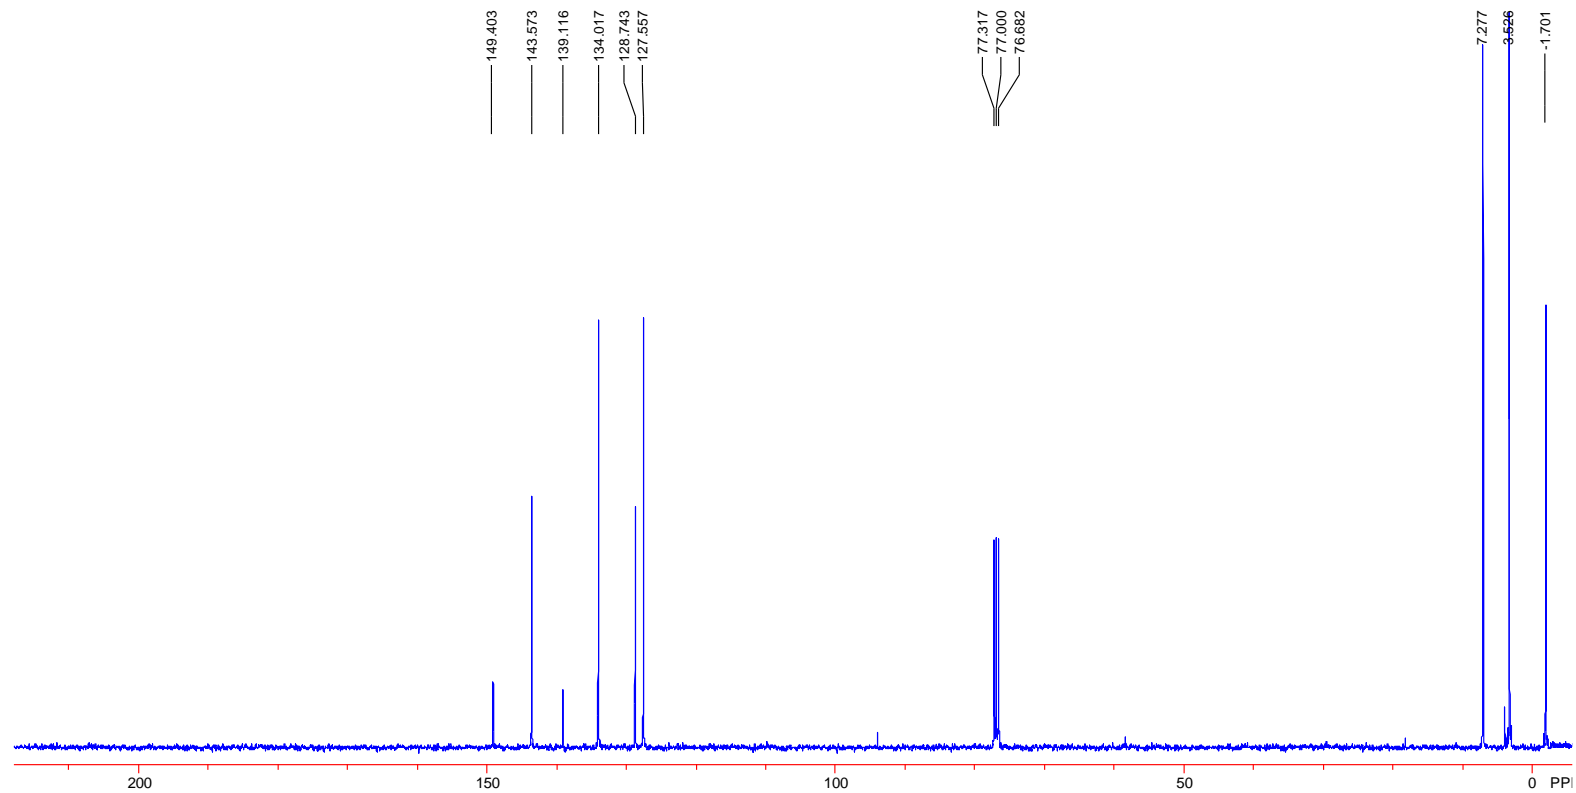

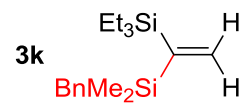

**<sup>1</sup>H NMR**

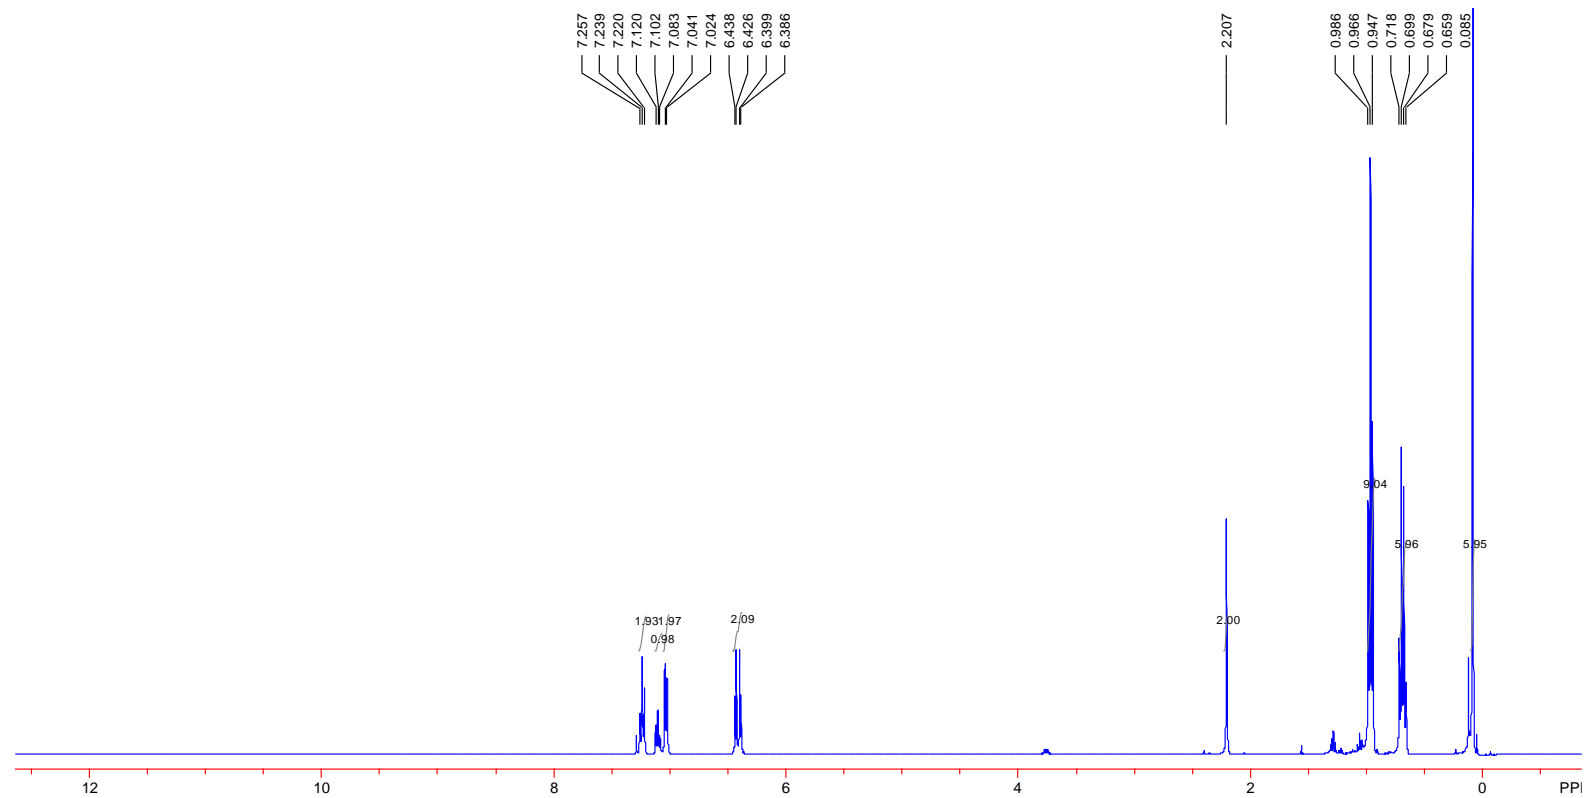



**<sup>13</sup>C NMR**

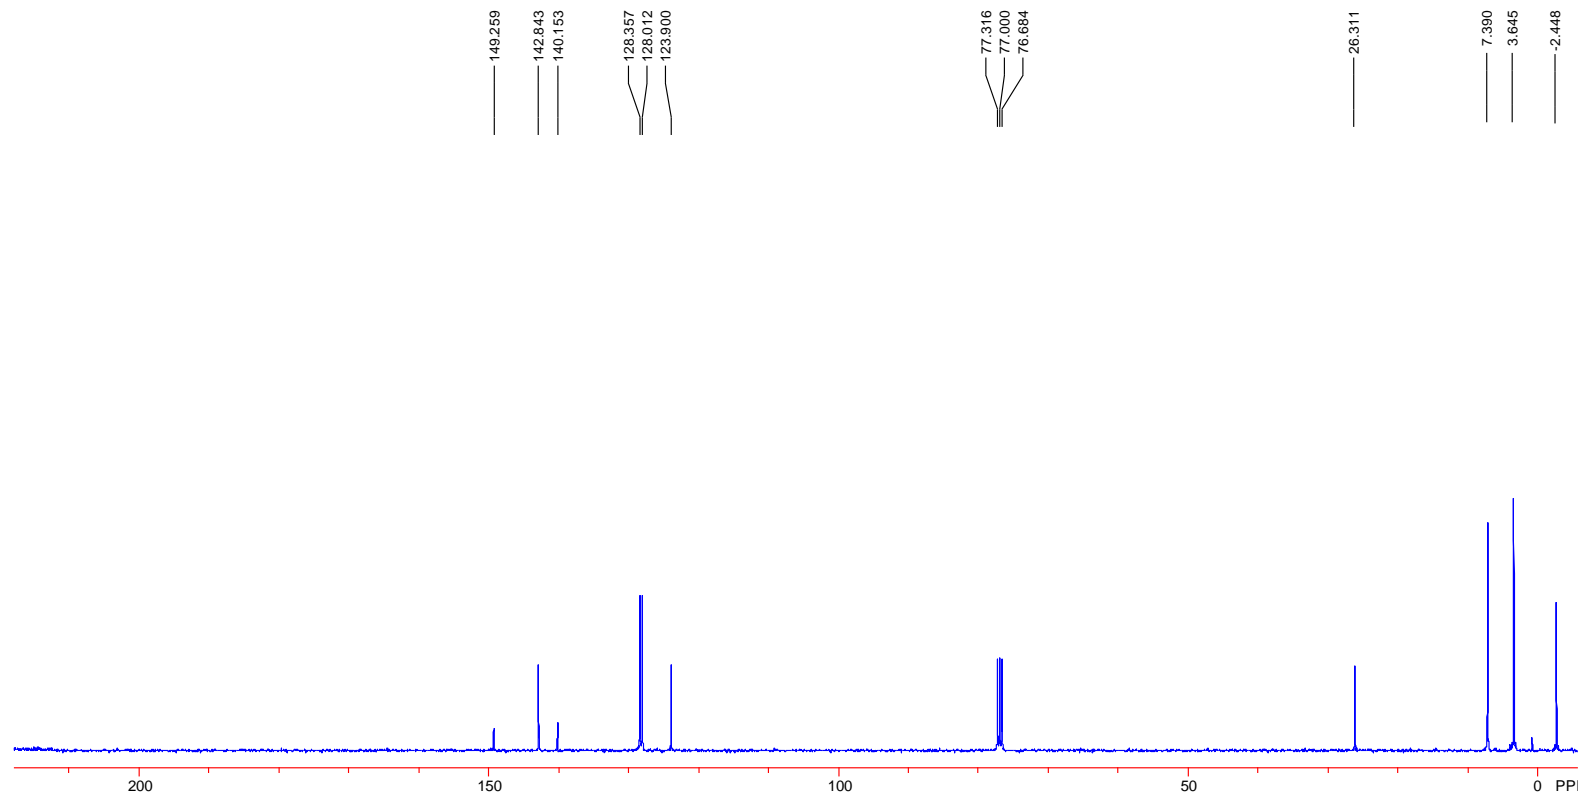



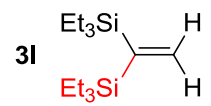

**<sup>1</sup>H NMR**

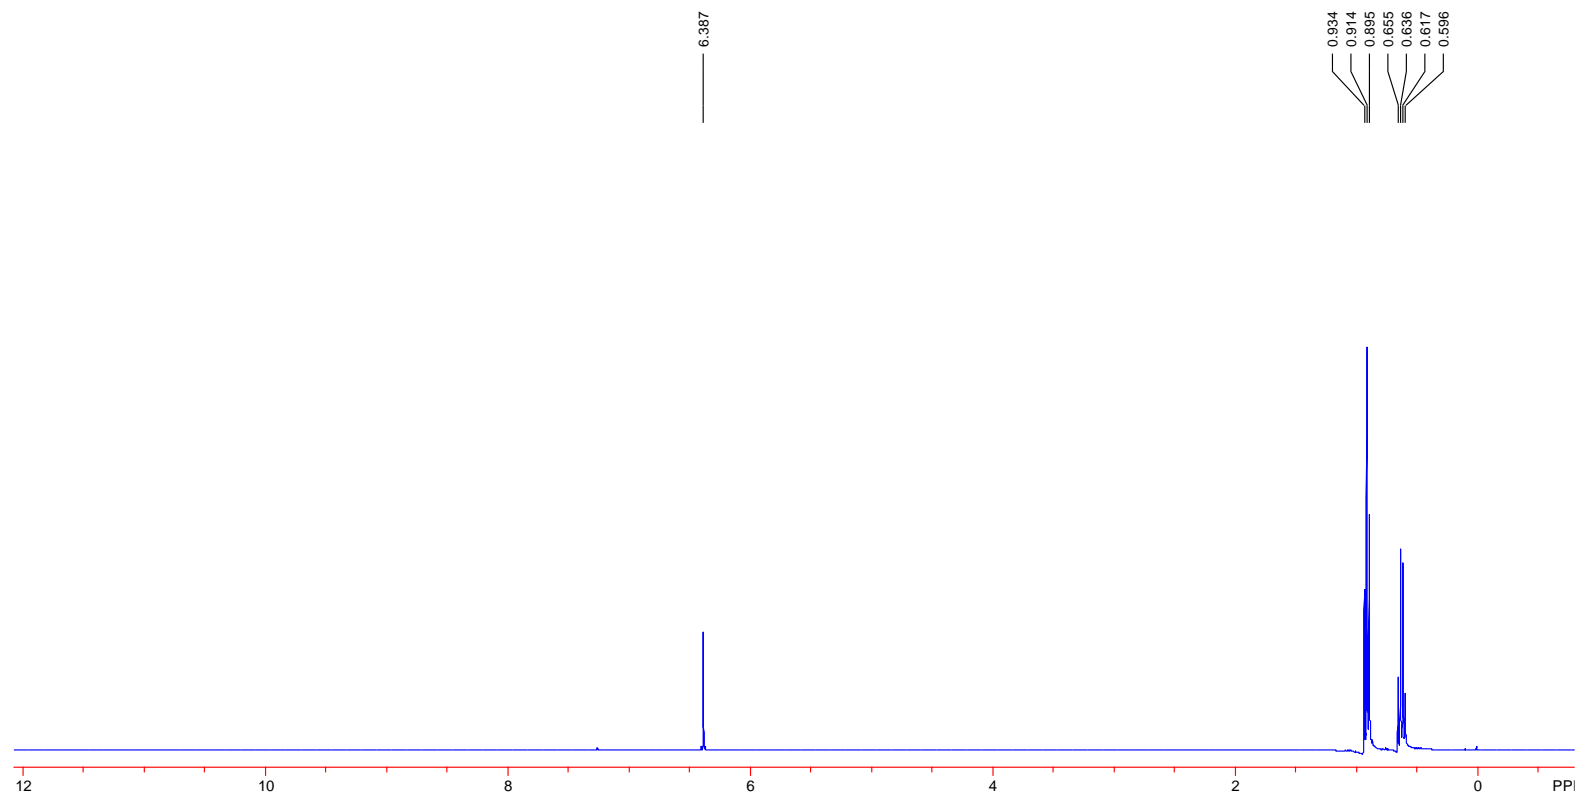



**<sup>13</sup>C NMR**

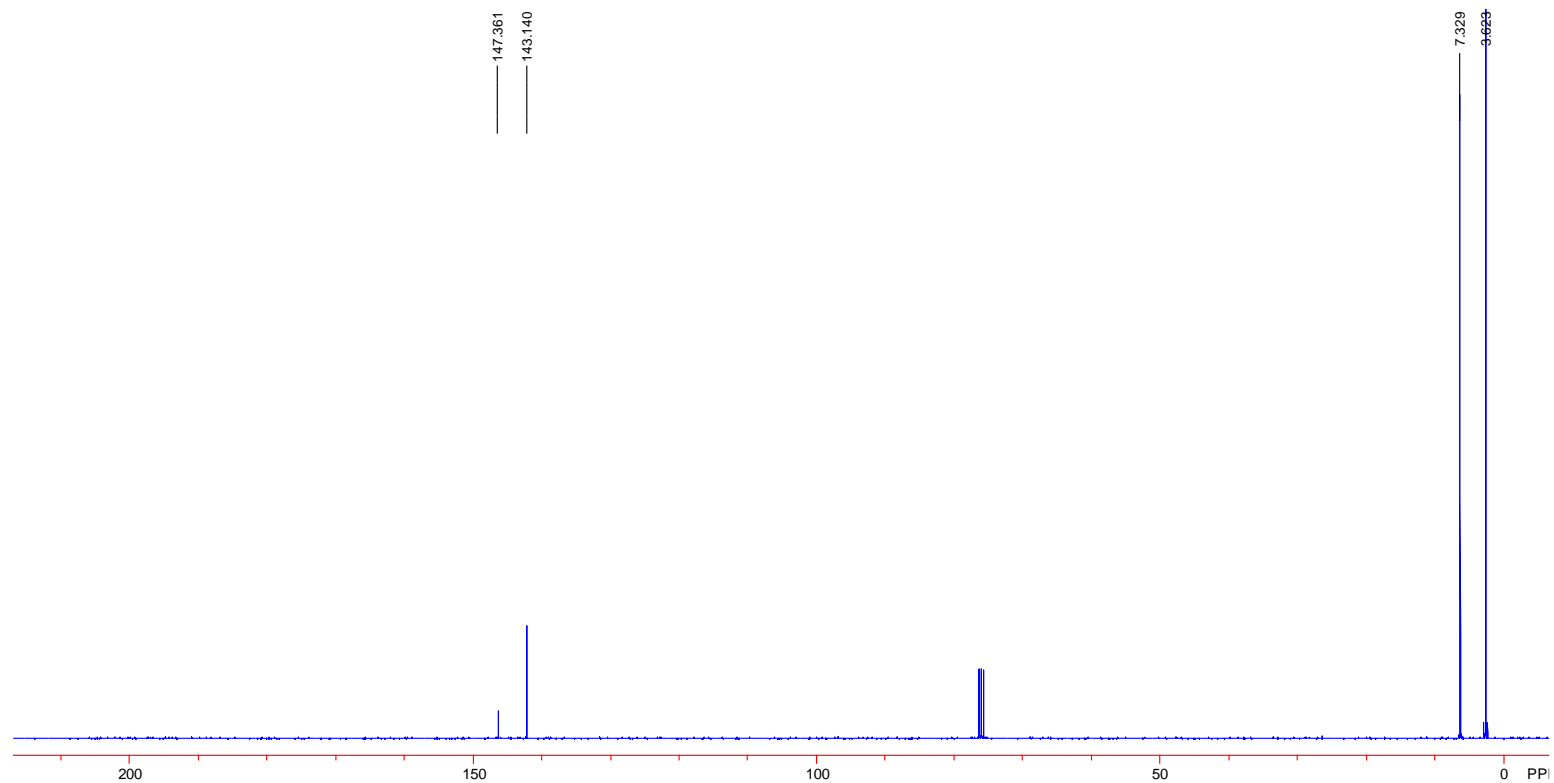

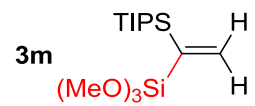

<sup>1</sup>H NMR

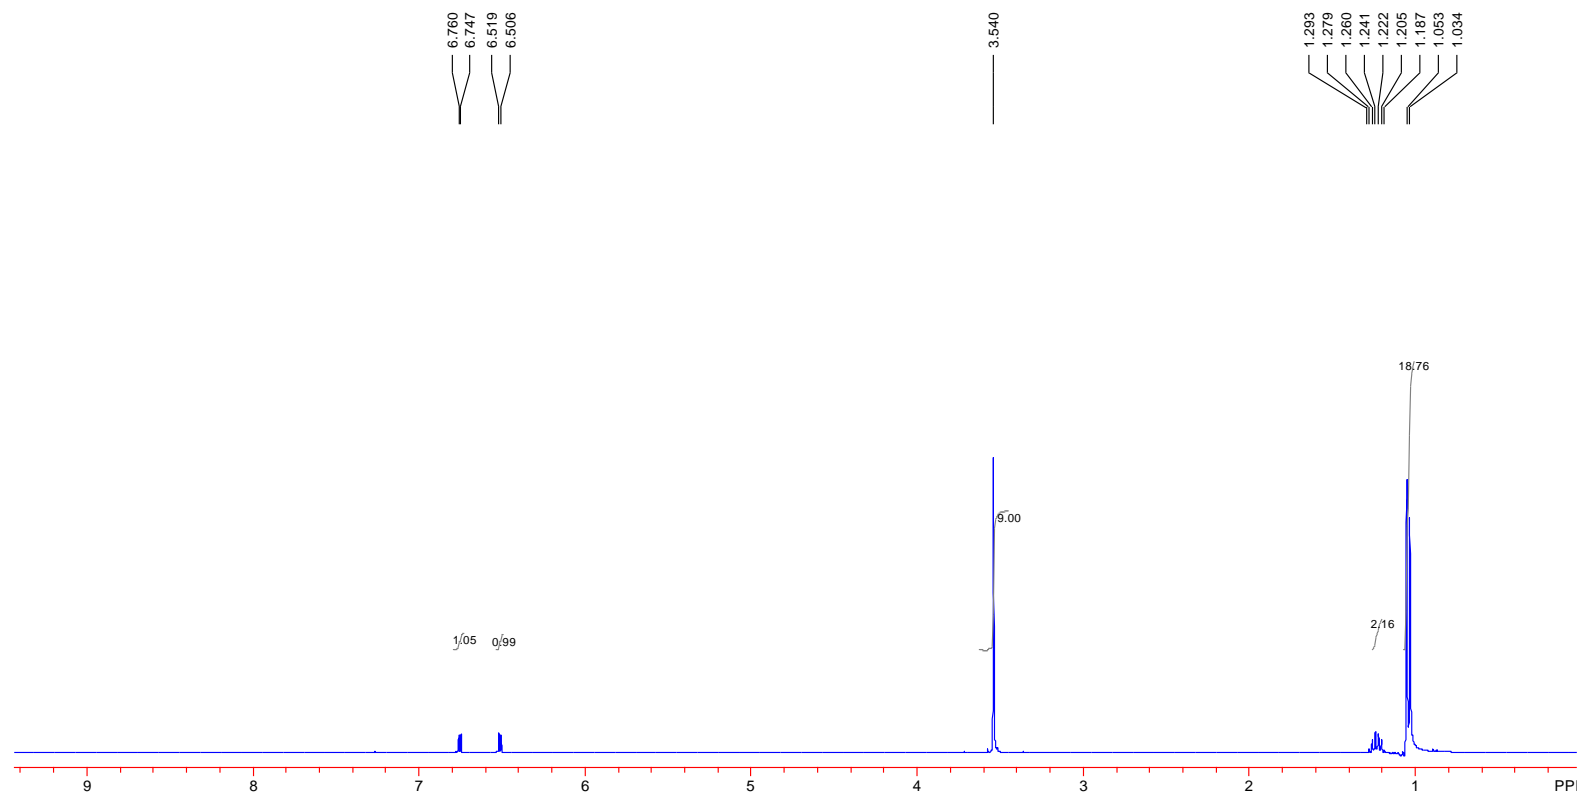

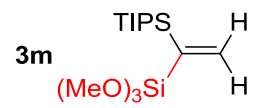

<sup>13</sup>C NMR

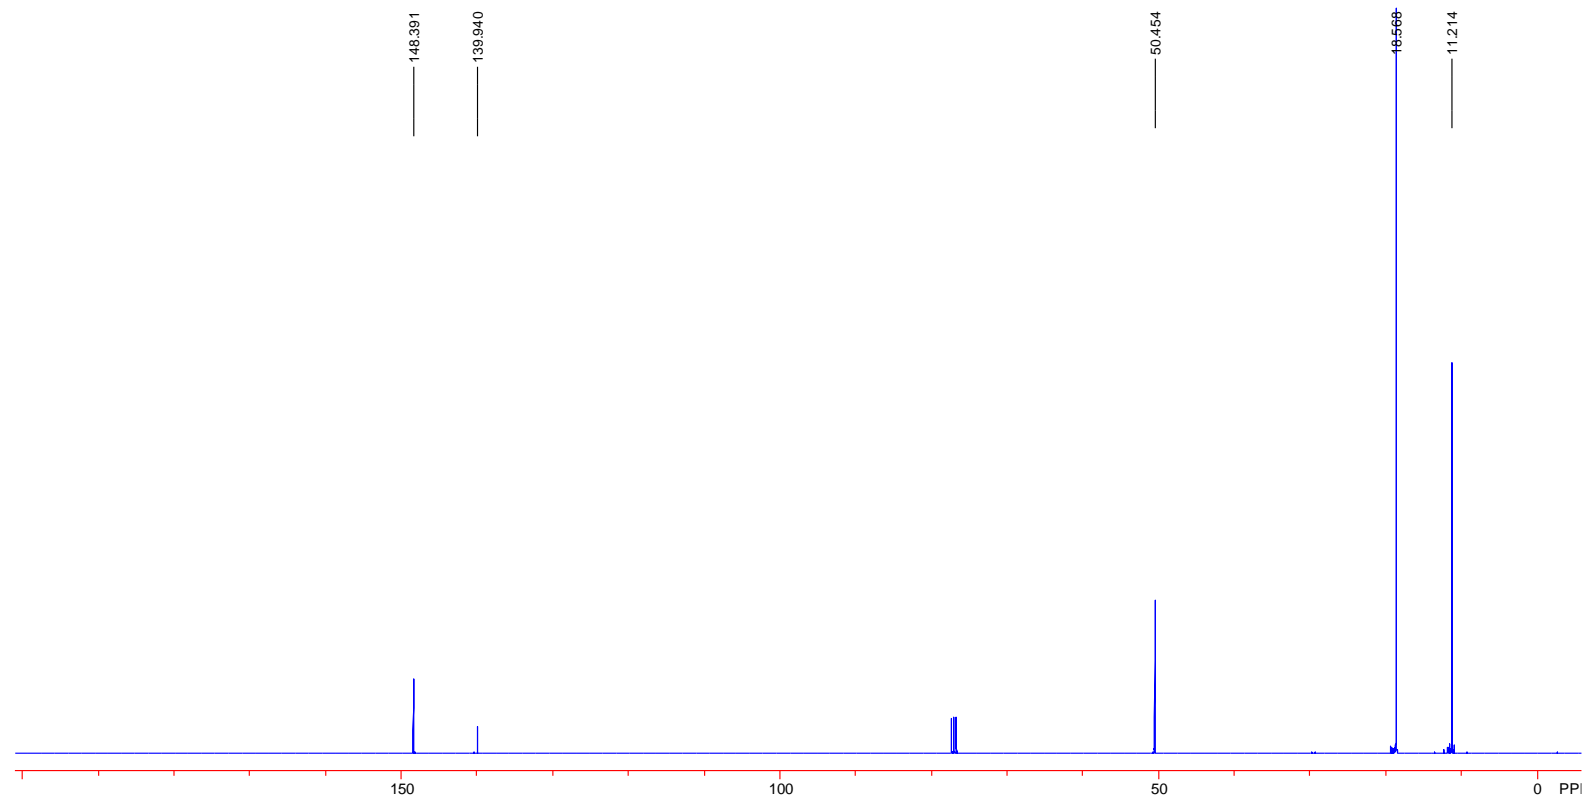

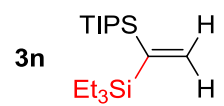

<sup>1</sup>H NMR

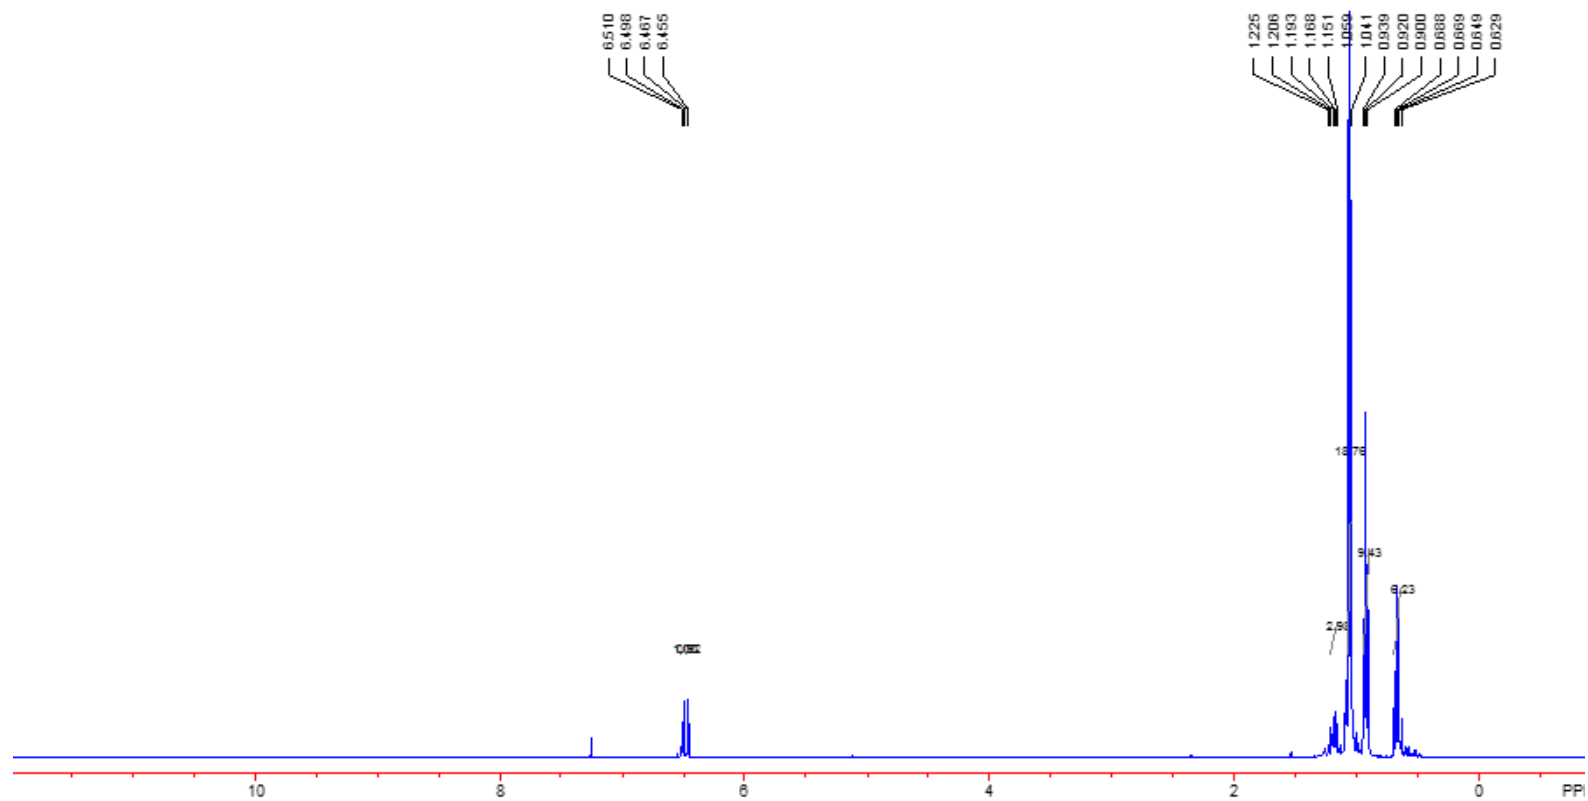

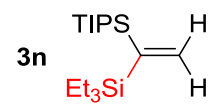

**<sup>13</sup>C NMR**

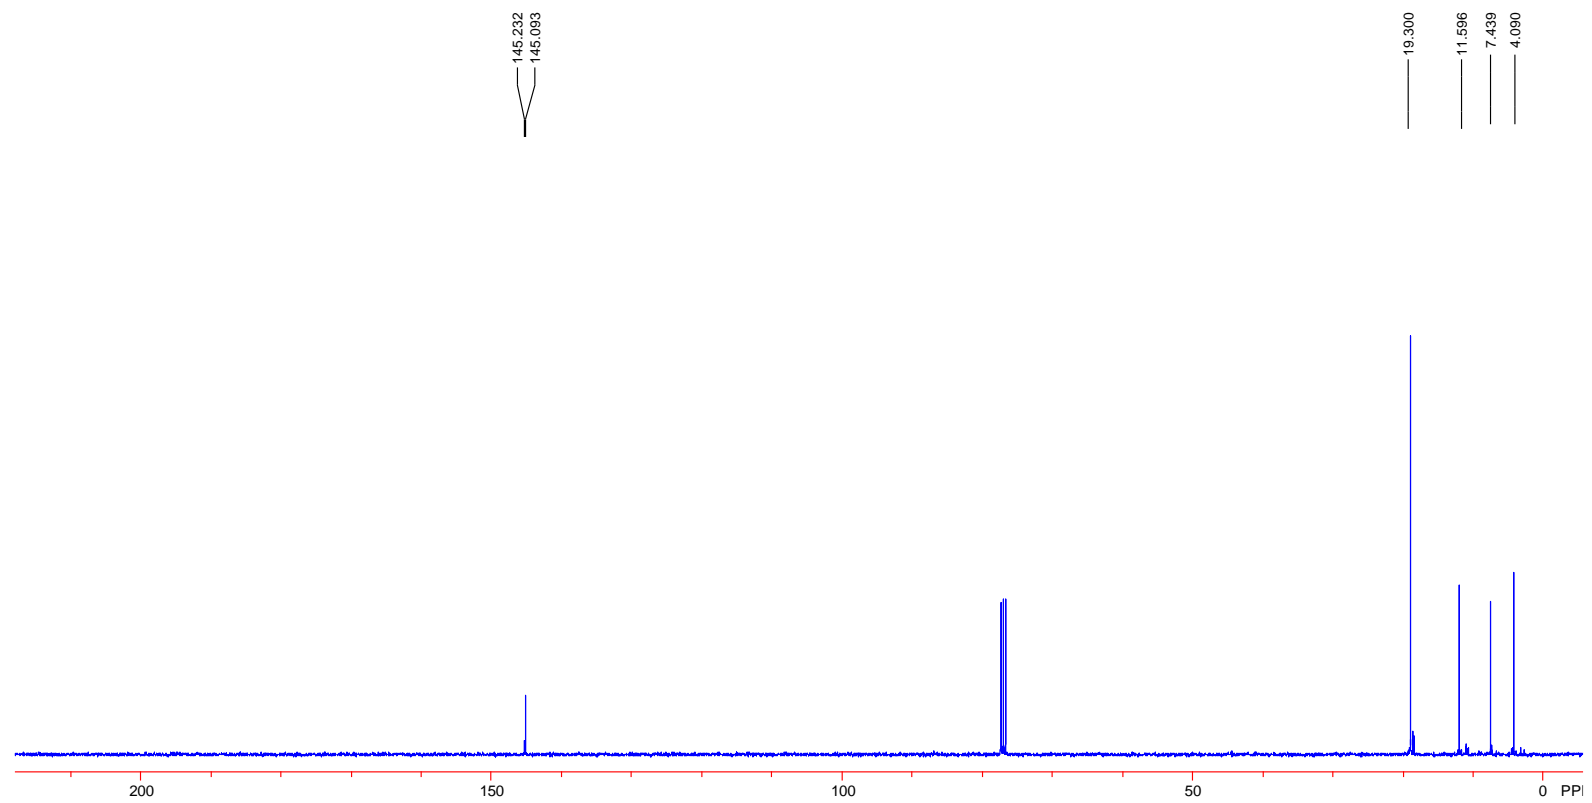

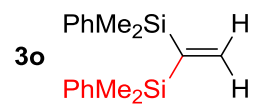

**<sup>1</sup>H NMR**

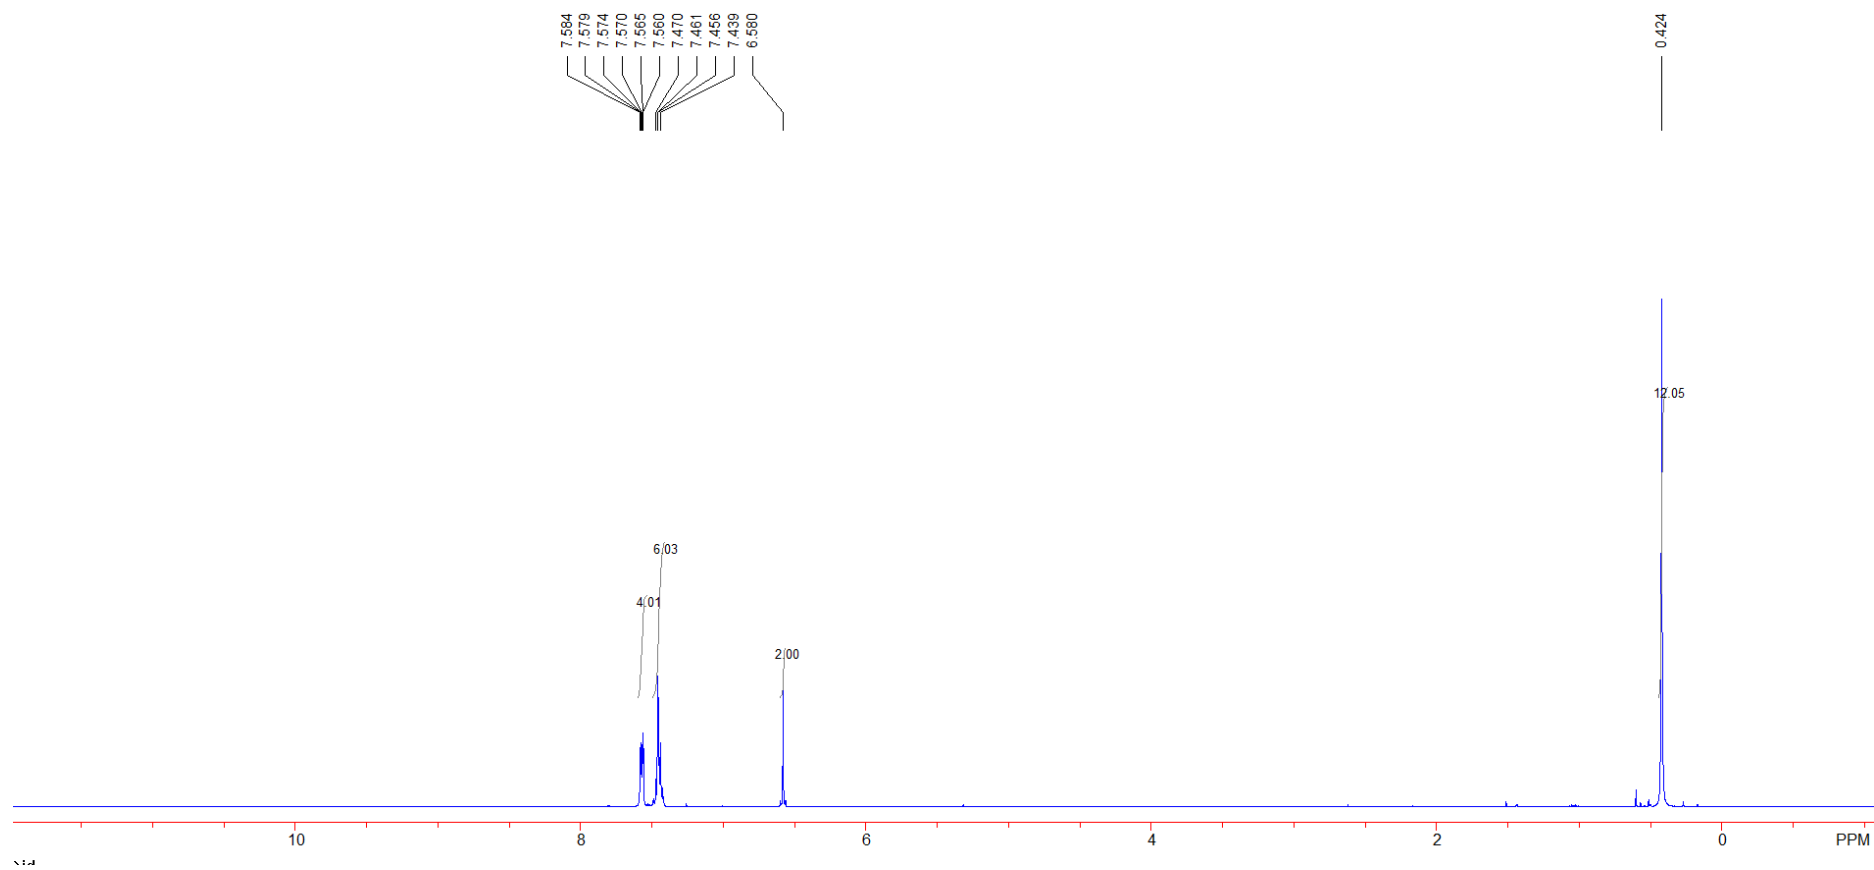



**<sup>13</sup>C NMR**

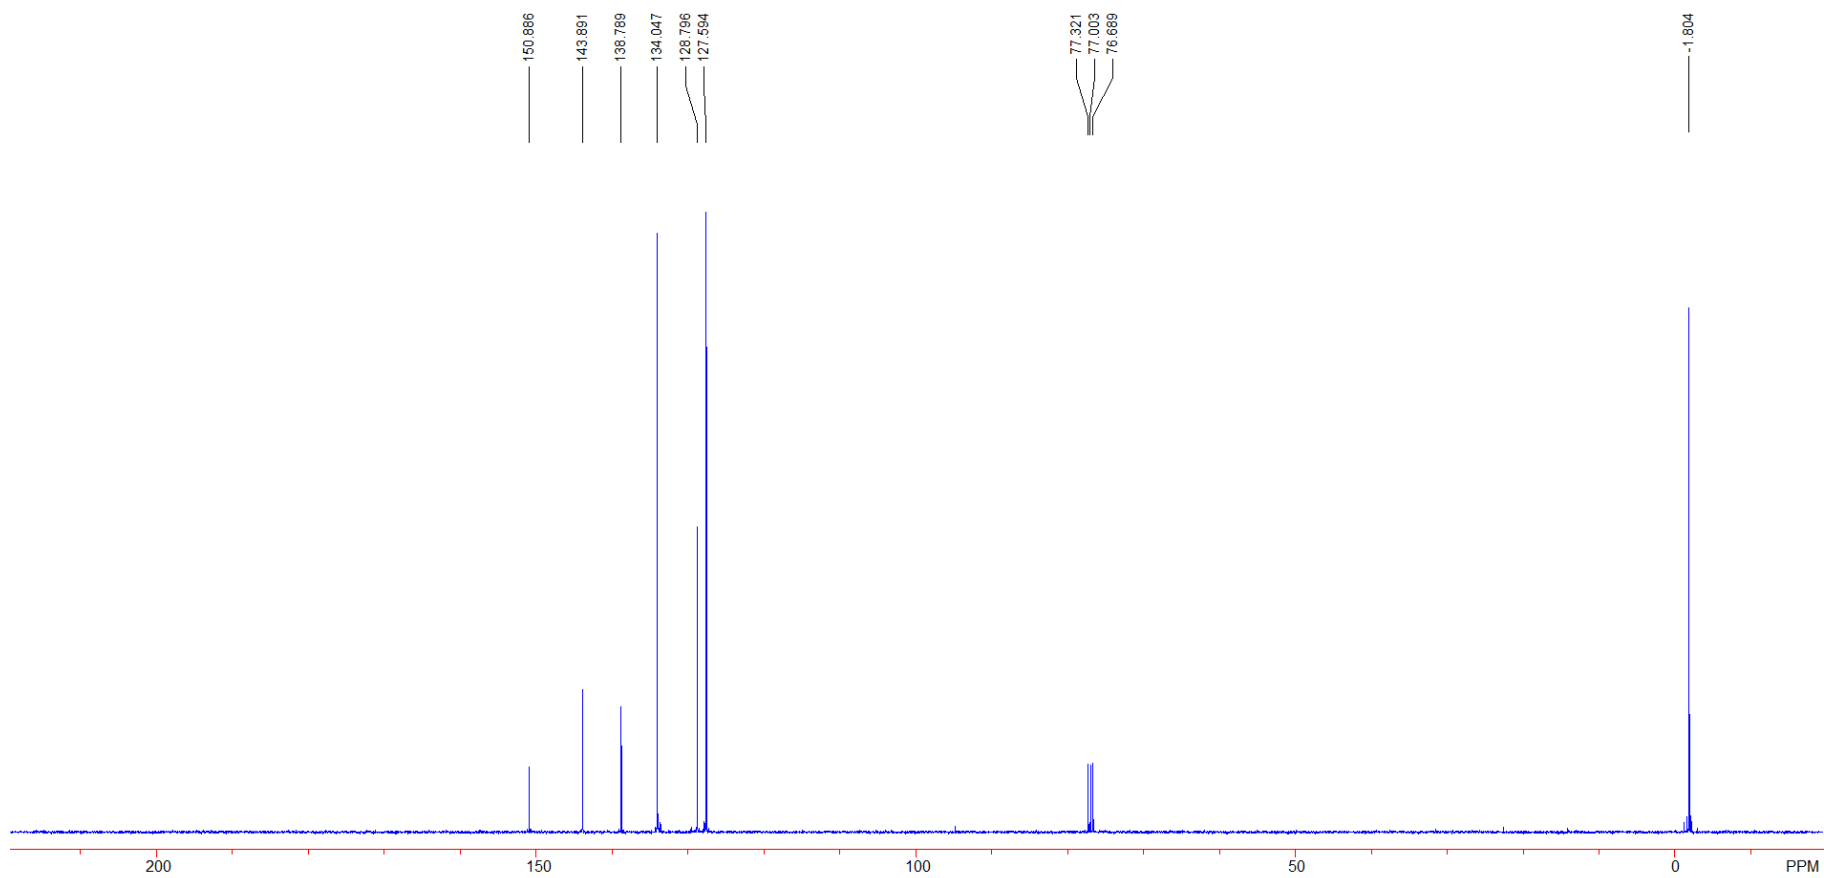





**DEPT135**

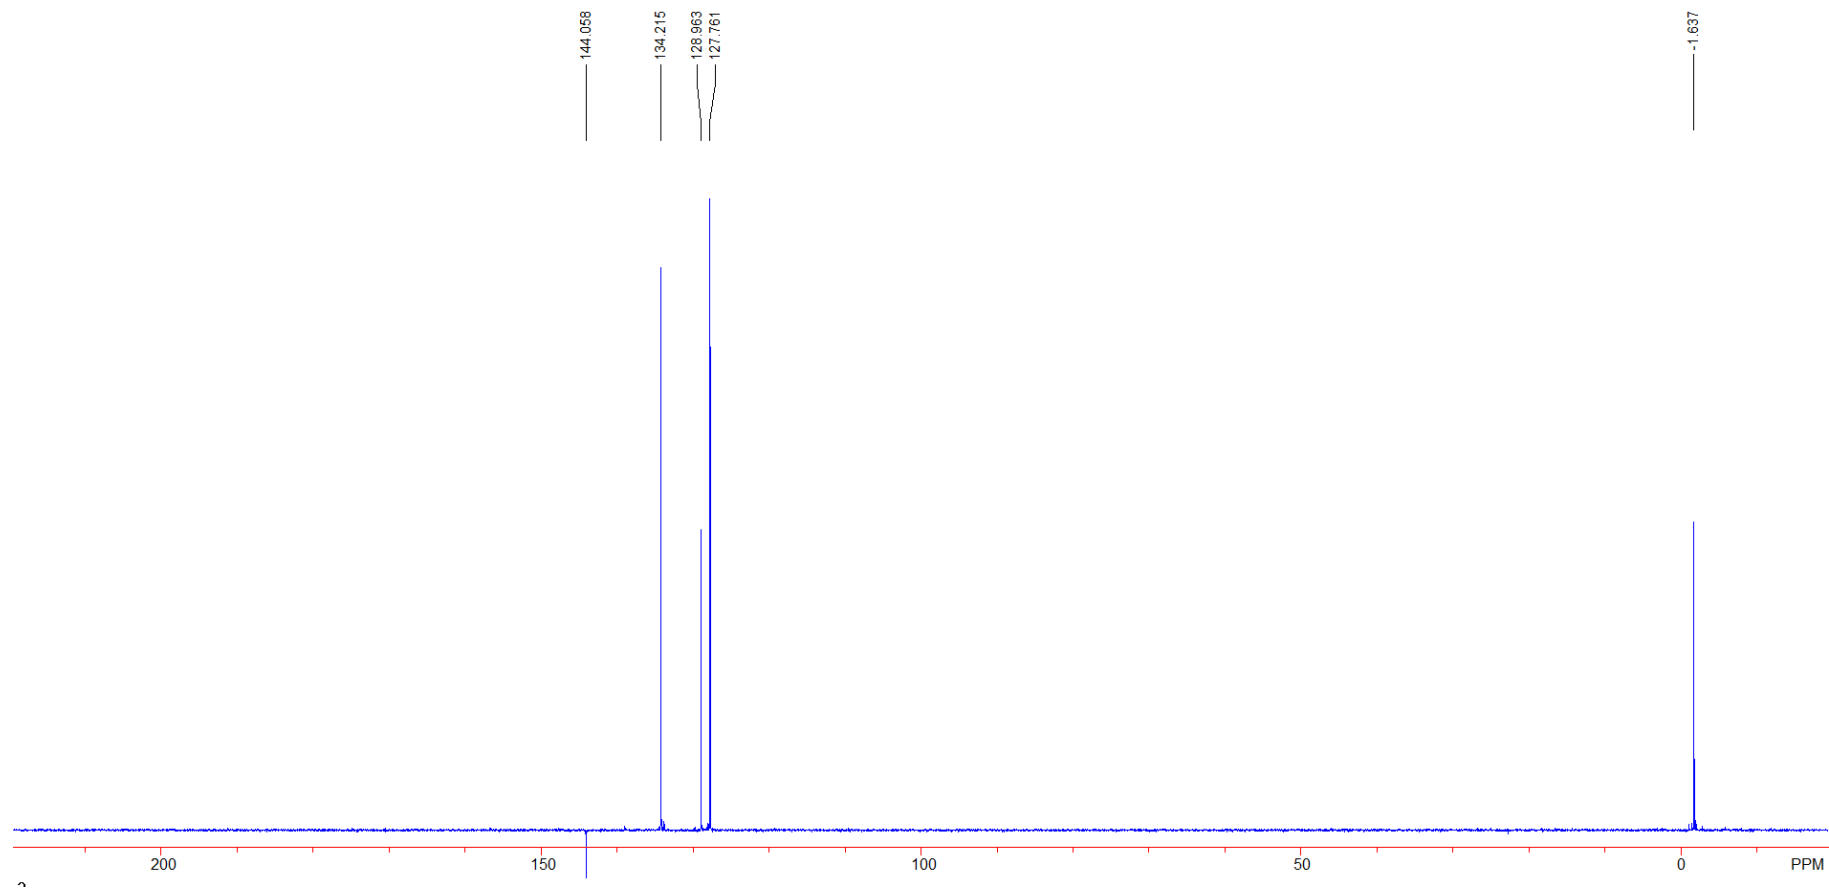

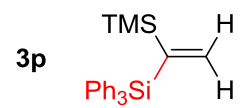

**<sup>1</sup>H NMR**

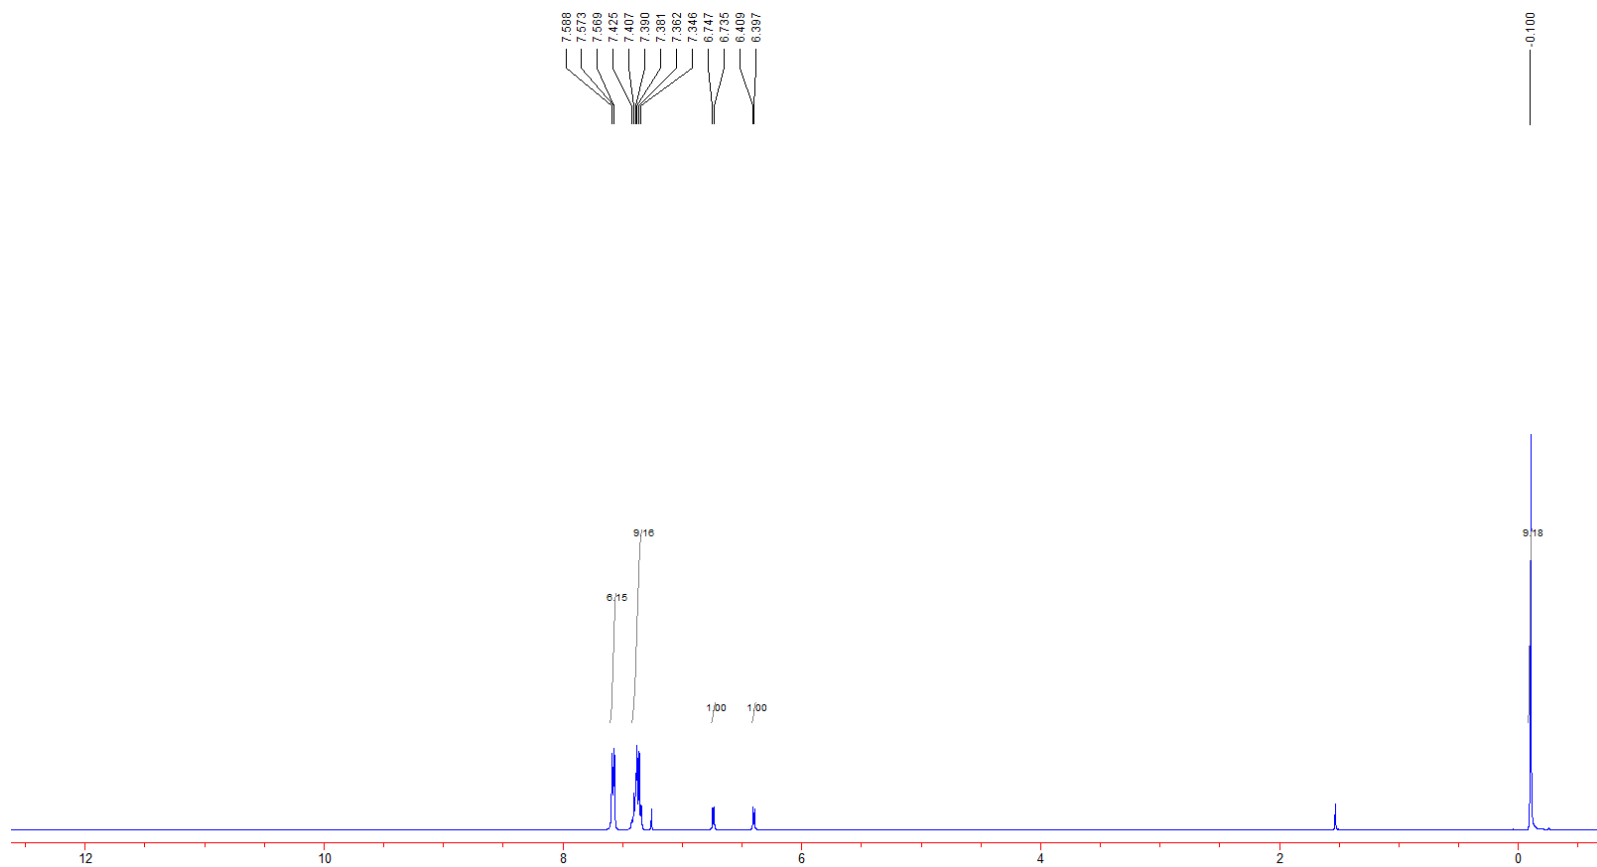

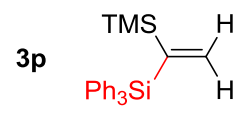

<sup>13</sup>C NMR

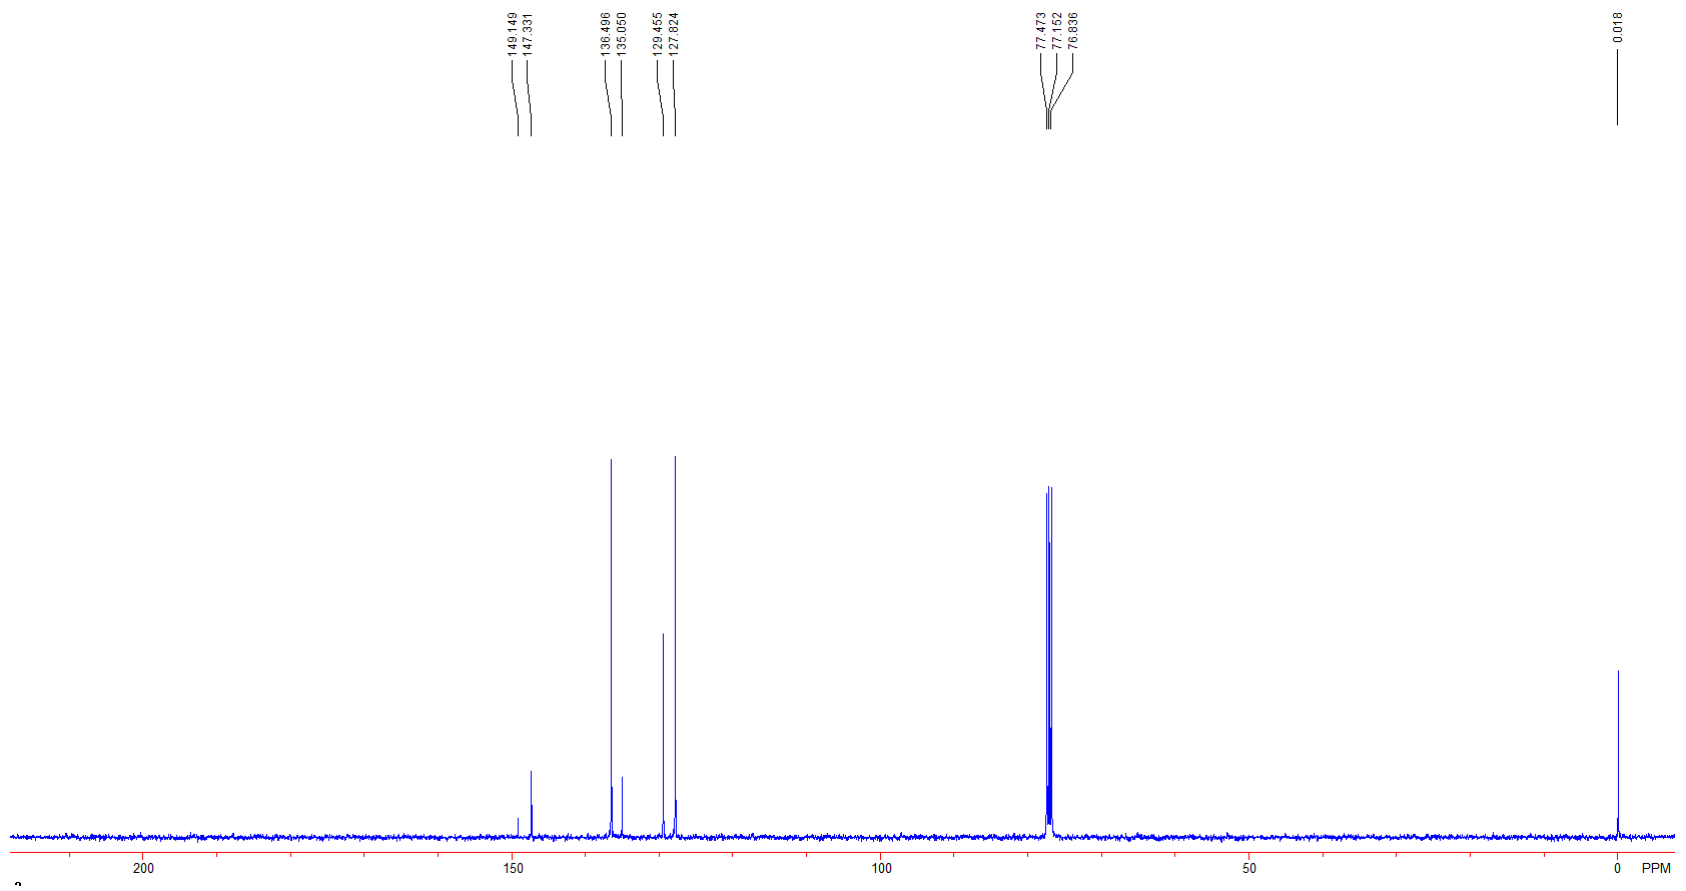

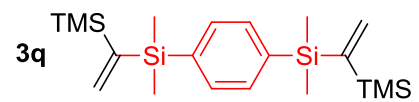

<sup>1</sup>H NMR

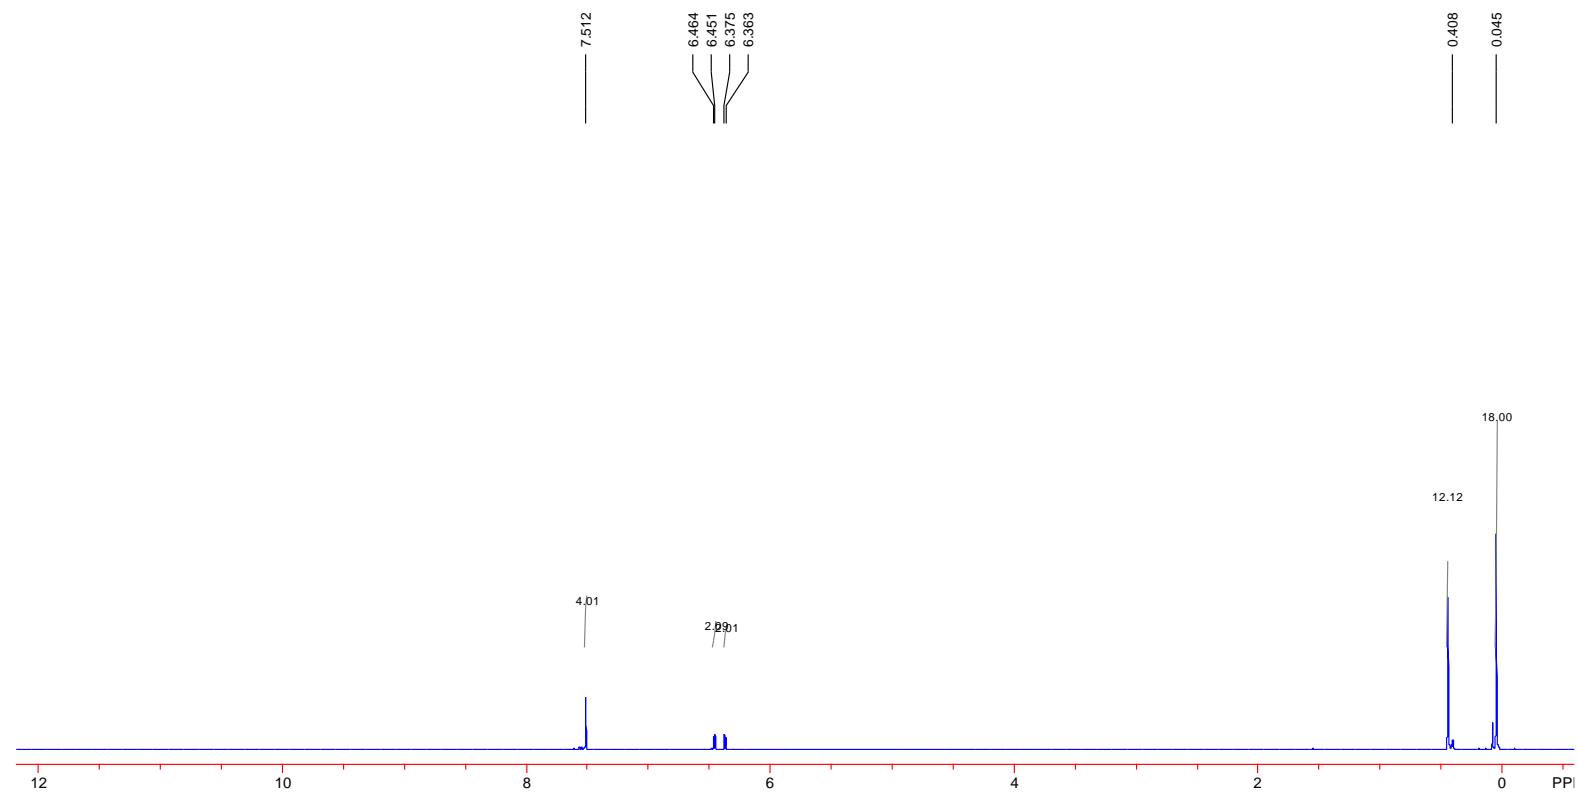

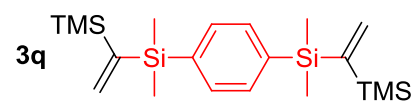

**<sup>13</sup>C NMR**

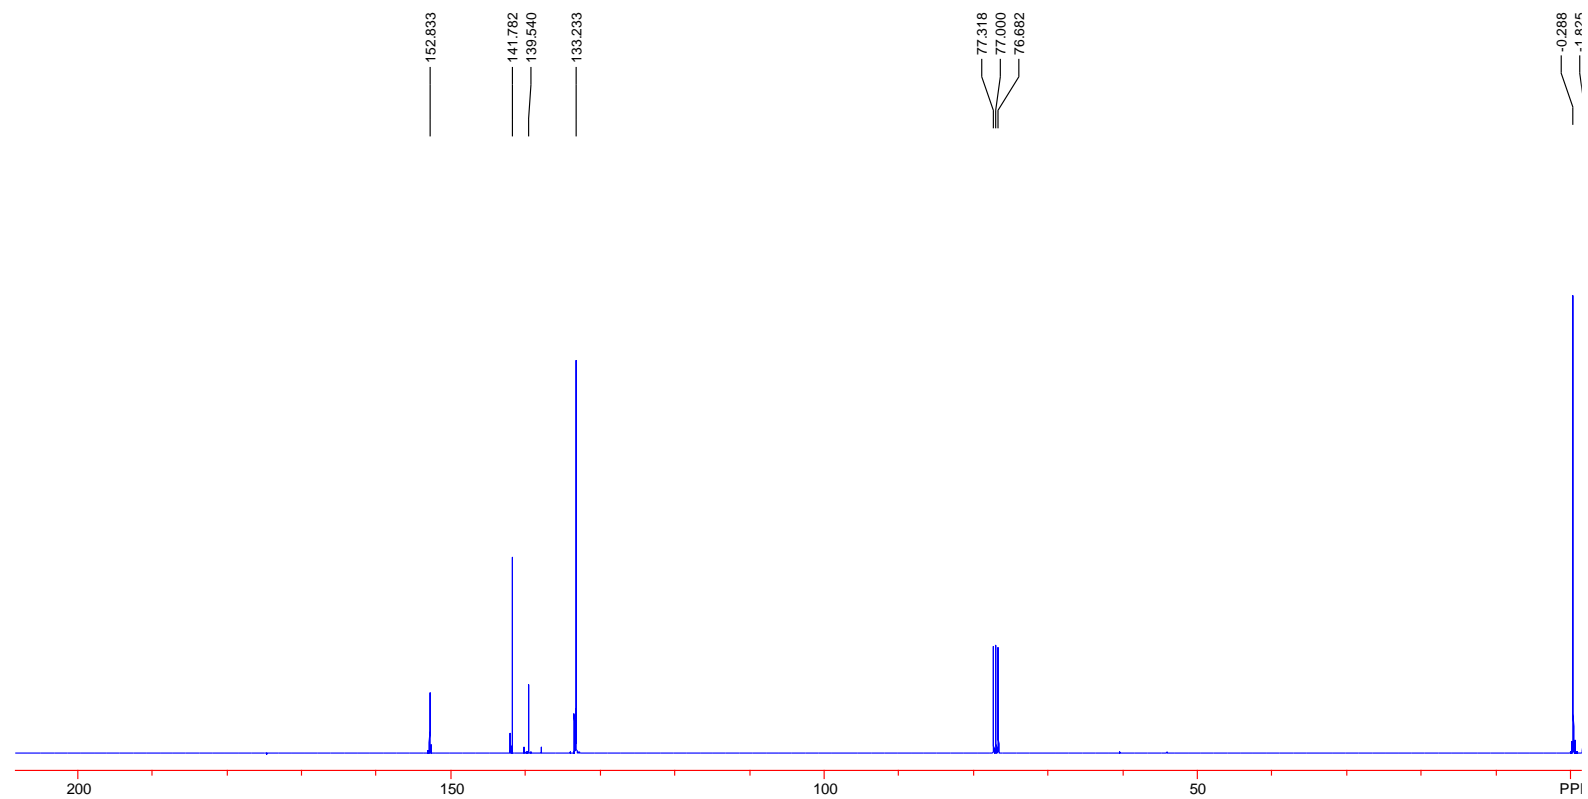

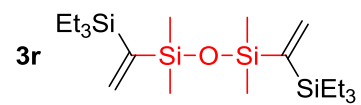

**<sup>1</sup>H NMR**

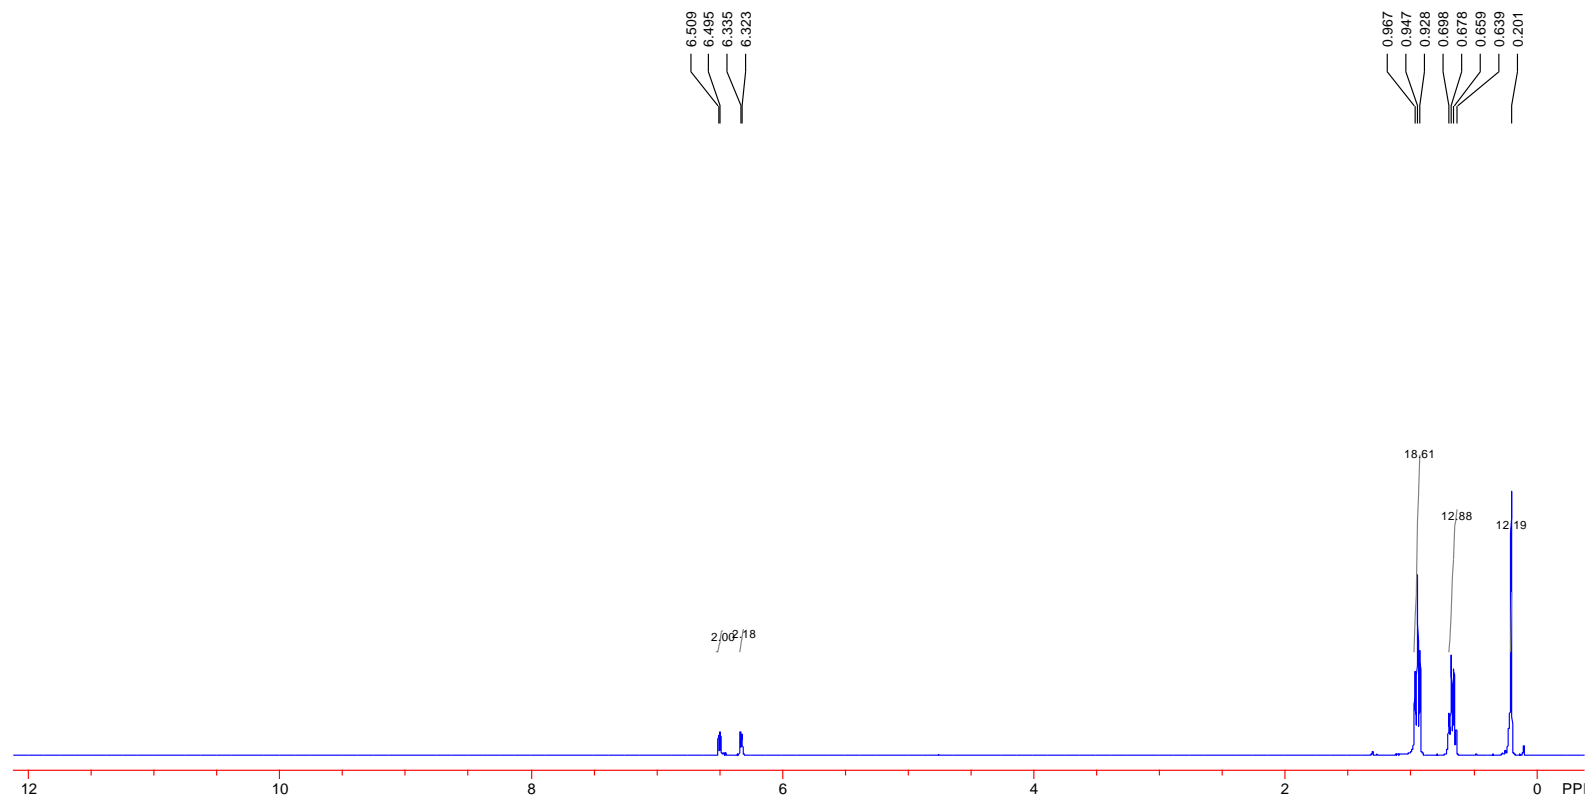

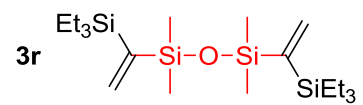

**<sup>13</sup>C NMR**

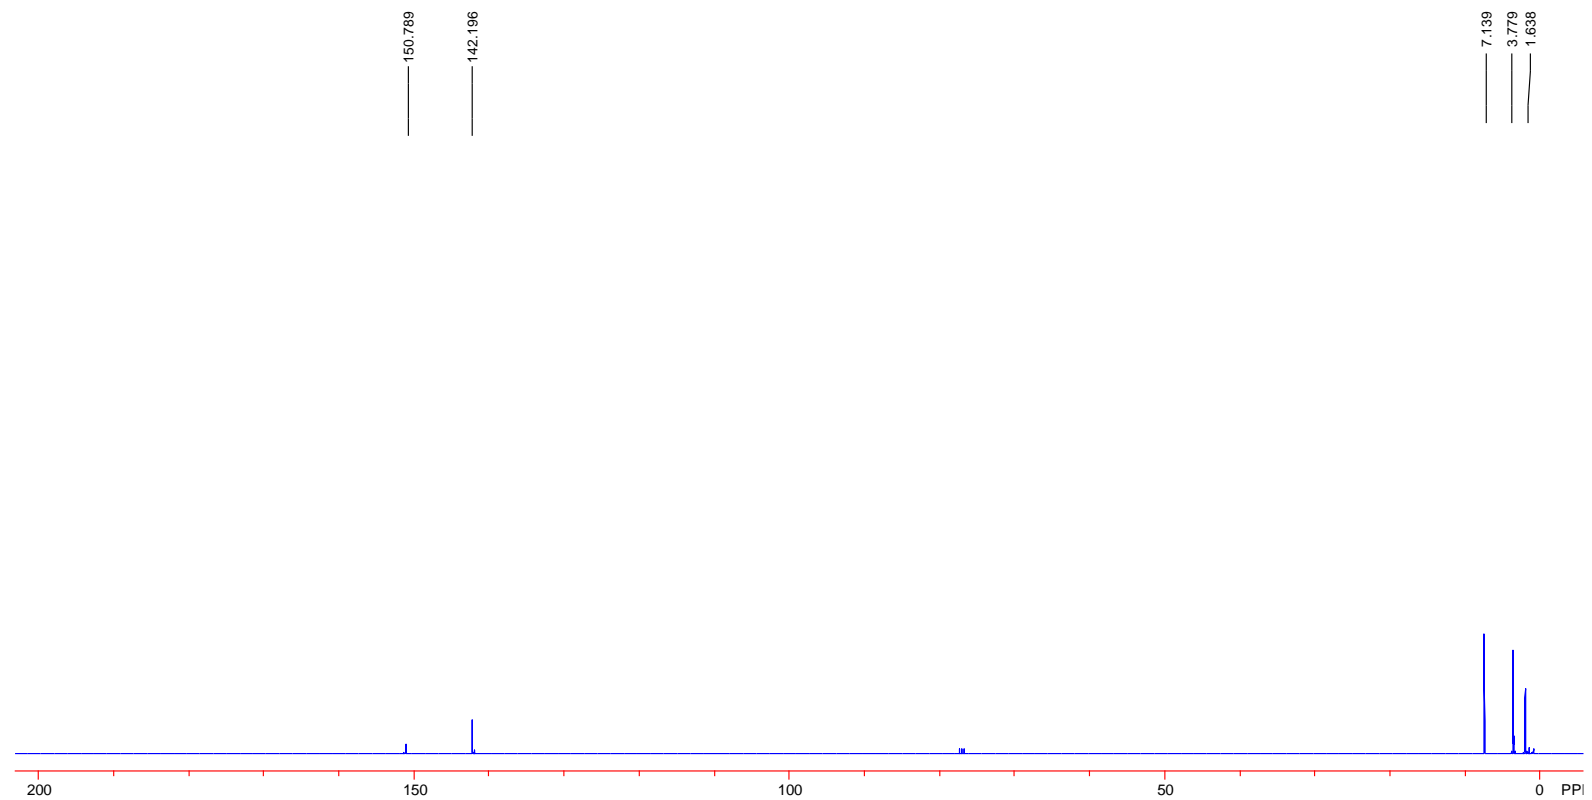

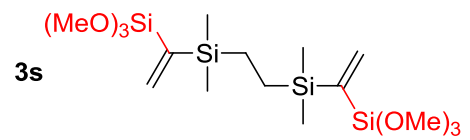

**<sup>1</sup>H NMR**

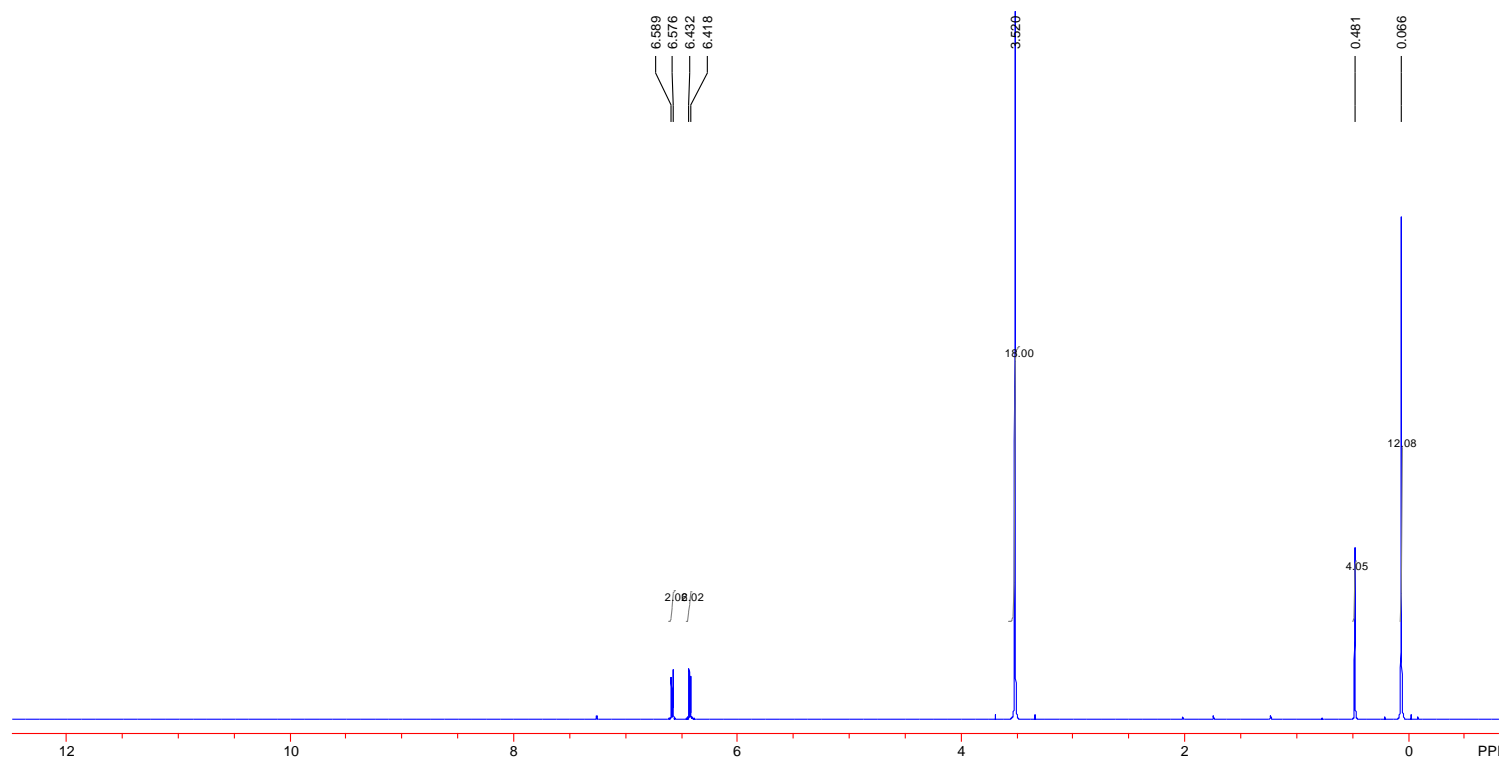





<sup>13</sup>C NMR

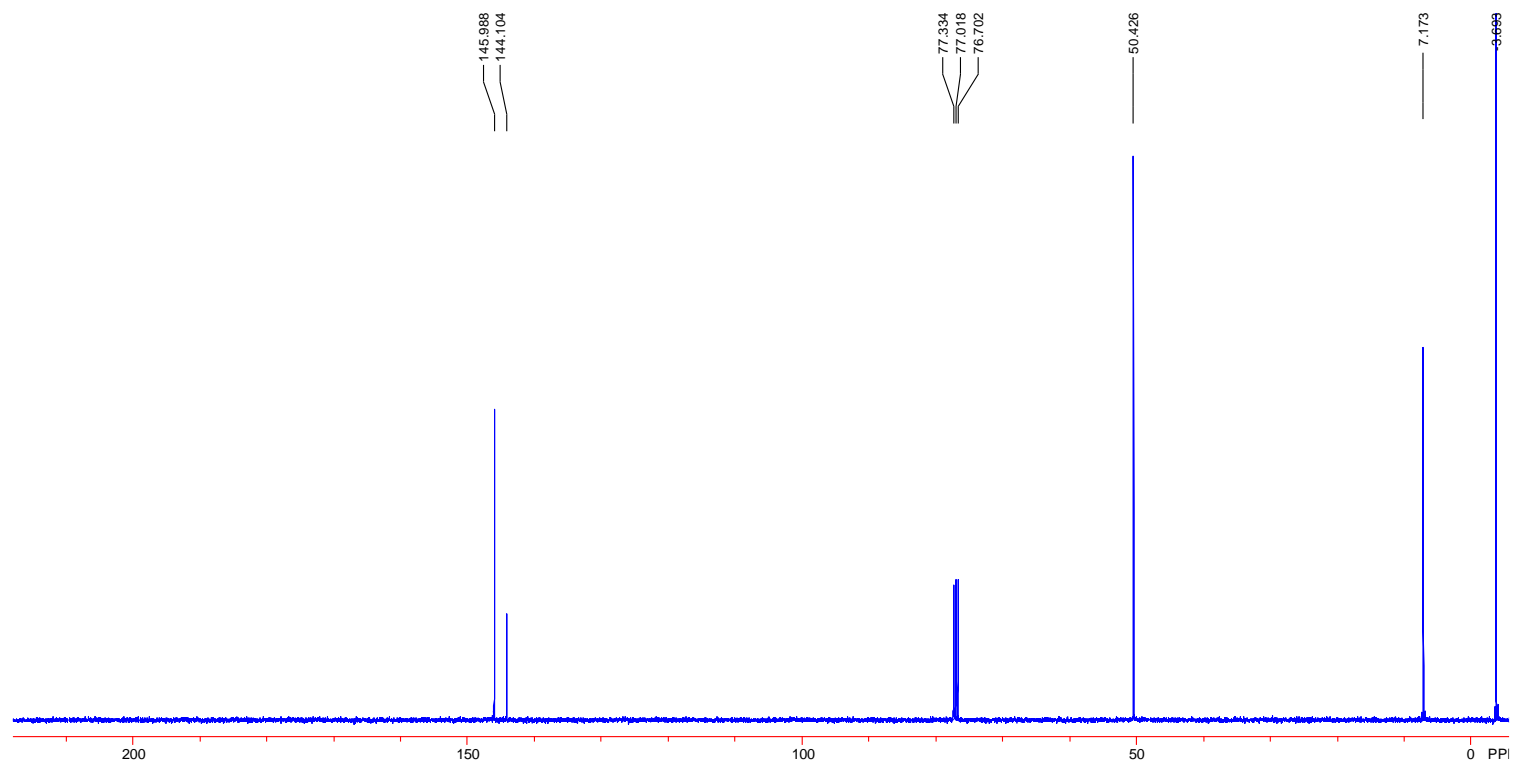

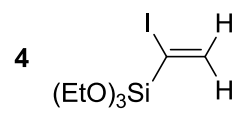

<sup>1</sup>H NMR

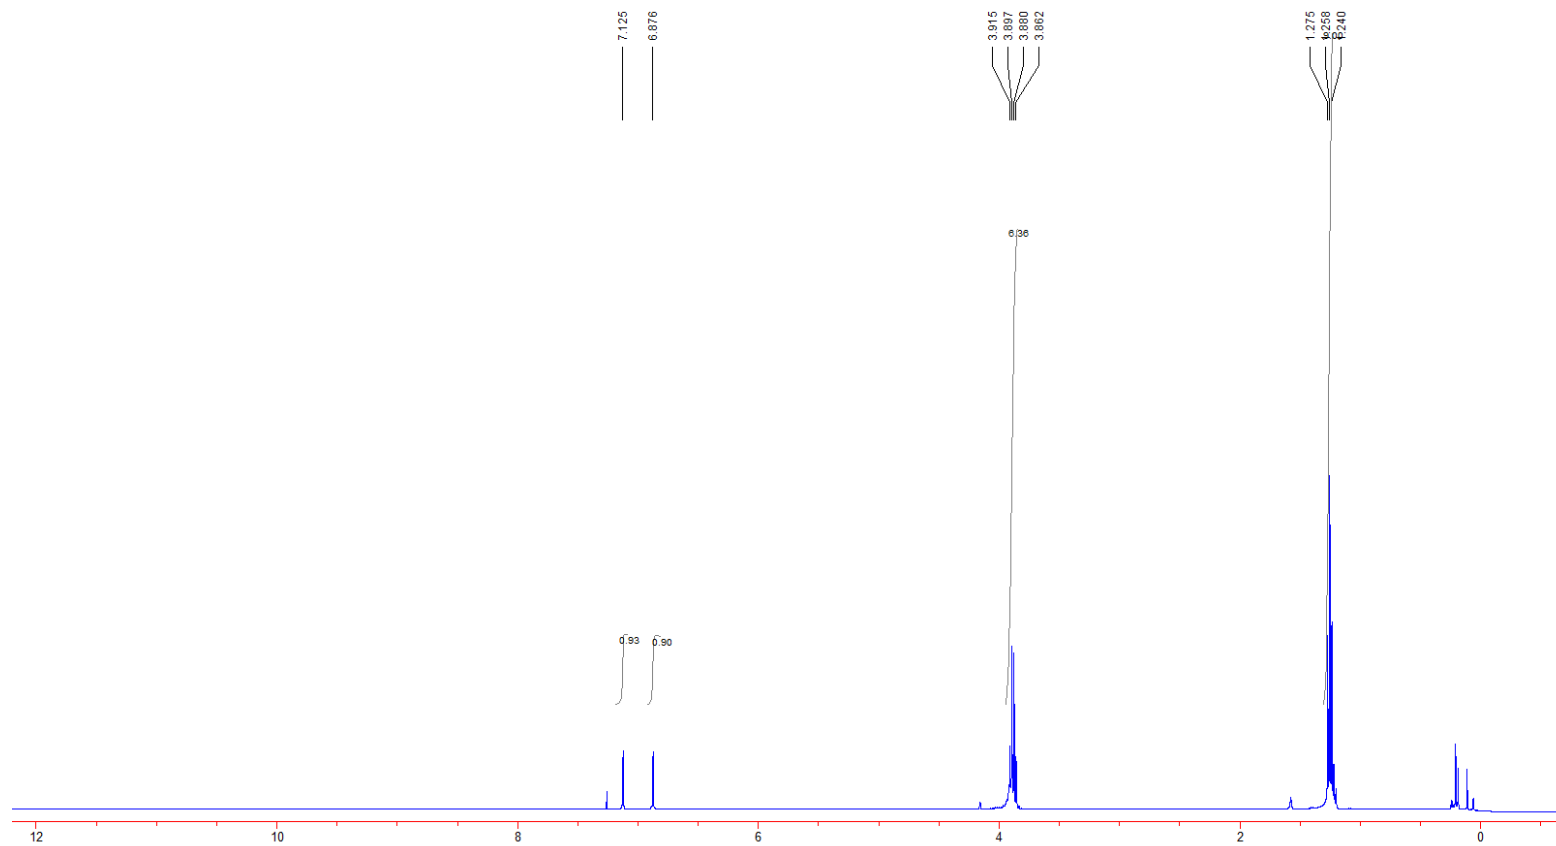

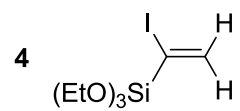

<sup>13</sup>C NMR

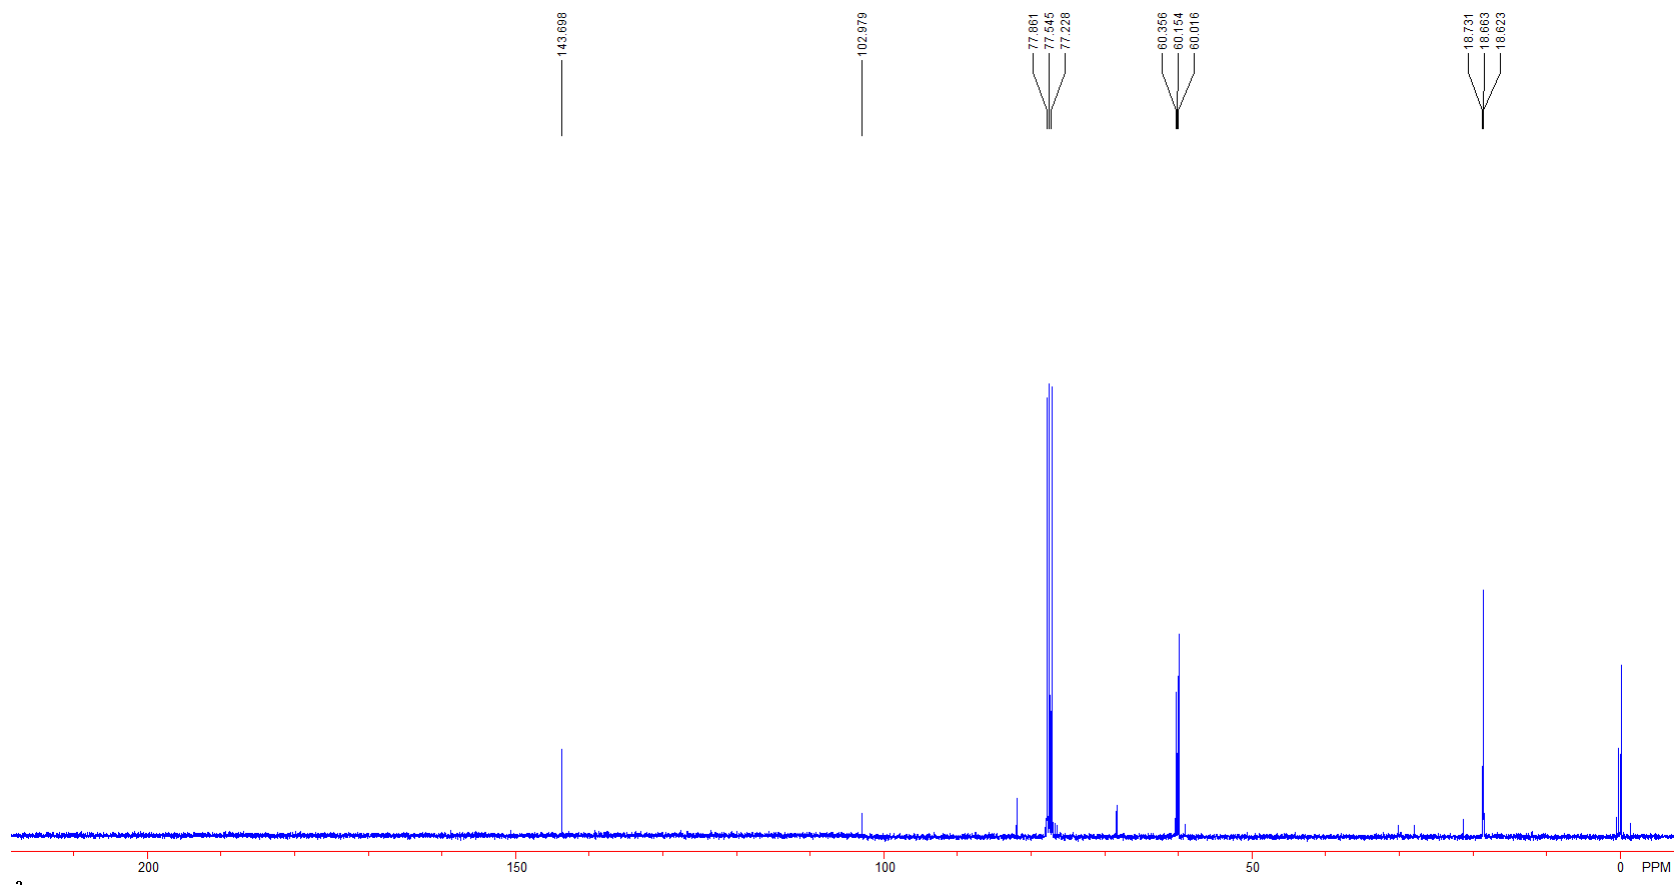

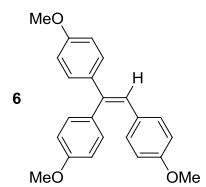

**<sup>1</sup>H NMR**

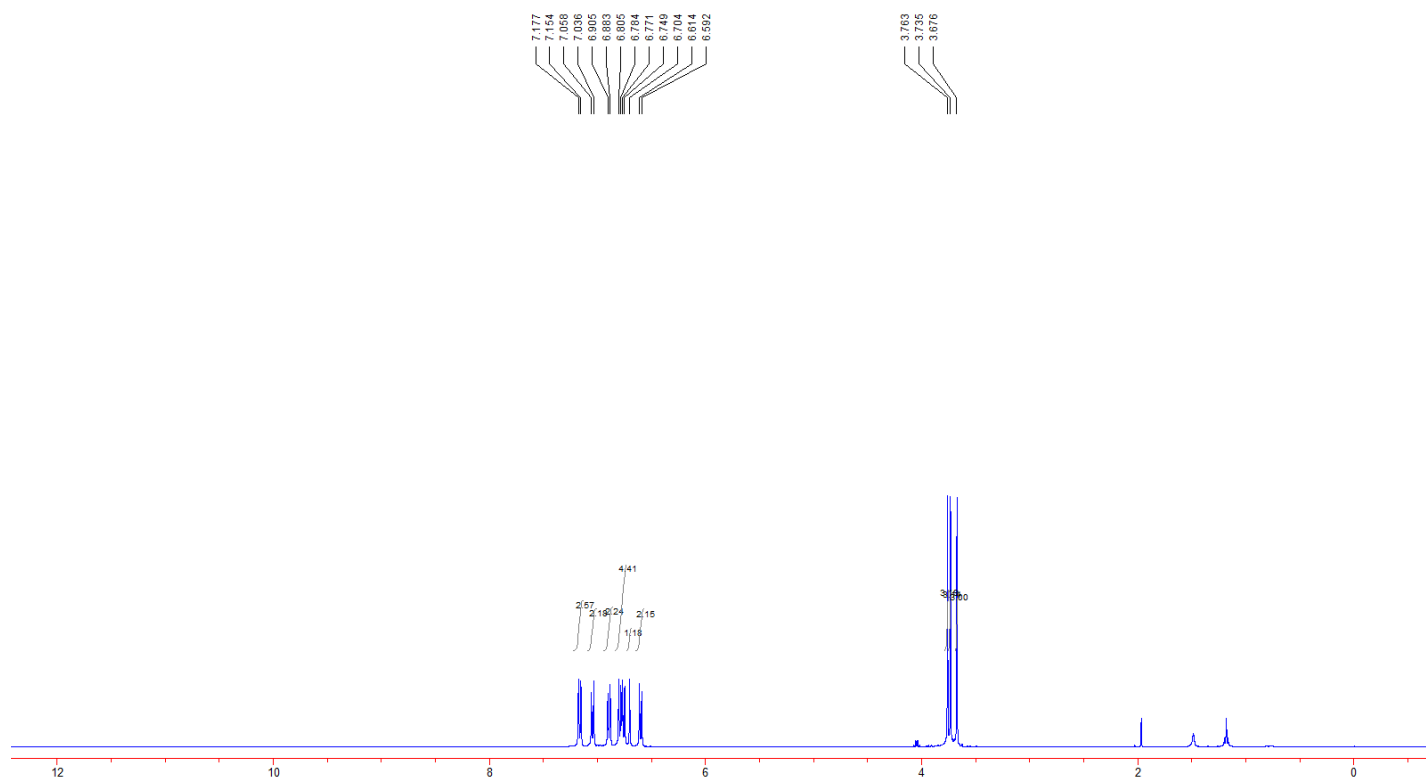

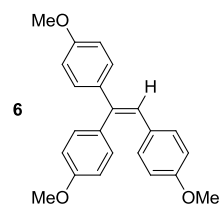

### <sup>13</sup>C NMR

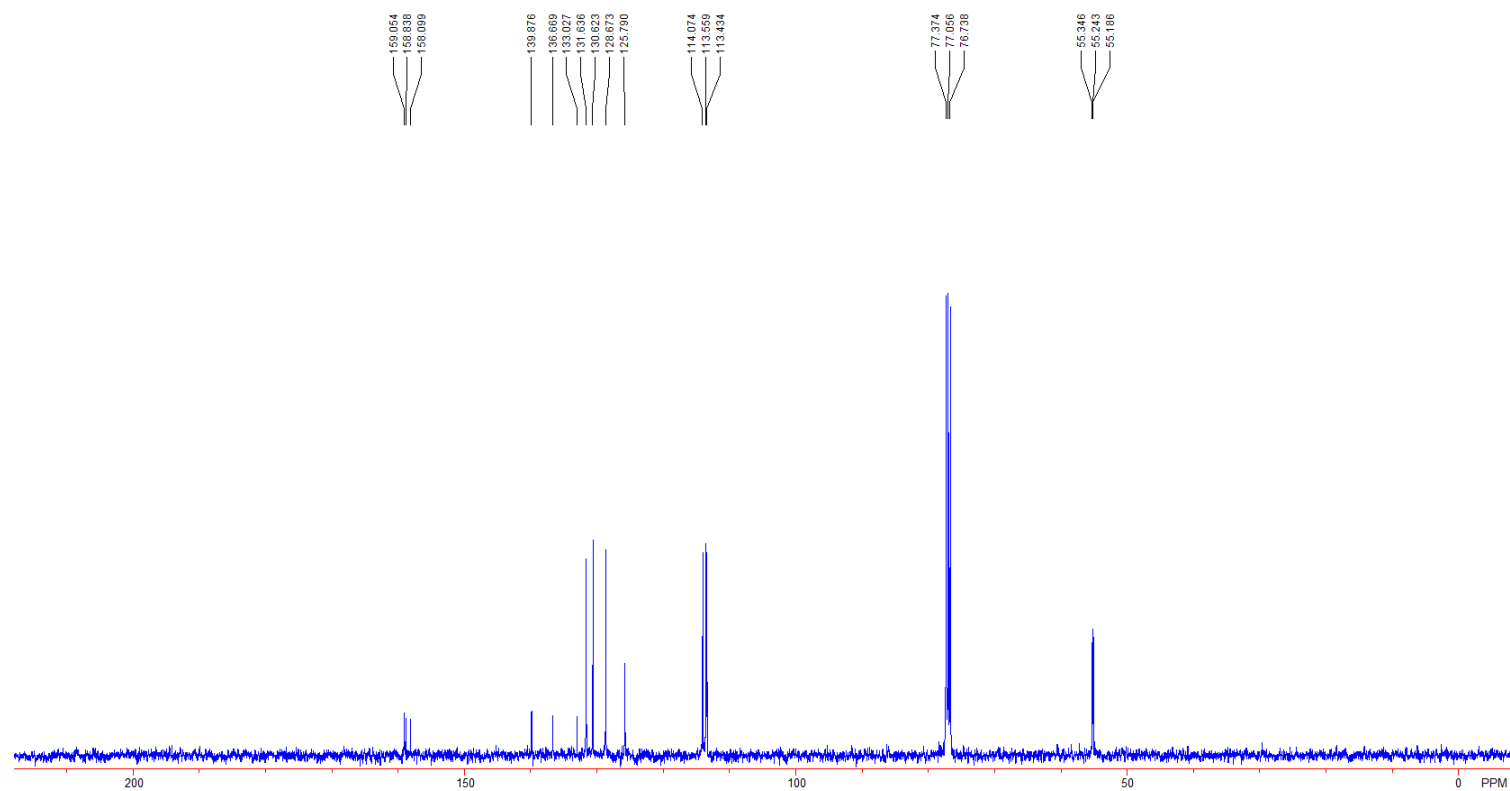

Supplement: c8cc07765g1.pdf [file c8cc07765g1.pdf]
